# Supplementary material for: Hyperinsulinemic and Pro-Inflammatory Dietary Patterns and Metabolomic Profiles Are Associated with Increased Risk of Total and Site-Specific Cancers among Postmenopausal Women
Source: MDPI journal article supplement (doi:10.3390/cancers15061756), 2023-03-14
Supplement: s1 [file s1]

## **Table of contents**

**Supplementary Figure S1. Workflow to derive the final analytic datasets. Total cancer, colorectal cancers, invasive breast cancer, and lung cancer had 0 participants with no cancer outcome exposure. HEI-2015 analyses in total cancer excluded extra 2 participants without HEI-2015 diet information.**

**Supplementary Table S1. Food group components of the empirical dietary index for hyperinsulinemia (EDIH) score, empirical dietary inflammatory pattern (EDIP) score and Health Eating Index (HEI) 2015.**

**Supplementary Table S2. Cancer sites definitions.**

**Supplementary Table S3. Description of covariates used in the current study.**

**Supplementary Table S4. Distribution of all nutrients available in the WHI by score quintiles in the total cancer analytic dataset.**

**Supplementary Table S5. Hazard ratios (95% CI) for the associations of dietary patterns with total and site-specific cancers, further adjusted for body mass index and type 2 diabetes.**

**Supplementary Table S6. Multivariable-adjusted associations of dietary patterns with specific cancers in body mass index (kg/m<sup>2</sup>) subgroups.**

**Supplementary Table S7. Multivariable-adjusted associations of dietary patterns with specific cancers in type 2 diabetes subgroups.**

**Supplementary Table S8. Multivariable-adjusted associations of dietary patterns with specific cancers including mutual adjustment**

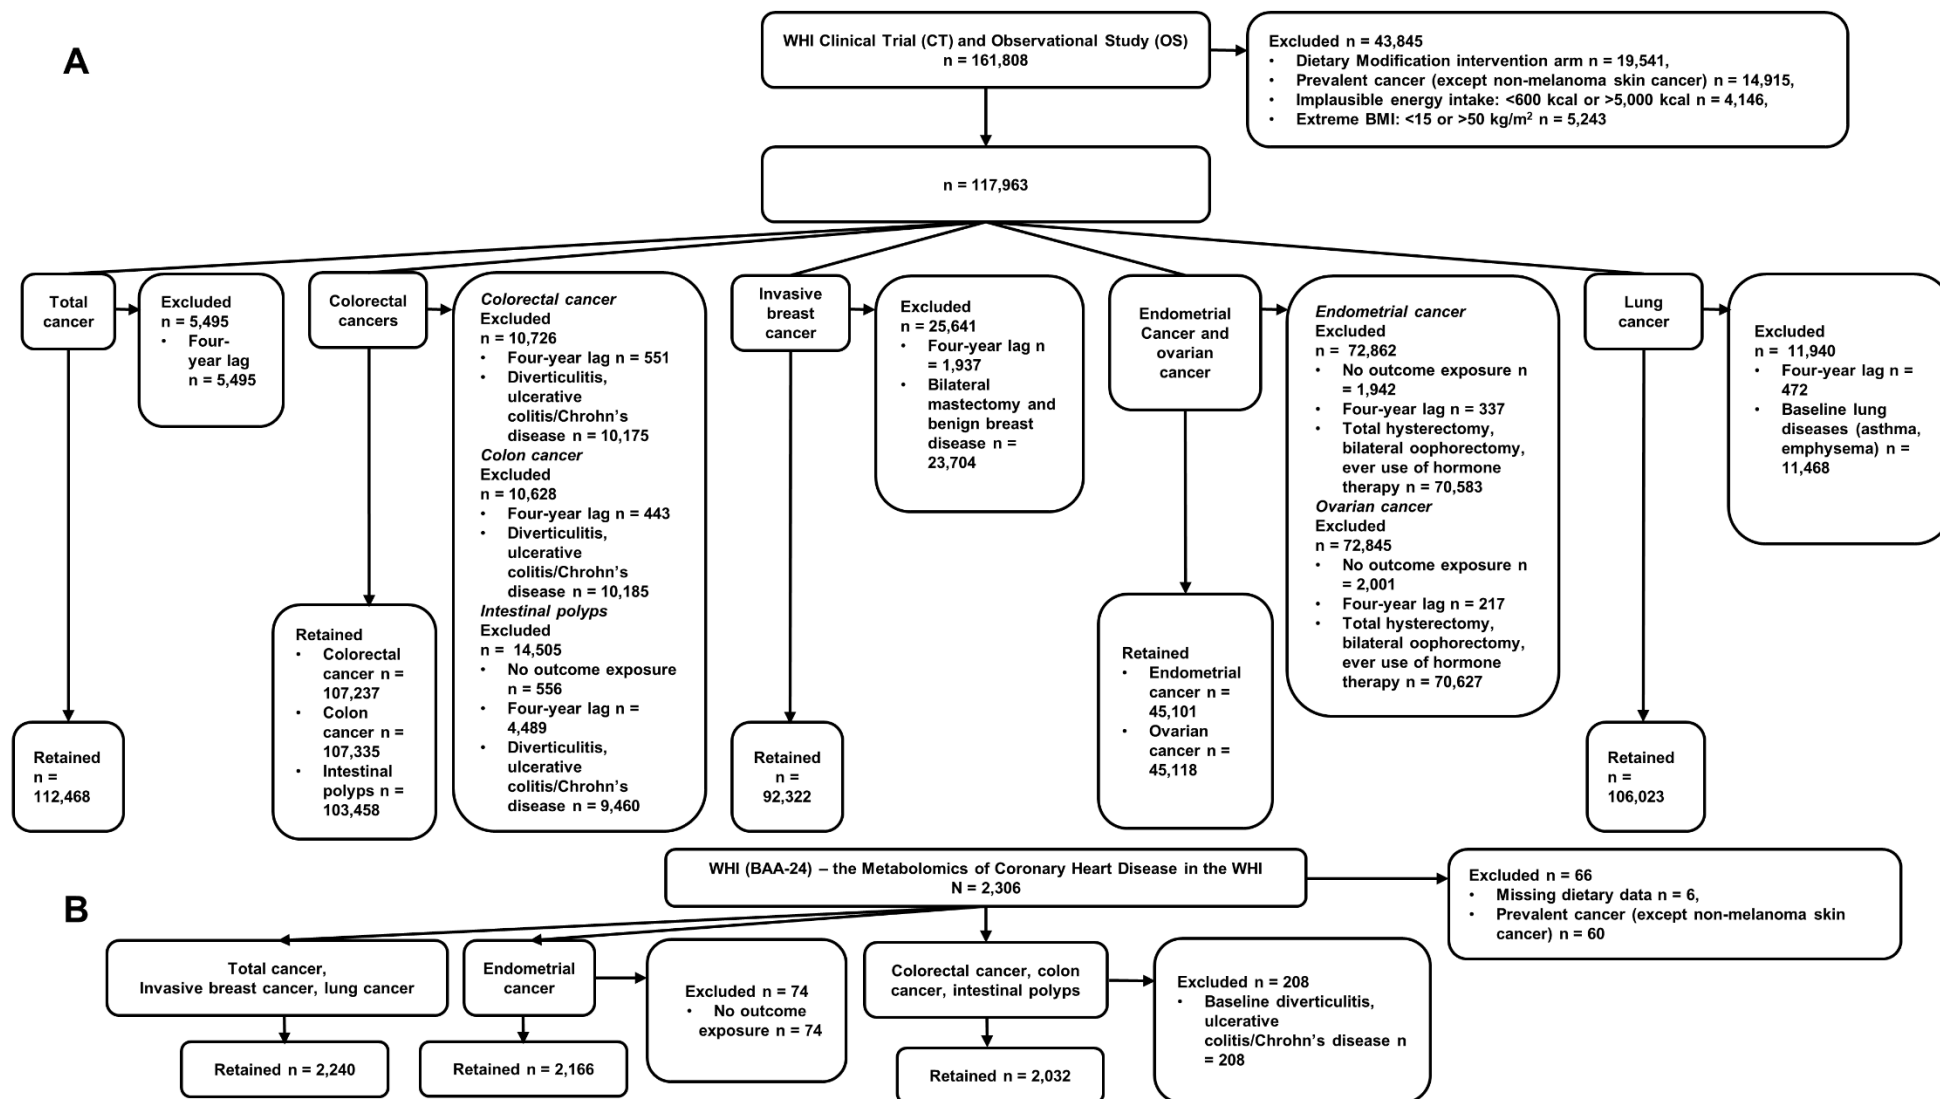

**Supplementary Figure S1. Workflow to derive the final analytic datasets. A.** The WHI dataset used to analyze dietary patterns in relation to total cancer and site-specific cancer risks. Total cancer, colorectal cancers, invasive breast cancer, and lung cancer had 0 participants with no cancer outcome exposure. HEI-2015 analyses in total cancer excluded extra 2 participants without HEI-2015 diet information. **B.** The metabolomics dataset used to analyze dietary pattern-related metabolomics signatures in relation to total cancer and site-specific cancer risks.

**Supplementary Table S1. Food group components of the empirical dietary index for hyperinsulinemia (EDIH) score, empirical dietary inflammatory pattern (EDIP) score and Health Eating Index (HEI) 2015.**

| EDIH components                   | Weight | Food items                                                                                                                                                                                               |
|-----------------------------------|--------|----------------------------------------------------------------------------------------------------------------------------------------------------------------------------------------------------------|
| <i><b>Positive components</b></i> |        |                                                                                                                                                                                                          |
| Processed meat                    | 0.199  | Processed meats (lunch meat other lunch meat) , bacon, hot dog                                                                                                                                           |
| Red meat                          | 0.25   | Beef, pork and lamb as a main dish , ground meat incl hamburgers, Beef, pork, and lamb as a sandwich, stew, pot pie and casseroles with meat, gravies made with meat drippings, Menudo and tortilla soup |
| Low-energy sugary beverages       | 0.053  | Low-energy cola, other low-energy carbonated beverages                                                                                                                                                   |
| High-energy sugary beverages      | 0.104  | Regular soft drinks (not diet)                                                                                                                                                                           |
| Margarine                         | 0.054  | Margarine                                                                                                                                                                                                |
| Butter                            | 0.094  | Butter                                                                                                                                                                                                   |
| French fries                      | 0.581  | French fries                                                                                                                                                                                             |
| Non-dark fish                     | 0.172  | Tuna, shrimp, lobster, scallops, seafood other than dark fish                                                                                                                                            |
| Eggs                              | 0.124  | Egg                                                                                                                                                                                                      |
| Low-fat dairy                     | 0.025  | Low-fat milk , sherbet or ice milk, yogurt, low-fat desserts                                                                                                                                             |
| Cream soup                        | 0.787  | Chowder or cream soup                                                                                                                                                                                    |
| Tomatoes                          | 0.095  | Fresh tomato & tomato juice, tomato sauce                                                                                                                                                                |
| Poultry                           | 0.183  | Chicken & turkey , fried chicken, Chicken or turkey with or without skin                                                                                                                                 |
| <i><b>Inverse components</b></i>  |        |                                                                                                                                                                                                          |
| Green leafy vegetables            | -0.055 | Spinach& mustard greens& turnip greens& collards, iceberg or head lettuce, romaine or leaf lettuce                                                                                                       |
| Wine                              | -0.165 | Red, white wine                                                                                                                                                                                          |
| Coffee                            | -0.035 | Coffee (regular or decaffeinated)                                                                                                                                                                        |
| High-fat dairy                    | -0.046 | Whole milk , cream , sour cream ice cream, cream cheese, other cheese                                                                                                                                    |
| Whole fruit                       | -0.029 | Raisins, grapes, avocado, banana, cantaloupe, watermelon, orange, apple, pear, grapefruit, strawberries, blueberries, peaches, apricots, plums                                                           |
| EDIP components                   | Weight | Food items                                                                                                                                                                                               |
| <i><b>Positive components</b></i> |        |                                                                                                                                                                                                          |
| Processed meat                    | 165.03 | Hot dogs, processed meats (including processed meat sandwich) , bacon                                                                                                                                    |
| Red meat                          | 140.19 | Hamburger, beef /pork /lamb sandwich, beef /pork/ lamb main dish                                                                                                                                         |
| Organ meat                        | 144.61 | Livers                                                                                                                                                                                                   |
| Other fish                        | 252.45 | Canned tuna, shrimp, breaded fish, lobster, scallops or other seafood                                                                                                                                    |
| Other vegetables                  | 136.14 | Corn, mixed vegetables, eggplant, celery, alfalfa sprouts, mushrooms, green/yellow/red peppers, zucchini, cucumbers                                                                                      |
| Refined grain                     | 81.21  | White bread, white rice, bagels/English muffins/rolls, muffins or biscuits, pasta, pancakes or waffles, refined cold breakfast cereals                                                                   |
| High energy beverage              | 156.85 | Cola, Hawaiian punch, caffeine-free coke, pepsi, carbonated beverage with caffeine and sugar, other carbonated beverage with sugar                                                                       |

|                            |          |                                                                                                                                                                           |
|----------------------------|----------|---------------------------------------------------------------------------------------------------------------------------------------------------------------------------|
| Low energy beverage        | 94.77    | Low calorie cola, low calorie caffeine -free cola, low calorie beverage with caffeine, other low calorie carbonated beverage, other low calorie beverage without caffeine |
| Tomato                     | 167.92   | Fresh tomatoes, tomato juice, tomato sauce                                                                                                                                |
| <b>Negative components</b> |          |                                                                                                                                                                           |
| Beer                       | -136.99  | Beer, light beer                                                                                                                                                          |
| Wine                       | -249.70  | White wine, red wine                                                                                                                                                      |
| Tea                        | -42.25   | Tea, tea (not herbal)                                                                                                                                                     |
| Coffee                     | -83.18   | Coffee, decaffeinated coffee                                                                                                                                              |
| Dark yellow vegetable      | -165.37  | Carrots, sweet potatoes, winter squash                                                                                                                                    |
| Green leafy vegetable      | -190.29  | Spinach, iceberg lettuce, romaine lettuce                                                                                                                                 |
| Snack                      | -45.08   | Potato/corn chips, popcorn, crackers                                                                                                                                      |
| Fruit juice                | -58.95   | Apple juice, orange juice, grape juice, prune juice, other juice                                                                                                          |
| Pizza                      | -1175.21 | Pizza                                                                                                                                                                     |

#### HEI2015 components

#### Maximum points

#### Adequacy

|                            |    |
|----------------------------|----|
| Total Fruits               | 5  |
| Whole Fruits               | 5  |
| Total Vegetables           | 5  |
| Greens and Beans           | 5  |
| Whole Grains               | 10 |
| Dairy                      | 10 |
| Total Protein Foods        | 5  |
| Seafood and Plant Proteins | 5  |
| Fatty Acids                | 10 |

#### Moderation

|                |    |
|----------------|----|
| Refined Grains | 10 |
| Sodium         | 10 |
| Added Sugars   | 10 |
| Saturated Fats | 10 |

**Supplementary Table S2. Cancer sites definitions**

| Cancer sites                | Descriptions                                                                                                                                                                                                                                                                                                                                                                                                                                                                                                             |
|-----------------------------|--------------------------------------------------------------------------------------------------------------------------------------------------------------------------------------------------------------------------------------------------------------------------------------------------------------------------------------------------------------------------------------------------------------------------------------------------------------------------------------------------------------------------|
| Total cancer                | The first occurrence of any cancer except non-melanoma skin cancer                                                                                                                                                                                                                                                                                                                                                                                                                                                       |
| Colorectal cancer subtypes  | Proximal colon cancer was defined based on the anatomic subsites, cecum, ascending colon, hepatic flexure of colon, and transverse colon (ICD site codes 18.0,18.2,18.3, 18.4)<br>Distal colon cancer was defined as cancers of splenic flexure of colon, descending colon, sigmoid colon (ICD site codes 18.5, 18.6,18.7)                                                                                                                                                                                               |
| Breast cancer subtypes      | Breast cancer subtypes were defined based on the status of estrogen receptor (ER), progesterone receptor (PR), human epidermal growth factor receptor (HER2), <sup>a</sup> and were combined to define triple negative (ER- PR- HER2-), luminal A (ER+ and/or PR+, HER2-), luminal B (ER+ and/or PR+, HER2+)<br><br>Other subtypes were defined based on Surveillance Epidemiology and End Results program (SEER) histology codes, including invasive ductal carcinoma (8500/3) and invasive lobular carcinoma (8520/3). |
| Endometrial cancer subtypes | Endometrioid (8140/3,8380/3); non-endometrioid - cases other than endometrioid cases.                                                                                                                                                                                                                                                                                                                                                                                                                                    |
| Ovarian cancer subtypes     | Serous ovarian cancer (8020/3, 8021/3, 8022/3, 8050/3, 8120/3, 8130/2, 8130/3, 8260/3, 8441/1, 8441/3, 8442/1, 8442/3, 8450/3, 8460/3, 8461/3, 8462/1, 9014/3)<br><br>Non-serous ovarian cancer (8380/3, 8381/3, 8382/3, 8383/3, 8310/3, 8470/3, 8471/3, 8472/1, 8480/3, 8950/3, 8323/3, 9000/1, 9000/3)                                                                                                                                                                                                                 |
| Lung cancer subtypes        | Small-cell lung cancer - (8041/3, 8042/3,8043/3,8044/3, 8045/3) <sup>b</sup><br>Non-small cell lung cancer (8046/3, 8070/3, 8140/3, 8250/3, 8012/3, 8560/3, 8240/3, 9050/3)                                                                                                                                                                                                                                                                                                                                              |

a.Curb JD, McTiernan A, Heckbert SR, Kooperberg C, Stanford J, Nevitt M, Johnson KC, Proulx-Burns L, Pastore L, Criqui M, Daugherty S; WHI Morbidity and Mortality Committee. Outcomes ascertainment and adjudication methods in the Women's Health Initiative. Ann Epidemiol. 2003 Oct;13(9 Suppl):S122-8. doi: 10.1016/s1047-2797(03)00048-6. PMID: 14575944.

b.SEER Training Modules, Lung Cancer, Abstracting, Coding, & Staging, Morphology & Grade. U. S. National Institutes of Health, National Cancer Institute

**Supplementary Table S3. Description of covariates used in the current study**

| Covariates                                                                | Variable Description                                                                                                                                                                                                                                                                                                                                                                     |
|---------------------------------------------------------------------------|------------------------------------------------------------------------------------------------------------------------------------------------------------------------------------------------------------------------------------------------------------------------------------------------------------------------------------------------------------------------------------------|
| Total energy intake                                                       | Dietary energy intake (kcal/day)                                                                                                                                                                                                                                                                                                                                                         |
| <b>Covariates included in all models</b>                                  |                                                                                                                                                                                                                                                                                                                                                                                          |
| Age, years                                                                | Age at screening, <50-59, 60-69, 70-79+                                                                                                                                                                                                                                                                                                                                                  |
| Physical activity                                                         | Total energy expended from recreational physical activity (MET-hours/week)                                                                                                                                                                                                                                                                                                               |
| Self-reported race and ethnicity                                          | 1 American Indian or Alaskan Native; 2 Asian or Pacific Islander; 3 Black or African American; 4 Hispanic/Latino; 5 White (not of Hispanic origin); 8 Other                                                                                                                                                                                                                              |
| Education                                                                 | Didn't go to school, grade school (1-8 yrs); Some high school (9-11 yrs)/High school diploma/GED/Vocational or training school/Some college or associate degree; Some post-graduate or professional/College graduate or Baccalaureate Degree/Master's Degree/Doctoral Degree (Ph.D,M.D.,J.D.,etc.). Missing values were imputed by income                                                |
| Family history of cancer                                                  | Yes/no                                                                                                                                                                                                                                                                                                                                                                                   |
| Hormone use                                                               | Number of hormones used. The variable was created from a sum of the following 8 WHI variables: Oral contraceptive use ever, diethylstilbestrol use ever, depo-provera use ever, unopposed estrogen use ever, Estrogen + progesterone use ever, Testosterone or other male hormone use, Estratest use, oral daily use of a glucocorticosteroid                                            |
| Supplement                                                                | Number of supplements taken. The variable was created from a sum of the following 23 supplements variables (yes=1/no=0): vitamin A, alpha-tocopherol, vitamin B1, vitamin B12, vitamin B2, vitamin B6, beta-carotene, biotin, vitamin C, calcium, chromium, copper, vitamin D, folic acid, iron, magnesium, manganese, molybdenum, niacin, pantothenic acid, retinol, selenium, and zinc |
| Comorbidity score                                                         | liver disease, lost 15lb past 6mo, dialysis, other chronic disease, stomach ulcer, diverticulitis, colitis, pancreatitis, arthritis, rheumatoid arthritis, gallstone or gallbladder disease, hypertension, high cholesterol                                                                                                                                                              |
| Baseline cardiovascular disease status                                    | Yes/no                                                                                                                                                                                                                                                                                                                                                                                   |
| Baseline lung disease                                                     | Asthma, emphysema, or both                                                                                                                                                                                                                                                                                                                                                               |
| Pack-years of smoking                                                     | Continuous variable                                                                                                                                                                                                                                                                                                                                                                      |
| Hormone Replacement Therapy (HT) study arm                                | HT study arm to which the participant was randomized: Not randomized to HRT;Estrogen-alone intervention; Estrogen-alone control;Estrogen + Progestin intervention;Estrogen+Progestin control                                                                                                                                                                                             |
| NSAID                                                                     | Baseline nonsteroidal anti-inflammatory agents use: no=1, yes=1                                                                                                                                                                                                                                                                                                                          |
| Baseline hormone therapy ever                                             | Yes/no                                                                                                                                                                                                                                                                                                                                                                                   |
| Oral contraceptive duration                                               | years                                                                                                                                                                                                                                                                                                                                                                                    |
| Coffee/tea                                                                | Coffee or tea (all types), med serv/day                                                                                                                                                                                                                                                                                                                                                  |
| Total alcohol intake                                                      | Alcohol servings per week (wine, beer and liquor servings). Number of servings per week of beer, wine and/or liquor based on a medium serving size which is 12oz of beer, 6oz of wine and 1.5 oz of liquor.                                                                                                                                                                              |
| <b>Covariates only included in colorectal cancer and subtype analyses</b> |                                                                                                                                                                                                                                                                                                                                                                                          |
| Colorectal cancer screening                                               | Hemoccult test or colonoscopy ever, yes/no                                                                                                                                                                                                                                                                                                                                               |
| <b>Covariates further included in breast cancer and subtype analyses</b>  |                                                                                                                                                                                                                                                                                                                                                                                          |
| Months of breast-feeding                                                  | Never breastfed, 1-6 months,7-12 Months, 13-23 Months, 24+ Months                                                                                                                                                                                                                                                                                                                        |
| Age at menopause                                                          | Continuous variable, age at which participant went through menopause                                                                                                                                                                                                                                                                                                                     |
| Mammogram ever                                                            | Yes/no                                                                                                                                                                                                                                                                                                                                                                                   |

|                        |                                                                                  |
|------------------------|----------------------------------------------------------------------------------|
| Parity                 | Number of Term Pregnancies: never pregnant, never had term pregnancy, 1,2,3,4,5+ |
| Bilateral oophorectomy | Yes/no                                                                           |
| Passive smoking        | Yes/no                                                                           |
| Gail 5-year risk score | Continuous                                                                       |

**Covariates further included in endometrial and ovarian cancer and subtype analyses**

|                                                   |                                                                                  |
|---------------------------------------------------|----------------------------------------------------------------------------------|
| Age at first birth                                | Never had term pregnancy, < 20, 20-29, 30+                                       |
| Age at menarche                                   | 9 or less, 10, 11, 12, 13, 14, 15, 16, 17 or older                               |
| Age at menopause                                  | Continuous variable, age at which participant went through menopause             |
| Months of breast-feeding                          | Never breastfed, 1-6 months, 7-12 Months, 13-23 Months, 24+ Months               |
| Parity                                            | Number of Term Pregnancies: never pregnant, never had term pregnancy, 1,2,3,4,5+ |
| Tubal ligation (only for ovarian cancer analyses) | Yes/no                                                                           |

**Covariates further included in lung cancer and subtype analyses**

|                 |                                           |
|-----------------|-------------------------------------------|
| Passive smoking | Yes/no                                    |
| Smoking status  | Never Smoked, past smoker, current smoker |

**Other covariates**

|                       |                               |
|-----------------------|-------------------------------|
| Body mass index (BMI) | Continuous, kg/m <sup>2</sup> |
| Diabetes ever         | Yes/no                        |

---

**Supplementary Table S4. Distribution of all nutrients available in the WHI by score quintiles in the total cancer analytic dataset <sup>a</sup>**

|                                   | Empirical Index for Hyperinsulinemic (EDIH)<br>score |                |               |              |              | Empirical Inflammatory Pattern (EDIP) score |                |               |              |              | Health Eating Index 2015 (HEI-2015) |                |               |              |              |
|-----------------------------------|------------------------------------------------------|----------------|---------------|--------------|--------------|---------------------------------------------|----------------|---------------|--------------|--------------|-------------------------------------|----------------|---------------|--------------|--------------|
|                                   | Quintile 1                                           | Quintile 2     | Quintile 3    | Quintile 4   | Quintile 5   | Quintile 1                                  | Quintile 2     | Quintile 3    | Quintile 4   | Quintile 5   | Quintile 1                          | Quintile 2     | Quintile 3    | Quintile 4   | Quintile 5   |
| <b>Carbohydrates <sup>b</sup></b> | (-10.52, -0.80)                                      | (-0.80, -0.27) | (-0.27, 0.16) | (0.16, 0.67) | (0.67, 8.89) | (-11.59, -0.75)                             | (-0.75, -0.16) | (-0.16, 0.28) | (0.28, 0.73) | (0.73, 6.55) | (-4.33, -0.81)                      | (-0.81, -0.16) | (-0.16, 0.37) | (0.37, 0.92) | (0.92, 3.06) |
| Total Carbohydrate                | 135.9±24.52                                          | 134.88±22.32   | 130.16±21.18  | 122.42±19.62 | 112.09±21.26 | 126.19±24.66                                | 128.30±23.34   | 128.47±22.96  | 127.82±22.98 | 124.56±23.67 | 114.31±22.21                        | 120.23±21.91   | 126.8±1.92    | 133.15±21.6  | 140.95±20.49 |
| Pectins                           | 1.87±0.89                                            | 1.86±0.89      | 1.75±0.85     | 1.53±0.73    | 1.18±0.55    | 1.81±0.88                                   | 1.78±0.83      | 1.71±0.83     | 1.61±0.81    | 1.29±0.71    | 0.97±0.46                           | 1.36±0.60      | 1.65±0.73     | 1.95±0.82    | 2.26±0.83    |
| Starch                            | 49.27±13.46                                          | 49.48±12.58    | 48.92±12.09   | 47.76±11.56  | 44.69±10.86  | 46.79±12.4                                  | 47.86±11.79    | 48.27±11.72   | 48.74±12.14  | 48.48±13.17  | 47.89±13.1                          | 47.72±12.69    | 47.95±12.48   | 48.06±11.98  | 48.52±10.99  |
| Total fiber                       | 11.55±3.91                                           | 11.45±3.73     | 10.9±3.54     | 9.86±3.06    | 8.08±2.53    | 10.89±3.76                                  | 10.89±3.57     | 10.68±3.57    | 10.33±3.53   | 9.05±3.37    | 7.28±2.16                           | 9.02±2.56      | 10.36±2.96    | 11.75±3.30   | 13.43±3.50   |
| Water soluble fiber               | 3.05±1.02                                            | 3.04±0.99      | 2.90±0.93     | 2.64±0.80    | 2.22±0.65    | 2.87±0.98                                   | 2.89±0.94      | 2.85±0.94     | 2.77±0.92    | 2.46±0.85    | 2.10±0.61                           | 2.46±0.72      | 2.76±0.83     | 3.08±0.91    | 3.46±0.96    |
| Insoluble fiber                   | 8.45±3.02                                            | 8.37±2.88      | 7.96±2.75     | 7.16±2.38    | 5.80±1.98    | 7.97±2.90                                   | 7.95±2.76      | 7.78±2.76     | 7.51±2.74    | 6.53±2.63    | 5.12±1.66                           | 6.50±1.97      | 7.55±2.27     | 8.63±2.54    | 9.95±2.69    |
| Total Sugars                      | 67.21±18.81                                          | 66.52±17.99    | 63.43±17.5    | 58.56±16.93  | 54.01±10.97  | 60.84±18.95                                 | 62.53±18.22    | 62.79±18.24   | 62.37±18.52  | 61.20±15.57  | 53.73±20.29                         | 57.28±18.5     | 61.65±18.03   | 65.92±17.4   | 71.15±16.22  |
| Galactose                         | 0.25±0.27                                            | 0.23±0.24      | 0.20±0.21     | 0.18±0.20    | 0.14±0.15    | 0.23±0.24                                   | 0.22±0.23      | 0.21±0.22     | 0.19±0.22    | 0.16±0.19    | 0.15±0.18                           | 0.19±0.22      | 0.21±0.23     | 0.22±0.23    | 0.24±0.23    |
| Glucose                           | 14.34±5.66                                           | 14.4±5.68      | 13.91±5.66    | 12.95±5.54   | 12.82±7.62   | 13.28±5.5                                   | 13.72±5.6      | 13.74±5.68    | 13.68±5.89   | 14.01±7.65   | 11.35±6.81                          | 12.51±5.94     | 13.78±5.75    | 14.86±5.56   | 15.92±5.34   |
| Fructose                          | 14.1±6.4                                             | 14.26±6.48     | 13.85±6.56    | 12.94±6.53   | 13.32±9.66   | 13.05±6.25                                  | 13.54±6.37     | 13.61±6.52    | 13.64±6.85   | 14.62±9.63   | 11.09±8.5                           | 12.31±7.10     | 13.71±6.72    | 15.00±6.42   | 16.36±6.05   |
| Lactose                           | 12.7±8.42                                            | 12.27±8.08     | 11.31±7.64    | 10.07±6.96   | 8.04±5.72    | 11.02±7.77                                  | 11.25±7.38     | 11.30±7.56    | 11.08±7.80   | 9.73±7.44    | 7.90±6.08                           | 9.45±6.76      | 10.60±7.36    | 11.96±7.72   | 14.47±8.27   |
| Maltose                           | 2.08±0.93                                            | 1.97±0.85      | 1.85±0.80     | 1.72±0.73    | 1.52±0.64    | 1.94±0.91                                   | 1.9±0.83       | 1.86±0.8      | 1.80±0.79    | 1.66±0.73    | 1.59±0.69                           | 1.70±0.76      | 1.82±0.80     | 1.93±0.85    | 2.11±0.90    |
| Sucrose                           | 23.74±9.14                                           | 23.39±8.41     | 22.32±7.85    | 20.71±7.51   | 18.17±6.87   | 21.33±8.83                                  | 21.91±8.17     | 22.07±8.05    | 21.98±8.08   | 21.02±8.05   | 21.64±9.85                          | 21.12±8.45     | 21.54±8.04    | 21.96±7.63   | 22.07±6.97   |
| Added Sugars                      | 28.96±12.06                                          | 28.78±11.52    | 28.33±11.69   | 28.23±12.8   | 31.31±19.95  | 26.27±11.42                                 | 27.47±11.29    | 28.21±11.66   | 29.32±12.69  | 34.35±19.72  | 34.89±18.87                         | 30.15±14.43    | 28.57±12.66   | 27.01±10.85  | 25.01±9.21   |
| <b>Protein <sup>b</sup></b>       |                                                      |                |               |              |              |                                             |                |               |              |              |                                     |                |               |              |              |
| Total Protein                     | 39.84±7.37                                           | 41.4±7.49      | 42.15±7.52    | 43.16±8.03   | 43.45±9.12   | 41.71±7.99                                  | 42.27±7.68     | 42.28±7.7     | 42.24±7.89   | 41.49±8.84   | 39.00±8.25                          | 41.29±7.76     | 42.26±7.7     | 43.23±7.84   | 44.21±7.62   |
| Animal Protein                    | 25.77±8.11                                           | 27.69±8.07     | 29.02±7.91    | 30.86±8.21   | 32.66±9.09   | 28.45±8.58                                  | 29.10±8.38     | 29.29±8.37    | 29.53±8.54   | 29.62±9.19   | 28.24±8.72                          | 29.44±8.43     | 29.54±8.52    | 29.59±8.72   | 29.19±8.68   |



|                                |                     |                  |                  |                  |                  |                 |                  |                  |                  |                  |                  |                  |                  |                  |                  |
|--------------------------------|---------------------|------------------|------------------|------------------|------------------|-----------------|------------------|------------------|------------------|------------------|------------------|------------------|------------------|------------------|------------------|
| Vegetable Protein              | 14.02<br>±4.01      | 13.65±<br>3.5    | 13.08±3.<br>18   | 12.24±2.<br>85   | 10.73±2.<br>57   | 13.18±3.<br>56  | 13.11±3.<br>35   | 12.93±3.<br>34   | 12.67±3.<br>35   | 11.83±3.<br>53   | 10.70±2.<br>82   | 11.79±2.<br>92   | 12.66±3.<br>09   | 13.59±3.<br>23   | 14.97±3.<br>57   |
| Alanine                        | 1.79±<br>0.37       | 1.9±0.3<br>8     | 1.98±0.3<br>9    | 2.07±0.4<br>3    | 2.15±0.5<br>1    | 1.94±0.4<br>3   | 1.98±0.4<br>2    | 1.98±0.4<br>2    | 2.00±0.4<br>3    | 2±0.49           | 1.86±0.4<br>7    | 1.97±0.4<br>4    | 2.00±0.4<br>3    | 2.03±0.4<br>3    | 2.04±0.4<br>0    |
| Arginine                       | 2±0.3<br>9          | 2.12±0.<br>4     | 2.20±0.4<br>1    | 2.3±0.46         | 2.39±0.5<br>5    | 2.15±0.4<br>5   | 2.20±0.4<br>4    | 2.21±0.4<br>4    | 2.22±0.4<br>6    | 2.23±0.5<br>3    | 2.08±0.5<br>1    | 2.19±0.4<br>7    | 2.22±0.4<br>5    | 2.26±0.4<br>5    | 2.27±0.4<br>1    |
| Aspartic Acid                  | 3.45±<br>0.67       | 3.61±0.<br>68    | 3.69±0.6<br>8    | 3.79±0.7<br>4    | 3.84±0.8<br>4    | 3.64±0.7<br>3   | 3.7±0.71<br>3    | 3.7±0.70<br>3    | 3.70±0.7<br>2    | 3.63±0.8<br>2    | 3.34±0.7<br>6    | 3.59±0.7<br>1    | 3.71±0.7<br>0    | 3.82±0.7<br>1    | 3.92±0.6<br>8    |
| Cystine                        | 0.63±<br>0.18       | 0.66±0.<br>18    | 0.66±0.1<br>7    | 0.66±0.1<br>6    | 0.64±0.1<br>6    | 0.63±0.1<br>7   | 0.65±0.1<br>6    | 0.66±0.1<br>7    | 0.66±0.1<br>7    | 0.64±0.1<br>7    | 0.57±0.1<br>4    | 0.62±0.1<br>5    | 0.65±0.1<br>6    | 0.68±0.1<br>7    | 0.73±0.1<br>9    |
| Glutamic Acid                  | 8.04±<br>1.43       | 8.23±1.<br>4     | 8.27±1.3<br>9    | 8.33±1.4<br>3    | 8.20±1.5<br>6    | 8.2±1.47        | 8.30±1.3<br>8    | 8.28±1.3<br>9    | 8.25±1.4<br>1    | 8.05±1.5<br>7    | 7.66±1.4<br>6    | 8.07±1.3<br>9    | 8.25±1.3<br>9    | 8.44±1.4<br>1    | 8.65±1.3<br>9    |
| Glycine                        | 1.5±0.<br>3         | 1.61±0.<br>32    | 1.69±0.3<br>3    | 1.80±0.3<br>8    | 1.91±0.4<br>7    | 1.65±0.3<br>8   | 1.69±0.3<br>7    | 1.70±0.3<br>7    | 1.72±0.3<br>9    | 1.75±0.4<br>5    | 1.65±0.4<br>4    | 1.71±0.4<br>0    | 1.72±0.3<br>9    | 1.73±0.3<br>8    | 1.71±0.3<br>4    |
| Histidine                      | 1.05±<br>0.21       | 1.11±0.<br>21    | 1.14±0.2<br>2    | 1.19±0.2<br>4    | 1.23±0.2<br>8    | 1.12±0.2<br>4   | 1.15±0.2<br>3    | 1.15±0.2<br>3    | 1.15±0.2<br>4    | 1.15±0.2<br>7    | 1.09±0.2<br>6    | 1.14±0.2<br>4    | 1.15±0.2<br>4    | 1.17±0.2<br>4    | 1.17±0.2<br>2    |
| Total BCAA                     | 5.72±<br>1.17       | 5.94<br>±1.18    | 6.05<br>±1.18    | 6.20±<br>1.24    | 6.24<br>±1.37    | 5.99<br>±1.26   | 6.08<br>±1.20    | 6.07<br>±1.20    | 6.06±<br>1.22    | 5.95±<br>1.34    | 5.61±<br>1.27    | 5.94<br>±1.21    | 6.08±<br>1.21    | 6.21<br>±1.23    | 6.31<br>±1.19    |
| Leucine                        | 3.18±<br>0.68       | 3.3±0.6<br>8     | 3.36±0.6<br>7    | 3.43±0.6<br>9    | 3.45±0.7<br>5    | 3.31±0.7        | 3.37±0.6<br>8    | 3.37±0.6<br>8    | 3.37±0.6<br>9    | 3.31±0.7<br>5    | 3.10±0.7<br>0    | 3.29±0.6<br>7    | 3.36±0.6<br>8    | 3.44±0.7<br>0    | 3.53±0.6<br>9    |
| Valine                         | 2.11±<br>0.43       | 2.18±0.<br>43    | 2.20±0.4<br>2    | 2.25±0.4<br>4    | 2.25±0.4<br>8    | 2.19±0.4<br>5   | 2.22±0.4<br>3    | 2.21±0.4<br>3    | 2.20±0.4<br>3    | 2.15±0.4<br>8    | 2.03±0.4<br>5    | 2.16±0.4<br>3    | 2.21±0.4<br>3    | 2.26±0.4<br>4    | 2.31±0.4<br>2    |
| Isoleucine                     | 1.81±<br>0.37       | 1.88±0.<br>38    | 1.92±0.3<br>8    | 1.98±0.4<br>0    | 2.00±0.4<br>5    | 1.90±0.4<br>0   | 1.93±0.3<br>9    | 1.93±0.3<br>9    | 1.93±0.3<br>9    | 1.9±0.43         | 1.79±0.4<br>1    | 1.89±0.3<br>9    | 1.93±0.3<br>9    | 1.97±0.4<br>0    | 2.00±0.3<br>8    |
| Lysine                         | 2.64±<br>0.63       | 2.79±0.<br>65    | 2.88±0.6<br>4    | 3.00±0.6<br>9    | 3.10±0.7<br>7    | 2.84±0.6<br>9   | 2.89±0.6<br>7    | 2.90±0.6<br>7    | 2.90±0.6<br>9    | 2.87±0.7<br>6    | 2.70±0.7<br>2    | 2.86±0.6<br>8    | 2.91±0.6<br>8    | 2.96±0.6<br>9    | 2.99±0.6<br>7    |
| Methionine                     | 0.88±<br>0.19       | 0.92±0.<br>2     | 0.95±0.2<br>0    | 1.00±0.2<br>1    | 1.02±0.2<br>4    | 0.94±0.2<br>1   | 0.96±0.2<br>1    | 0.96±0.2<br>1    | 0.96±0.2<br>1    | 0.96±0.2<br>3    | 0.91±0.2<br>2    | 0.95±0.2<br>1    | 0.97±0.2<br>1    | 0.98±0.2<br>1    | 0.97±0.2<br>0    |
| Phenylalanine                  | 1.79±<br>0.33       | 1.84±0.<br>33    | 1.86±0.3<br>3    | 1.90±0.3<br>5    | 1.89±0.3<br>8    | 1.85±0.3<br>5   | 1.87±0.3<br>3    | 1.87±0.3<br>3    | 1.86±0.3<br>4    | 1.83±0.3<br>8    | 1.72±0.3<br>5    | 1.82±0.3<br>4    | 1.87±0.3<br>3    | 1.91±0.3<br>4    | 1.96±0.3<br>3    |
| Proline                        | 2.92±<br>0.65       | 2.95±0.<br>63    | 2.92±0.6<br>0    | 2.90±0.5<br>9    | 2.80±0.5<br>7    | 2.91±0.6<br>3   | 2.94±0.5<br>9    | 2.93±0.5<br>9    | 2.91±0.6<br>0    | 2.8±0.62         | 2.67±0.5<br>7    | 2.83±0.5<br>7    | 2.90±0.5<br>9    | 2.99±0.6<br>1    | 3.10±0.6<br>1    |
| Serine                         | 1.84±<br>0.36       | 1.89±0.<br>35    | 1.91±0.3<br>5    | 1.94±0.3<br>6    | 1.94±0.4<br>0    | 1.89±0.3<br>7   | 1.92±0.3<br>5    | 1.92±0.3<br>5    | 1.92±0.3<br>6    | 1.88±0.4         | 1.76±0.3<br>7    | 1.87±0.3<br>5    | 1.91±0.3<br>5    | 1.96±0.3<br>6    | 2.02±0.3<br>5    |
| Threonine                      | 1.44±<br>0.29       | 1.51±0.<br>3     | 1.55±0.3         | 1.61±0.3<br>3    | 1.65±0.3<br>8    | 1.53±0.3<br>3   | 1.56±0.3<br>2    | 1.56±0.3<br>1    | 1.56±0.3<br>2    | 1.55±0.3<br>6    | 1.46±0.3<br>5    | 1.54±0.3<br>3    | 1.57±0.3<br>2    | 1.59±0.3<br>2    | 1.60±0.3<br>1    |
| Tryptophan                     | 0.45±<br>0.09       | 0.46±0.<br>09    | 0.46±0.0<br>9    | 0.47±0.0<br>9    | 0.46±0.1<br>0    | 0.46±0.1<br>0   | 0.46±0.0<br>9    | 0.46±0.0<br>9    | 0.46±0.0<br>9    | 0.45±0.1<br>0    | 0.42±0.0<br>9    | 0.45±0.0<br>9    | 0.46±0.0<br>9    | 0.48±0.0<br>9    | 0.49±0.0<br>9    |
| Tyrosine                       | 1.43±<br>0.31       | 1.47±0.<br>31    | 1.49±0.3<br>0    | 1.52±0.3<br>1    | 1.52±0.3<br>3    | 1.48±0.3<br>2   | 1.50±0.3         | 1.50±0.3<br>0    | 1.49±0.3<br>1    | 1.46±0.3<br>3    | 1.38±0.3<br>1    | 1.46±0.3<br>0    | 1.50±0.3<br>0    | 1.53±0.3<br>1    | 1.56±0.3<br>1    |
| 3-Methylhistidine <sup>c</sup> | 5.95±<br>2.96       | 7.12±3.<br>07    | 8.15±3.1<br>7    | 9.43±3.4<br>9    | 11.08±4.<br>3    | 7.71±3.6<br>6   | 8.06±3.6<br>7    | 8.25±3.7<br>1    | 8.53±3.8<br>4    | 9.16±4.2<br>7    | 8.60±4.1<br>5    | 8.74±3.9<br>5    | 8.54±3.8<br>3    | 8.27±3.7<br>5    | 7.57±3.5<br>2    |
| <b>Fats<sup>b</sup></b>        |                     |                  |                  |                  |                  |                 |                  |                  |                  |                  |                  |                  |                  |                  |                  |
| Total Fat                      | 30.71<br>±9.06      | 32.57±<br>8.79   | 34.70±8.<br>5    | 37.69±8.<br>08   | 42.03±8.<br>15   | 33.35±9.<br>55  | 34.48±9.<br>25   | 35.31±9.<br>12   | 36.24±9.<br>16   | 38.31±9.<br>23   | 42.44±8.<br>14   | 38.76±8.<br>28   | 35.37±8.<br>31   | 32.31±8.<br>17   | 28.83±7.<br>68   |
| Cholesterol <sup>c</sup>       | 104.3<br>7±43.<br>9 | 116.05<br>±45.92 | 127.81±<br>48.48 | 144.45±<br>55.31 | 164.39±<br>66.49 | 122.5±5<br>5.86 | 126.74±<br>54.07 | 129.97±<br>54.26 | 134.42±<br>55.86 | 143.44±<br>61.15 | 154.03±<br>65.69 | 143.13±<br>57.61 | 132.69±<br>52.28 | 121.46±<br>48.30 | 105.76±<br>44.68 |

|                             |                |                |                |                |                |                |                |                |                |                |                |                |                |                |                |
|-----------------------------|----------------|----------------|----------------|----------------|----------------|----------------|----------------|----------------|----------------|----------------|----------------|----------------|----------------|----------------|----------------|
| Total SFA                   | 10.32<br>±3.71 | 10.81±<br>3.51 | 11.47±3.<br>38 | 12.47±3.<br>26 | 14.05±3.<br>39 | 11.14±3.<br>8  | 11.48±3.<br>66 | 11.74±3.<br>60 | 12.04±3.<br>63 | 12.72±3.<br>62 | 15.15±3.<br>51 | 13.25±3.<br>16 | 11.73±2.<br>91 | 10.34±2.<br>64 | 8.65±2.3<br>3  |
| SFA 4:0                     | 0.26±<br>0.17  | 0.26±0.<br>16  | 0.26±0.1<br>6  | 0.27±0.1<br>7  | 0.30±0.1<br>9  | 0.27±0.1<br>8  | 0.27±0.1<br>7  | 0.27±0.1<br>7  | 0.27±0.1<br>7  | 0.26±0.1<br>7  | 0.38±0.2<br>1  | 0.32±0.1<br>7  | 0.27±0.1<br>4  | 0.22±0.1<br>2  | 0.16±0.0<br>9  |
| SFA 6:0                     | 0.12±<br>0.09  | 0.12±0.<br>09  | 0.13±0.0<br>9  | 0.13±0.0<br>9  | 0.15±0.1<br>1  | 0.13±0.1<br>0  | 0.13±0.0<br>9  | 0.13±0.0<br>9  | 0.13±0.0<br>9  | 0.13±0.0<br>9  | 0.19±0.1<br>2  | 0.16±0.1<br>0  | 0.13±0.0<br>8  | 0.10±0.0<br>6  | 0.08±0.0<br>5  |
| SFA 8:0                     | 0.1±0.<br>06   | 0.09±0.<br>06  | 0.10±0.0<br>6  | 0.10±0.0<br>6  | 0.11±0.0<br>7  | 0.10±0.0<br>6  | 0.10±0.0<br>6  | 0.10±0.0<br>6  | 0.10±0.0<br>6  | 0.10±0.0<br>7  | 0.14±0.0<br>8  | 0.12±0.0<br>6  | 0.10±0.0<br>5  | 0.08±0.0<br>4  | 0.06±0.0<br>3  |
| SFA 10:0                    | 0.18±<br>0.12  | 0.18±0.<br>12  | 0.19±0.1<br>2  | 0.20±0.1<br>2  | 0.22±0.1<br>4  | 0.19±0.1<br>3  | 0.20±0.1<br>2  | 0.20±0.1<br>2  | 0.20±0.1<br>2  | 0.20±0.1<br>2  | 0.28±0.1<br>5  | 0.23±0.1<br>2  | 0.19±0.1<br>0  | 0.16±0.0<br>8  | 0.12±0.0<br>6  |
| SFA 12:0                    | 0.25±<br>0.18  | 0.25±0.<br>17  | 0.26±0.1<br>7  | 0.27±0.1<br>7  | 0.30±0.1<br>8  | 0.25±0.1<br>6  | 0.26±0.1<br>7  | 0.26±0.1<br>7  | 0.27±0.1<br>8  | 0.29±0.1<br>9  | 0.39±0.2<br>2  | 0.31±0.1<br>6  | 0.26±0.1<br>4  | 0.21±0.1<br>2  | 0.16±0.1<br>1  |
| SFA 14:0                    | 0.91±<br>0.49  | 0.92±0.<br>46  | 0.95±0.4<br>5  | 1.01±0.4<br>5  | 1.12±0.4<br>8  | 0.96±0.4<br>9  | 0.98±0.4<br>7  | 0.98±0.4<br>6  | 0.99±0.4<br>7  | 1.01±0.4<br>6  | 1.34±0.5<br>4  | 1.14±0.4<br>5  | 0.97±0.3<br>8  | 0.83±0.3<br>2  | 0.64±0.2<br>6  |
| SFA 16:0,<br>Palmitic Acid  | 5.47±<br>1.77  | 5.79±1.<br>68  | 6.18±1.6<br>2  | 6.75±1.5<br>5  | 7.63±1.6<br>2  | 5.98±1.8<br>5  | 6.17±1.7<br>8  | 6.31±1.7<br>6  | 6.49±1.7<br>8  | 6.88±1.8<br>0  | 7.94±1.6<br>7  | 7.07±1.5<br>5  | 6.33±1.4<br>6  | 5.66±1.3<br>6  | 4.82±1.2<br>3  |
| SFA 17:0                    | 0.03±<br>0.02  | 0.03±0.<br>02  | 0.04±0.0<br>2  | 0.04±0.0<br>3  | 0.05±0.0<br>3  | 0.04±0.0<br>3  | 0.04±0.0<br>2  | 0.04±0.0<br>3  | 0.04±0.0<br>3  | 0.04±0.0<br>3  | 0.05±0.0<br>3  | 0.05±0.0<br>3  | 0.04±0.0<br>2  | 0.03±0.0<br>2  | 0.02±0.0<br>2  |
| SFA 18:0,<br>Stearic Acid   | 2.63±<br>0.99  | 2.81±0.<br>95  | 3.03±0.9<br>1  | 3.34±0.8<br>6  | 3.84±0.8<br>6  | 2.87±1.0<br>0  | 2.99±0.9<br>7  | 3.09±0.9<br>7  | 3.21±0.9<br>9  | 3.47±1.0<br>0  | 4.09±0.8<br>6  | 3.54±0.8<br>1  | 3.10±0.7<br>8  | 2.71±0.7<br>3  | 2.21±0.6<br>7  |
| SFA 20:0                    | 0.05±<br>0.04  | 0.05±0.<br>03  | 0.05±0.0<br>3  | 0.05±0.0<br>4  |
| SFA 22:0                    | 0.06±<br>0.07  | 0.05±0.<br>06  | 0.05±0.0<br>5  | 0.05±0.0<br>5  | 0.04±0.0<br>4  | 0.05±0.0<br>6  | 0.05±0.0<br>6  | 0.05±0.0<br>5  | 0.05±0.0<br>5  | 0.04±0.0<br>5  | 0.04±0.0<br>4  | 0.04±0.0<br>5  | 0.05±0.0<br>5  | 0.05±0.0<br>6  | 0.06±0.0<br>7  |
| Total MFA                   | 11.52<br>±3.74 | 12.24±<br>3.68 | 13.11±3.<br>57 | 14.32±3.<br>40 | 16.11±3.<br>37 | 12.60±3.<br>95 | 13.04±3.<br>86 | 13.36±3.<br>79 | 13.72±3.<br>78 | 14.60±3.<br>85 | 15.93±3.<br>39 | 14.64±3.<br>52 | 13.41±3.<br>60 | 12.28±3.<br>58 | 11.05±3.<br>46 |
| MFA 14:1                    | 0.02±<br>0.02  | 0.03±0.<br>02  | 0.03±0.0<br>2  | 0.03±0.0<br>2  | 0.04±0.0<br>2  | 0.03±0.0<br>2  | 0.03±0.0<br>2  | 0.03±0.0<br>2  | 0.03±0.0<br>2  | 0.04±0.0<br>2  | 0.04±0.0<br>2  | 0.03±0.0<br>2  | 0.03±0.0<br>2  | 0.03±0.0<br>2  | 0.02±0.0<br>1  |
| MFA 16:1                    | 0.44±<br>0.16  | 0.48±0.<br>16  | 0.53±0.1<br>6  | 0.60±0.1<br>6  | 0.70±0.1<br>8  | 0.51±0.1<br>8  | 0.53±0.1<br>8  | 0.54±0.1<br>8  | 0.56±0.1<br>8  | 0.61±0.2<br>0  | 0.68±0.2<br>0  | 0.61±0.1<br>7  | 0.55±0.1<br>6  | 0.49±0.1<br>4  | 0.41±0.1<br>3  |
| MFA 18:1,<br>Oleic Acid     | 10.63<br>±3.51 | 11.31±<br>3.46 | 12.11±3.<br>38 | 13.25±3.<br>24 | 14.92±3.<br>21 | 11.64±3.<br>72 | 12.05±3.<br>65 | 12.35±3.<br>58 | 12.68±3.<br>58 | 13.5±3.6<br>4  | 14.66±3.<br>21 | 13.52±3.<br>34 | 12.40±3.<br>43 | 11.37±3.<br>43 | 10.27±3.<br>32 |
| MFA 20:1                    | 0.09±<br>0.06  | 0.10±0.<br>05  | 0.10±0.0<br>5  | 0.11±0.0<br>5  | 0.12±0.0<br>4  | 0.10±0.0<br>6  | 0.10±0.0<br>5  | 0.10±0.0<br>5  | 0.10±0.0<br>5  | 0.11±0.0<br>5  | 0.11±0.0<br>5  | 0.10±0.0<br>5  | 0.10±0.0<br>5  | 0.10±0.0<br>5  | 0.10±0.0<br>6  |
| MFA 22:1                    | 0.01±<br>0.01  | 0.01±0.<br>01  | 0.01±0.0<br>1  |
| Total PFA                   | 6.49±<br>2.24  | 6.95±2.<br>27  | 7.36±2.3<br>3  | 7.87±2.3<br>5  | 8.42±2.4<br>0  | 6.97±2.3<br>5  | 7.23±2.3<br>2  | 7.41±2.3<br>5  | 7.58±2.3<br>9  | 7.9±2.55       | 8.02±2.3<br>9  | 7.79±2.4<br>4  | 7.39±2.3<br>9  | 7.09±2.3<br>9  | 6.80±2.2<br>5  |
| Omega 3<br>PFA              | 0.8±0.<br>32   | 0.84±0.<br>32  | 0.87±0.3<br>2  | 0.90±0.3<br>1  | 0.93±0.3       | 0.86±0.3<br>4  | 0.87±0.3<br>2  | 0.87±0.3<br>1  | 0.87±0.3<br>1  | 0.87±0.3<br>1  | 0.88±0.2<br>9  | 0.89±0.3<br>1  | 0.87±0.3<br>2  | 0.86±0.3<br>3  | 0.86±0.3<br>3  |
| Omega 6<br>PFA              | 5.65±<br>2.03  | 6.06±2.<br>05  | 6.44±2.1<br>0  | 6.90±2.1<br>2  | 7.40±2.1<br>5  | 6.06±2.1<br>1  | 6.31±2.0<br>9  | 6.48±2.1<br>2  | 6.65±2.1<br>6  | 6.96±2.3<br>0  | 7.07±2.1<br>5  | 6.83±2.1<br>9  | 6.46±2.1<br>5  | 6.17±2.1<br>5  | 5.90±2.0<br>4  |
| PFA 18:2,<br>Linoleic Acid  | 5.65±<br>2.03  | 6.06±2.<br>05  | 6.44±2.1       | 6.89±2.1<br>2  | 7.40±2.1<br>5  | 6.05±2.1<br>1  | 6.30±2.0<br>9  | 6.48±2.1<br>2  | 6.65±2.1<br>6  | 6.95±2.3<br>0  | 7.07±2.1<br>5  | 6.83±2.1<br>9  | 6.46±2.1<br>5  | 6.17±2.1<br>5  | 5.90±2.0<br>4  |
| PFA 18:3,<br>Linolenic Acid | 0.72±<br>0.30  | 0.75±0.<br>3   | 0.78±0.3       | 0.81±0.3       | 0.84±0.2<br>9  | 0.77±0.3<br>2  | 0.78±0.3<br>0  | 0.78±0.3<br>0  | 0.78±0.2<br>9  | 0.79±0.3<br>0  | 0.81±0.2<br>8  | 0.80±0.3<br>0  | 0.77±0.3<br>0  | 0.76±0.3<br>1  | 0.75±0.3<br>1  |
| PFA 18:4                    | 0.00±<br>0.00  | 0.00±0.<br>00  | 0.00±0.0<br>0  |

|                               |                              |               |               |                |               |               |                |                |                |               |               |               |               |                |                |                |
|-------------------------------|------------------------------|---------------|---------------|----------------|---------------|---------------|----------------|----------------|----------------|---------------|---------------|---------------|---------------|----------------|----------------|----------------|
| EPA                           | PFA 20:4                     | 0.05±0.02     | 0.05±0.03     | 0.06±0.03      | 0.07±0.03     | 0.08±0.04     | 0.06±0.03      | 0.06±0.03      | 0.06±0.03      | 0.06±0.03     | 0.07±0.03     | 0.06±0.03     | 0.06±0.03     | 0.06±0.03      | 0.06±0.03      | 0.05±0.03      |
|                               | PFA 20:5, dha                | 0.03±0.03     | 0.03±0.03     | 0.03±0.03      | 0.03±0.03     | 0.03±0.03     | 0.03±0.03      | 0.03±0.03      | 0.03±0.03      | 0.03±0.03     | 0.03±0.03     | 0.02±0.02     | 0.03±0.02     | 0.03±0.03      | 0.03±0.03      | 0.03±0.03      |
|                               | PFA 22:5                     | 0.01±0.01     | 0.01±0.01     | 0.01±0.01      | 0.01±0.01     | 0.01±0.01     | 0.01±0.01      | 0.01±0.01      | 0.01±0.01      | 0.01±0.01     | 0.01±0.01     | 0.01±0.01     | 0.01±0.01     | 0.01±0.01      | 0.01±0.01      | 0.01±0.01      |
|                               | PFA 22:6,                    | 0.05±0.06     | 0.06±0.06     | 0.05±0.05      | 0.05±0.05     | 0.05±0.05     | 0.06±0.06      | 0.06±0.05      | 0.05±0.05      | 0.05±0.05     | 0.05±0.05     | 0.04±0.04     | 0.05±0.05     | 0.05±0.05      | 0.06±0.06      | 0.07±0.06      |
|                               | Total Trans Fatty Acid, 161T | 1.97±1.05     | 2.19±1.12     | 2.42±1.08      | 2.73±1.05     | 3.16±1.00     | 2.23±1.09      | 2.38±1.03      | 2.48±1.04      | 2.59±1.06     | 2.79±1.07     | 3.11±1.03     | 2.78±1.01     | 2.49±1.01      | 2.22±1.06      | 1.88±1.08      |
| Alcohol                       | Trans Fatty Acid, 181T       | 0.02±0.02     | 0.02±0.02     | 0.02±0.02      | 0.03±0.02     | 0.04±0.03     | 0.02±0.02      | 0.02±0.02      | 0.02±0.02      | 0.03±0.02     | 0.03±0.02     | 0.04±0.03     | 0.03±0.02     | 0.02±0.02      | 0.02±0.02      | 0.01±0.01      |
|                               | Trans Fatty Acid, 182T       | 1.69±0.95     | 1.9±1.02      | 2.11±1.08      | 2.39±1.06     | 2.78±1.01     | 1.93±1.09      | 2.07±1.03      | 2.17±1.04      | 2.27±1.06     | 2.45±1.07     | 2.71±1.04     | 2.43±1.02     | 2.18±1.01      | 1.94±1.07      | 1.64±0.99      |
|                               | Water                        | 1205.2±400.57 | 1115±359.16   | 1029.63±316.97 | 937.65±285.66 | 820.45±262.19 | 1329.09±428.72 | 1114.40±295.12 | 1006.34±254.87 | 893.33±234.19 | 764.78±231.86 | 888.59±361.09 | 958.67±343.31 | 1026.78±343.01 | 1089.44±342.57 | 1144.46±325.01 |
|                               | Alcohol servings per week    | 6.43±9.68     | 3.63±5.98     | 2.87±5.50      | 2.36±4.97     | 1.77±4.08     | 7.05±9.96      | 4.06±6.13      | 2.89±5.23      | 1.96±4.33     | 1.09±3.20     | 2.31±5.28     | 3.02±6.05     | 3.62±6.89      | 3.95±7.06      | 4.15±7.09      |
|                               | Caffeine °                   | 2.85±4.31     | 1.65±2.8      | 1.33±2.65      | 1.11±2.44     | 0.85±2.03     | 3.17±4.49      | 1.86±2.88      | 1.34±2.51      | 0.92±2.11     | 0.52±1.58     | 1.07±2.50     | 1.39±2.83     | 1.66±3.18      | 1.80±3.24      | 1.88±3.25      |
| <b>Vitamins and Minerals</b>  |                              | 149.24±113.61 | 127.81±102.64 | 110.2±9.08     | 95.12±8.53    | 74.65±6.88    | 195.78±130.70  | 134.61±81.44   | 105.19±65.46   | 75.03±5.41    | 46.41±4.70    | 119.03±105.35 | 112.55±96.73  | 111.97±94.64   | 110.57±92.76   | 102.90±87.64   |
| Vitamin A (mcg RE/d/1000kcal) | Vitamin A                    | 715.11±324.11 | 720.93±319.73 | 699.97±313.2   | 656.8±82.89   | 570.17±255.31 | 728.78±344.64  | 708.01±302.57  | 689.37±295.22  | 662.03±283.37 | 574.79±272.15 | 506.73±235.24 | 606.05±264.23 | 672.23±287.55  | 746.17±307.84  | 831.80±317.67  |
|                               | Retinol °                    | 251.53±137.04 | 264.48±147.24 | 271.1±148.47   | 277.3±164.05  | 276.01±171.64 | 250.90±141.63  | 262.84±139.86  | 271.23±142.83  | 278.35±155.46 | 277.09±186.05 | 263.97±161.24 | 269.99±160.5  | 266.36±162.03  | 266.06±146.07  | 274.04±141.10  |
|                               | Thiamin °                    | 0.88±0.22     | 0.9±0.22      | 0.89±0.23      | 0.85±0.20     | 0.78±0.18     | 0.86±0.21      | 0.87±0.21      | 0.87±0.22      | 0.87±0.22     | 0.82±0.22     | 0.78±0.18     | 0.83±0.20     | 0.86±0.22      | 0.90±0.22      | 0.94±0.22      |
|                               | Riboflavin °                 | 1.35±0.39     | 1.33±0.38     | 1.28±0.37      | 1.21±0.33     | 1.07±0.29     | 1.37±0.39      | 1.30±0.35      | 1.26±0.35      | 1.22±0.36     | 1.10±0.35     | 1.12±0.32     | 1.19±0.34     | 1.25±0.37      | 1.30±0.38      | 1.38±0.39      |
|                               | Niacin °                     | 10.79±2.95    | 11.33±3.19    | 11.53±3.36     | 11.46±3.14    | 10.97±2.91    | 11.27±3.02     | 11.36±3.05     | 11.34±3.15     | 11.27±3.22    | 10.86±3.19    | 10.14±2.67    | 10.87±2.91    | 11.35±3.17     | 11.71±3.21     | 12.02±3.30     |
| Vitamin B6 °                  | Niacin Equivalents °         | 18.23±3.68    | 19.00±3.95    | 19.28±4.14     | 19.32±4.09    | 18.74±4.15    | 18.94±3.93     | 19.12±3.89     | 19.09±3.96     | 19.00±4.05    | 18.42±4.24    | 17.25±3.63    | 18.39±3.74    | 19.08±3.97     | 19.65±4.03     | 20.21±4.07     |
|                               | Pantothenic Acid °           | 3.65±1.39     | 3.62±1.45     | 3.49±1.51      | 3.24±1.28     | 2.83±1.04     | 3.80±1.36      | 3.55±1.31      | 3.42±1.35      | 3.23±1.38     | 2.82±1.27     | 2.83±1.09     | 3.15±1.23     | 3.40±1.39      | 3.61±1.42      | 3.84±1.48      |
|                               | Vitamin B6 °                 | 1.03±0.33     | 1.08±0.36     | 1.08±0.37      | 1.03±0.33     | 0.93±0.28     | 1.03±0.32      | 1.05±0.33      | 1.06±0.34      | 1.04±0.35     | 0.96±0.34     | 0.80±0.24     | 0.94±0.28     | 1.04±0.31      | 1.13±0.33      | 1.22±0.35      |
|                               | Vitamin B12 d                | 3.32±1.48     | 3.57±1.61     | 3.72±1.65      | 3.85±1.76     | 3.98±1.94     | 3.40±1.51      | 3.57±1.52      | 3.69±1.58      | 3.83±1.72     | 3.95±2.10     | 3.41±1.78     | 3.66±1.75     | 3.74±1.73      | 3.78±1.65      | 3.85±1.60      |

|                                                      |                    |                    |                    |                    |                    |                    |                    |                    |                   |                    |                    |                    |                    |                    |                    |
|------------------------------------------------------|--------------------|--------------------|--------------------|--------------------|--------------------|--------------------|--------------------|--------------------|-------------------|--------------------|--------------------|--------------------|--------------------|--------------------|--------------------|
| Natural Folate (food folate/d/1000kcal) <sup>d</sup> | 168.1<br>9±49.9    | 165.14<br>±47.32   | 156.85±<br>44.47   | 143.6±3<br>9.51    | 120.39±<br>34.62   | 170.72±<br>48.89   | 161.78±<br>44.66   | 154.38±<br>43.11   | 145.09±<br>41.92  | 122.21±<br>38.83   | 113.17±<br>33.04   | 135.76±<br>36.37   | 152.31±<br>40.53   | 167.86±<br>43.59   | 185.08±<br>43.82   |
| Vitamin C <sup>c</sup>                               | 73.91<br>±39.79    | 75.63±<br>40.84    | 71.85±3<br>9.24    | 62.84±3<br>4.63    | 48.6±27.<br>73     | 69.94±3<br>8.49    | 71.38±3<br>8.33    | 70.21±3<br>8.86    | 67.08±3<br>8.41   | 54.22±3<br>3.52    | 40.71±2<br>6.28    | 56.69±3<br>1.35    | 68.56±3<br>5.58    | 78.57±3<br>8.26    | 88.30±3<br>8.35    |
| Vitamin D <sup>d</sup>                               | 2.8±1.<br>77       | 2.86±1.<br>72      | 2.80±1.6<br>3      | 2.69±1.5<br>0      | 2.41±1.2<br>6      | 2.59±1.6<br>0      | 2.72±1.5<br>7      | 2.79±1.5<br>8      | 2.82±1.6<br>3     | 2.65±1.5<br>8      | 2.14±1.2<br>6      | 2.45±1.4<br>0      | 2.67±1.5<br>3      | 2.91±1.6<br>3      | 3.39±1.8<br>0      |
| Vitamin E (IU/d/1000kcal)                            | 5.91±<br>3.48      | 6.13±3.<br>78      | 6.17±4.0<br>6      | 5.88±3.3<br>8      | 5.39±2.6<br>1      | 5.92±3.2<br>2      | 6.04±3.4<br>6      | 6.07±3.6<br>6      | 5.98±3.7<br>6     | 5.48±3.3<br>8      | 5.09±2.5<br>7      | 5.63±3.1<br>8      | 6.00±3.6<br>6      | 6.25±3.7<br>7      | 6.51±4.0<br>0      |
| Alpha-Tocopherol <sup>c</sup>                        | 3.77±<br>1.68      | 3.88±1.<br>8       | 3.90±1.9<br>1      | 3.75±1.6<br>1      | 3.49±1.2<br>8      | 3.80±1.5<br>7      | 3.85±1.6<br>5      | 3.85±1.7<br>3      | 3.79±1.7<br>7     | 3.50±1.6<br>2      | 3.29±1.2<br>6      | 3.61±1.5<br>2      | 3.80±1.7<br>3      | 3.95±1.7<br>9      | 4.12±1.8<br>9      |
| Total Alpha-Toc Eq <sup>c</sup>                      | 4.99±<br>3.39      | 5.24±3.<br>71      | 5.35±4.0<br>0      | 5.14±3.3<br>2      | 4.80±2.5<br>5      | 5.03±3.1<br>4      | 5.18±3.3<br>9      | 5.25±3.5<br>9      | 5.21±3.7          | 4.84±3.3<br>2      | 4.53±2.5<br>2      | 4.94±3.1<br>3      | 5.20±3.6<br>1      | 5.35±3.7<br>1      | 5.49±3.9<br>4      |
| Natural Alpha-Tocopherol <sup>c</sup>                | 3.34±<br>0.85      | 3.39±0.<br>81      | 3.39±0.8<br>0      | 3.35±0.7<br>4      | 3.23±0.6<br>9      | 3.41±0.8<br>3      | 3.42±0.7<br>8      | 3.39±0.7<br>6      | 3.33±0.7<br>5     | 3.15±0.7<br>5      | 3.05±0.6<br>8      | 3.25±0.7<br>3      | 3.35±0.7<br>5      | 3.46±0.8<br>1      | 3.59±0.8<br>3      |
| Synthetic Alpha-Tocopherol <sup>c</sup>              | 0.95±<br>3.28      | 1.08±3.<br>63      | 1.12±3.9<br>3      | 0.88±3.2<br>3      | 0.58±2.4<br>2      | 0.85±3.0<br>2      | 0.95±3.2<br>9      | 1.02±3.5<br>0      | 1.01±3.6<br>3     | 0.78±3.2<br>2      | 0.55±2.4           | 0.79±3.0<br>5      | 1.02±3.5<br>3      | 1.10±3.6<br>3      | 1.17±3.8<br>6      |
| Beta-Tocopherol <sup>c</sup>                         | 0.16±<br>0.06      | 0.17±0.<br>06      | 0.17±0.0<br>6      | 0.17±0.0<br>6      | 0.17±0.0<br>6      | 0.16±0.0<br>5      | 0.17±0.0<br>6      | 0.17±0.0<br>6      | 0.17±0.0<br>6     | 0.17±0.0<br>6      | 0.16±0.0<br>6      | 0.16±0.0<br>6      | 0.17±0.0<br>6      | 0.17±0.0<br>6      | 0.18±0.0<br>6      |
| Delta-Tocopherol <sup>c</sup>                        | 1.08±<br>0.65      | 1.22±0.<br>70      | 1.34±0.7<br>4      | 1.48±0.8           | 1.62±0.8<br>3      | 1.21±0.7<br>3      | 1.30±0.7<br>6      | 1.36±0.7<br>7      | 1.40±0.7<br>8     | 1.45±0.7<br>9      | 1.52±0.7<br>9      | 1.45±0.7<br>8      | 1.36±0.7<br>7      | 1.26±0.7<br>5      | 1.14±0.7<br>0      |
| Gamma-Tocopherol <sup>c</sup>                        | 6.18±<br>2.83      | 6.83±3.<br>02      | 7.43±3.1<br>7      | 8.15±3.3<br>2      | 9.07±3.4<br>5      | 6.85±3.1<br>5      | 7.23±3.1<br>9      | 7.50±3.2<br>5      | 7.78±3.3<br>3     | 8.29±3.5           | 8.56±3.3<br>3      | 8.12±3.3<br>6      | 7.54±3.3<br>0      | 7.02±3.2<br>2      | 6.42±2.9<br>4      |
| Vitamin K (NDS Value) <sup>d</sup>                   | 63.79<br>±48.38    | 63.92±<br>47.55    | 62.51±4<br>5.4     | 58.82±3<br>8.12    | 50.14±2<br>9.00    | 65.93±4<br>8.96    | 63.56±4<br>4.19    | 61.38±4<br>3.63    | 58.85±4<br>0.51   | 49.45±3<br>2.17    | 43.56±2<br>6.59    | 52.79±3<br>6.88    | 59.26±3<br>9.86    | 67.20±4<br>8.43    | 76.37±4<br>9.48    |
| Calcium <sup>c</sup>                                 | 577.4<br>7±216.8   | 560.32<br>±210.54  | 527.97±<br>203.07  | 483.65±<br>183.89  | 409.75±<br>155.73  | 533.08±<br>205.09  | 530.72±<br>197.51  | 525.13±<br>201.29  | 511.22±<br>207.48 | 459.01±<br>200.88  | 419.10±<br>167.34  | 470.06±<br>182.72  | 507.76±<br>196.14  | 548.51±<br>204.03  | 613.72±<br>212.58  |
| Copper <sup>c</sup>                                  | 0.68±<br>0.16      | 0.68±0.<br>17      | 0.67±0.1<br>7      | 0.65±0.1<br>9      | 0.61±0.2<br>0      | 0.67±0.1<br>7      | 0.67±0.1<br>7      | 0.66±0.1<br>7      | 0.65±0.1<br>8     | 0.63±0.2<br>2      | 0.56±0.1<br>8      | 0.62±0.1<br>8      | 0.66±0.1<br>8      | 0.70±0.1<br>6      | 0.74±0.1<br>5      |
| Iron <sup>c</sup>                                    | 7.97±<br>2.47      | 8.17±2.<br>62      | 8.19±2.7<br>5      | 7.92±2.4<br>3      | 7.31±2.0<br>4      | 7.73±2.3<br>0      | 7.91±2.4<br>1      | 8.01±2.5<br>4      | 8.07±2.6<br>2     | 7.84±2.5<br>7      | 7.07±2.1<br>1      | 7.59±2.3<br>5      | 7.99±2.5<br>3      | 8.29±2.5<br>4      | 8.62±2.6<br>1      |
| Magnesium <sup>c</sup>                               | 180.0<br>8±35.11   | 174.88<br>±34.51   | 166.63±<br>32.9    | 154.49±<br>30.18   | 133.59±<br>27.71   | 177.08±<br>34.28   | 169.69±<br>33.35   | 164.31±<br>33.51   | 157.7±3<br>4.1    | 140.88±<br>35.11   | 126.19±<br>24.25   | 146.99±<br>25.14   | 162.10±<br>26.38   | 177.29±<br>28.33   | 197.10±<br>29.5    |
| Manganese <sup>c</sup>                               | 2.53±<br>0.73      | 2.28±0.<br>66      | 2.1±0.6            | 1.87±0.5<br>5      | 1.52±0.4<br>8      | 2.55±0.7<br>3      | 2.22±0.6<br>1      | 2.05±0.5<br>9      | 1.88±0.5<br>9     | 1.60±0.5<br>9      | 1.59±0.5<br>6      | 1.85±0.6<br>0      | 2.06±0.6<br>3      | 2.27±0.6<br>5      | 2.53±0.6<br>5      |
| Phosphorous <sup>c</sup>                             | 752.2<br>6±175.03  | 750.92<br>±170.55  | 732.6±1<br>62.89   | 708.65±<br>153.39  | 657.37±<br>138.9   | 736.47±<br>166.65  | 736.31±<br>159.08  | 730.1±1<br>60.48   | 719.68±<br>164.07 | 679.25±<br>165.03  | 618.90±<br>132.51  | 679.86±<br>139.82  | 718.91±<br>148.56  | 761.57±<br>157.38  | 822.58±<br>165.09  |
| Potassium <sup>c</sup>                               | 1859.<br>89±426.88 | 1815.5<br>1±412.04 | 1727.93<br>±387.83 | 1598.56<br>±353.23 | 1383.99<br>±319.35 | 1882.33<br>±416.07 | 1780.93<br>±382.86 | 1709.19<br>±375.94 | 1616.39<br>±376.7 | 1397.05<br>±370.72 | 1296.40<br>±295.03 | 1522.83<br>±308.63 | 1688.10<br>±335.03 | 1848.28<br>±359.56 | 2030.27<br>±360.14 |
| Selenium <sup>d</sup>                                | 53.88<br>±10.75    | 55.71±<br>10.88    | 56.51±1<br>0.94    | 57.83±1<br>1.36    | 57.96±1<br>2.49    | 55.49±1<br>1.21    | 56.33±1<br>0.83    | 56.48±1<br>0.87    | 56.84±1<br>1.26   | 56.74±1<br>2.69    | 53.21±1<br>1.43    | 55.52±1<br>1.16    | 56.58±1<br>1.01    | 57.63±1<br>1.29    | 58.95±1<br>1.28    |

|                                 |                   |                   |                   |                   |                   |                   |                   |                   |                   |                   |                   |                   |                   |                   |                   |
|---------------------------------|-------------------|-------------------|-------------------|-------------------|-------------------|-------------------|-------------------|-------------------|-------------------|-------------------|-------------------|-------------------|-------------------|-------------------|-------------------|
| Sodium <sup>c</sup>             | 1637.7±306.31     | 1673.95±292.14    | 1688.42±288.29    | 1707.1±283.09     | 1694.6±296.79     | 1686.07±309.87    | 1695.03±285.18    | 1688.04±284.25    | 1680.28±283.26    | 1652.35±306.4     | 1654.46±303.67    | 1682.87±294.43    | 1692.13±293.11    | 1699.65±293.78    | 1672.67±284.57    |
| Zinc <sup>c</sup>               | 6.47±2.12         | 6.73±2.3          | 6.85±2.47         | 6.8±2.26          | 6.69±2.17         | 6.66±2.09         | 6.77±2.17         | 6.81±2.29         | 6.78±2.36         | 6.54±2.41         | 5.91±1.91         | 6.47±2.09         | 6.81±2.31         | 7.05±2.35         | 7.31±2.39         |
| <b>Bioactives</b>               |                   |                   |                   |                   |                   |                   |                   |                   |                   |                   |                   |                   |                   |                   |                   |
| Total carotenoids               | 7810.54 ± 4273.75 | 7807.54 ± 4294.25 | 7495.03 ± 4171.15 | 6853.16 ± 3667.98 | 5549.34 ± 2995.46 | 7901.67 ± 4341.41 | 7622.46 ± 4022.16 | 7313.57 ± 3940.93 | 6931.63 ± 3844.56 | 5746.31 ± 3463.92 | 4862.60 ± 2745.43 | 6202.39 ± 3437.90 | 7214.05 ± 3788.73 | 8199.10 ± 4284.53 | 9037.48 ± 4159.67 |
| Alpha-Carotene <sup>d</sup>     | 529.42±423.38     | 523.23±413.15     | 489.69±405.16     | 429.74±336.98     | 332.46±253.77     | 578.68±474.36     | 522.37±391.75     | 473.46±359.21     | 418.7±326.04      | 311.34±251.32     | 276.98±271.69     | 382.32±305.58     | 461.76±350.47     | 547.85±402.15     | 635.62±434.86     |
| Beta-Carotene <sup>d</sup>      | 2461.44±1683.56   | 2420.89±1612.9    | 2275.49±1547.43   | 2016.33±1300.09   | 1563.77±1018.52   | 2525.71±1765.48   | 2356.92±1514.15   | 2220.56±1468.7    | 2043.55±1350.36   | 1591.19±1096.82   | 1289.21±928.21    | 1783.70±1216.51   | 2153.74±1374.41   | 2548.49±1577.92   | 2962.78±1640.36   |
| Beta-Cryptoxanthin <sup>d</sup> | 110.8±68.25       | 112.46±69.99      | 105.94±66.86      | 91.76±58.43       | 70.03±45.62       | 104.49±65.87      | 105.92±65.49      | 103.3±65.5        | 98.47±65.12       | 78.82±55.87       | 57.88±45.31       | 83.19±54.13       | 101.32±61.77      | 116.61±65.79      | 131.98±65.67      |
| Lycopene <sup>d</sup>           | 3374.85±2040.42   | 3437.29±2129.94   | 3363.12±2127.97   | 3181.78±2032.62   | 2713.38±1761.83   | 3354.82±1947.2    | 3358.21±1971.65   | 3291.62±2001.81   | 3210.51±2115.97   | 2855.27±2115.31   | 2498.71±1699.81   | 2973.78±1903.67   | 3328.50±2049.25   | 3599.11±2193.25   | 3670.33±2086.04   |
| Lutein+Zeaxanthin <sup>d</sup>  | 1334.04±1252.67   | 1313.65±1246.34   | 1260.79±1191.6    | 1133.56±988.33    | 869.71±728.4      | 1337.97±1275.73   | 1279.04±1155.27   | 1224.63±1144.83   | 1160.4±1057.13    | 909.7±834.19      | 739.81±667.81     | 979.39±954.86     | 1168.73±1041.86   | 1387.04±1267.53   | 1636.77±1288.75   |
| Oxalic Acid <sup>c</sup>        | 230.37±98.19      | 224.85±95.22      | 213.01±90.73      | 192.46±78.03      | 156.33±62.58      | 231.55±99.18      | 219.22±88.83      | 208.65±86.97      | 195.48±83.8       | 162.11±73.55      | 141.62±56.76      | 177.75±71.65      | 204.75±81.59      | 232.32±91.79      | 260.57±92.41      |
| Phytic Acid <sup>c</sup>        | 392.52±135.8      | 382.96±125.86     | 364.87±119.28     | 335.92±109.76     | 287.5±95.31       | 370.57±123.36     | 366.54±119.94     | 358.99±120.95     | 348.65±122.02     | 319±126.48        | 273.86±93.52      | 318.84±102.88     | 350.54±110.07     | 384.39±116.26     | 436.13±128.56     |
| <b>Isoflavones<sup>c</sup></b>  |                   |                   |                   |                   |                   |                   |                   |                   |                   |                   |                   |                   |                   |                   |                   |
| Total isoflavones               | 1.44 ± 3.87       | 1.15 ± 3.26       | 0.94 ± 2.63       | 0.76 ± 2.20       | 0.55 ± 1.42       | 1.09 ± 2.53       | 0.99 ± 2.66       | 0.95 ± 2.91       | 0.90 ± 2.73       | 0.91 ± 3.23       | 0.59 ± 1.19       | 0.72 ± 1.78       | 0.84 ± 2.21       | 1.07 ± 2.88       | 1.62 ± 4.63       |
| Biochanin A                     | 0.01±0.01         | 0.01±0.01         | 0.01±0.01         | 0.01±0.01         | 0.00±0.01         | 0.01±0.01         | 0.01±0.01         | 0.01±0.01         | 0.01±0.01         | 0.00±0.01         | 0.00±0.01         | 0.00±0.01         | 0.01±0.01         | 0.01±0.01         | 0.01±0.01         |
| Coumestrol                      | 0.06±0.04         | 0.05±0.04         | 0.04±0.03         | 0.04±0.03         | 0.03±0.02         | 0.07±0.05         | 0.05±0.03         | 0.04±0.02         | 0.03±0.02         | 0.02±0.01         | 0.04±0.04         | 0.04±0.04         | 0.04±0.04         | 0.04±0.03         | 0.04±0.03         |
| Daidzein                        | 0.60±1.46         | 0.48±1.23         | 0.39±0.98         | 0.32±0.82         | 0.23±0.53         | 0.48±0.96         | 0.42±1.01         | 0.40±1.1          | 0.36±1.02         | 0.35±1.2          | 0.26±0.45         | 0.31±0.66         | 0.36±0.82         | 0.44±1.07         | 0.65±1.76         |
| Formononetin                    | 0.00±0.01         | 0.00±0.00         | 0.00±0.00         | 0.00±0.00         | 0.00±0.00         | 0.00±0.00         | 0.00±0.00         | 0.00±0.00         | 0.00±0.00         | 0.00±0.00         | 0.00±0.00         | 0.00±0.00         | 0.00±0.00         | 0.00±0.00         | 0.00±0.01         |
| Genistein                       | 0.71±2.16         | 0.56±1.82         | 0.45±1.48         | 0.36±1.23         | 0.26±0.79         | 0.48±1.41         | 0.46±1.48         | 0.46±1.62         | 0.45±1.52         | 0.48±1.81         | 0.27±0.66         | 0.34±1.00         | 0.40±1.24         | 0.52±1.61         | 0.82±2.58         |
| Glycitein                       | 0.07±0.25         | 0.05±0.22         | 0.04±0.18         | 0.03±0.15         | 0.02±0.1          | 0.04±0.17         | 0.04±0.17         | 0.05±0.19         | 0.05±0.18         | 0.05±0.22         | 0.02±0.08         | 0.03±0.13         | 0.04±0.15         | 0.05±0.20         | 0.09±0.30         |
| Ash                             | 10.39±1.73        | 10.31±1.66        | 10.05±1.58        | 9.69±1.50         | 9.02±1.45         | 10.63±1.75        | 10.25±1.53        | 9.99±1.49         | 9.66±1.48         | 8.94±1.54         | 8.82±1.46         | 9.47±1.45         | 9.93±1.49         | 10.39±1.56        | 10.86±1.55        |

a.EDIH, empirical dietary index for hyperinsulinemia score assessing the ability of the dietary pattern to contribute to insulin hypersecretion - higher EDIH scores reflect more hyperinsulinemic dietary patterns;  
EDIP, empirical dietary inflammatory pattern score assessing the ability of the dietary pattern to contribute to chronic systemic inflammation - higher EDIP scores reflect more pro-inflammatory dietary patterns;

HEI-2015, healthy eating index-2015 assessing adherence to the 2015-2020 Dietary Guidelines for Americans - higher HEI-2015 scores are indicative of greater adherence and higher dietary quality. EDIH and EDIP are positively correlated, whereas both scores are inversely correlated with HEI-2015, i.e., more hyperinsulinemic or pro-inflammatory dietary patterns are of lower dietary quality. Each dietary score was adjusted for total energy intake using the residual method. All nutrients listed are from dietary sources.

- b. nutrients were g/d/1000kcal
- c. nutrients were mg/d/1000kcal
- d. nutrients were mcg/d/1000kcal

**Supplementary Table S5. Hazard ratios (95% CI) for the associations of dietary patterns with total and site-specific cancers, further adjusted for body mass index and type 2 diabetes<sup>a</sup>**

| Dietary pattern                                       | Cancer site <sup>b</sup> /statistical model | Quintile 1 | Quintile 2               | Quintile 3               | Quintile 4               | Quintile 5               | P for linear trend <sup>c</sup> | 1-SD increment in dietary score | P for continuous dietary score <sup>d</sup> |
|-------------------------------------------------------|---------------------------------------------|------------|--------------------------|--------------------------|--------------------------|--------------------------|---------------------------------|---------------------------------|---------------------------------------------|
| <b>Total cancer (except non-melanoma skin cancer)</b> |                                             |            |                          |                          |                          |                          |                                 |                                 |                                             |
|                                                       | <b>Cases/non cases</b>                      | 3934/18559 | 3861/18633               | 3772/18722               | 3594/18900               | 3607/18886               |                                 |                                 |                                             |
| EDIH                                                  | MV BMI-adjusted                             | 1          | <b>1.04 (0.99, 1.09)</b> | <b>1.06 (1.01, 1.11)</b> | <b>1.03 (0.98, 1.08)</b> | <b>1.07 (1.02, 1.12)</b> | 0.0216                          | <b>1.02 (1.00, 1.03)</b>        | 0.0499                                      |
| EDIH                                                  | MV DIAB-adjusted                            | 1          | <b>1.04 (1.00, 1.09)</b> | <b>1.06 (1.01, 1.11)</b> | <b>1.04 (1.00, 1.10)</b> | <b>1.09 (1.04, 1.15)</b> | 0.0011                          | <b>1.02 (1.01, 1.04)</b>        | 0.0032                                      |
|                                                       | <b>Cases/non cases</b>                      | 4131/18362 | 4027/18467               | 3703/18791               | 3608/18886               | 3299/19194               |                                 |                                 |                                             |
| EDIP                                                  | MV BMI-adjusted                             | 1          | <b>1.06 (1.01, 1.11)</b> | <b>1.02 (0.97, 1.07)</b> | <b>1.06 (1.00, 1.12)</b> | <b>1.06 (1.00, 1.12)</b> | 0.0786                          | <b>1.03 (1.01, 1.05)</b>        | 0.01                                        |
| EDIP                                                  | MV DIAB-adjusted                            | 1          | <b>1.06 (1.01, 1.11)</b> | <b>1.02 (0.97, 1.08)</b> | <b>1.07 (1.01, 1.13)</b> | <b>1.08 (1.02, 1.14)</b> | 0.0188                          | <b>1.03 (1.01, 1.06)</b>        | 0.0014                                      |
|                                                       | <b>Cases/non cases</b>                      | 3697/18796 | 3740/18753               | 3786/18708               | 3750/18743               | 3795/18698               |                                 |                                 |                                             |
| HEI-2015                                              | MV BMI-adjusted                             | 1          | 0.98 (0.94, 1.03)        | 0.97 (0.93, 1.02)        | <b>0.95 (0.90, 0.99)</b> | <b>0.95 (0.90, 0.99)</b> | 0.0086                          | <b>0.97 (0.96, 0.99)</b>        | 0.0006                                      |
| HEI-2015                                              | MV DIAB-adjusted                            | 1          | 0.98 (0.93, 1.02)        | 0.97 (0.92, 1.01)        | <b>0.94 (0.89, 0.98)</b> | <b>0.93 (0.89, 0.98)</b> | 0.0006                          | <b>0.97 (0.95, 0.98)</b>        | <.0001                                      |
| <b>Colorectal cancer</b>                              |                                             |            |                          |                          |                          |                          |                                 |                                 |                                             |
|                                                       | <b>Cases/non cases</b>                      | 301/21146  | 309/21139                | 372/21075                | 306/21142                | 320/21127                |                                 |                                 |                                             |
| EDIH                                                  | MV BMI-adjusted                             | 1          | 1.06 (0.89, 1.24)        | 1.29 (1.10, 1.52)        | 1.05 (0.88, 1.25)        | 1.14 (0.95, 1.36)        | 0.2100                          | <b>1.05 (0.99, 1.11)</b>        | 0.1084                                      |
| EDIH                                                  | MV DIAB-adjusted                            | 1          | 1.05 (0.89, 1.24)        | 1.30 (1.10, 1.53)        | 1.07 (0.90, 1.28)        | <b>1.19 (1.00, 1.42)</b> | 0.0698                          | <b>1.06 (1.00, 1.12)</b>        | 0.0348                                      |
|                                                       | <b>Cases/non cases</b>                      | 315/21132  | 333/21115                | 338/21109                | 319/21129                | 303/21144                |                                 |                                 |                                             |
| EDIP                                                  | MV BMI-adjusted                             | 1          | 1.13 (0.95, 1.34)        | 1.17 (0.98, 1.41)        | 1.17 (0.96, 1.42)        | 1.18 (0.96, 1.46)        | 0.1295                          | <b>1.07 (0.99, 1.15)</b>        | 0.0891                                      |
| EDIP                                                  | MV DIAB-adjusted                            | 1          | <b>1.15 (0.97, 1.36)</b> | 1.21 (1.01, 1.45)        | 1.21 (0.99, 1.47)        | <b>1.25 (1.01, 1.54)</b> | 0.0437                          | <b>1.08 (1.01, 1.17)</b>        | 0.0304                                      |
|                                                       | <b>Cases/non cases</b>                      | 342/21105  | 337/21110                | 316/21131                | 297/21150                | 316/21131                |                                 |                                 |                                             |
| HEI-2015                                              | MV BMI-adjusted                             | 1          | 0.97 (0.83, 1.13)        | 0.92 (0.78, 1.08)        | <b>0.84 (0.72, 1.00)</b> | <b>0.88 (0.75, 1.04)</b> | 0.0468                          | <b>0.94 (0.89, 0.99)</b>        | 0.0271                                      |

|          |                                         |           |                          |                          |                          |                          |        |                          |        |
|----------|-----------------------------------------|-----------|--------------------------|--------------------------|--------------------------|--------------------------|--------|--------------------------|--------|
| HEI-2015 | MV DIAB-adjusted<br><b>Colon cancer</b> | 1         | 0.95 (0.82, 1.11)        | 0.91 (0.78, 1.06)        | <b>0.83 (0.70, 0.97)</b> | <b>0.85 (0.72, 1.00)</b> | 0.0153 | <b>0.93 (0.88, 0.98)</b> | 0.007  |
|          | <b>Cases/non cases</b>                  | 250/21217 | 264/21203                | 312/21155                | 254/21213                | 266/21201                |        |                          |        |
| EDIH     | MV BMI-adjusted                         | 1         | 1.09 (0.91, 1.30)        | 1.32 (1.10, 1.58)        | 1.06 (0.88, 1.29)        | 1.16 (0.95, 1.41)        | 0.2156 | <b>1.06 (0.99, 1.12)</b> | 0.0755 |
| EDIH     | MV DIAB-adjusted                        | 1         | 1.08 (0.90, 1.30)        | 1.32 (1.11, 1.59)        | 1.08 (0.89, 1.31)        | <b>1.21 (1.00, 1.47)</b> | 0.0829 | <b>1.07 (1.01, 1.14)</b> | 0.0259 |
|          | <b>Cases/non cases</b>                  | 260/21207 | 286/21181                | 279/21188                | 266/21201                | 255/21212                |        |                          |        |
| EDIP     | MV BMI-adjusted                         | 1         | 1.18 (0.98, 1.42)        | 1.18 (0.97, 1.44)        | 1.20 (0.96, 1.48)        | <b>1.23 (0.98, 1.55)</b> | 0.1022 | <b>1.08 (1.00, 1.17)</b> | 0.0569 |
| EDIP     | MV DIAB-adjusted                        | 1         | <b>1.19 (0.99, 1.44)</b> | <b>1.21 (0.99, 1.48)</b> | <b>1.23 (0.99, 1.53)</b> | <b>1.30 (1.03, 1.64)</b> | 0.0394 | <b>1.10 (1.02, 1.20)</b> | 0.02   |
|          | <b>Cases/non cases</b>                  | 285/21181 | 284/21183                | 264/21203                | 249/21218                | 264/21202                |        |                          |        |
| HEI-2015 | MV BMI-adjusted                         | 1         | 0.97 (0.82, 1.15)        | 0.91 (0.77, 1.08)        | <b>0.83 (0.70, 0.99)</b> | <b>0.86 (0.72, 1.03)</b> | 0.03   | <b>0.93 (0.88, 0.99)</b> | 0.0203 |
| HEI-2015 | MV DIAB-adjusted                        | 1         | 0.95 (0.80, 1.13)        | 0.90 (0.76, 1.07)        | <b>0.81 (0.67, 0.96)</b> | <b>0.82 (0.69, 0.99)</b> | 0.0085 | <b>0.92 (0.87, 0.98)</b> | 0.0047 |
|          | <b>Proximal colon cancer</b>            |           |                          |                          |                          |                          |        |                          |        |
|          | <b>Cases/non cases</b>                  | 141/21362 | 160/21344                | 204/21299                | 155/21349                | 168/21335                |        |                          |        |
| EDIH     | MV BMI-adjusted                         | 1         | 1.16 (0.92, 1.47)        | 1.53 (1.22, 1.93)        | 1.16 (0.91, 1.49)        | <b>1.36 (1.05, 1.75)</b> | 0.0359 | <b>1.10 (1.02, 1.18)</b> | 0.0161 |
| EDIH     | MV DIAB-adjusted                        | 1         | 1.16 (0.92, 1.48)        | 1.55 (1.23, 1.96)        | 1.18 (0.92, 1.52)        | <b>1.41 (1.10, 1.82)</b> | 0.0142 | <b>1.11 (1.03, 1.20)</b> | 0.0074 |
|          | <b>Cases/non cases</b>                  | 147/21356 | 185/21319                | 178/21325                | 160/21344                | 158/21345                |        |                          |        |
| EDIP     | MV BMI-adjusted                         | 1         | 1.35 (1.06, 1.72)        | 1.32 (1.02, 1.71)        | 1.27 (0.96, 1.68)        | <b>1.37 (1.01, 1.85)</b> | 0.1001 | <b>1.08 (0.97, 1.20)</b> | 0.1476 |
| EDIP     | MV DIAB-adjusted                        | 1         | 1.38 (1.08, 1.75)        | 1.36 (1.05, 1.76)        | 1.30 (0.98, 1.72)        | <b>1.42 (1.05, 1.92)</b> | 0.0636 | <b>1.09 (0.98, 1.21)</b> | 0.0996 |
|          | <b>Cases/non cases</b>                  | 173/21330 | 176/21327                | 169/21334                | 151/21352                | 159/21344                |        |                          |        |
| HEI-2015 | MV BMI-adjusted                         | 1         | 0.97 (0.78, 1.20)        | 0.93 (0.74, 1.15)        | <b>0.80 (0.63, 1.00)</b> | <b>0.82 (0.65, 1.04)</b> | 0.0323 | <b>0.94 (0.87, 1.01)</b> | 0.0858 |
| HEI-2015 | MV DIAB-adjusted                        | 1         | 0.94 (0.76, 1.17)        | 0.92 (0.74, 1.14)        | <b>0.78 (0.62, 0.98)</b> | <b>0.80 (0.63, 1.00)</b> | 0.0172 | <b>0.93 (0.86, 1.00)</b> | 0.0428 |
|          | <b>Distal colon and rectal cancer</b>   |           |                          |                          |                          |                          |        |                          |        |
|          | <b>Cases/non cases</b>                  | 127/21406 | 116/21418                | 132/21401                | 119/21415                | 133/21400                |        |                          |        |
| EDIH     | MV BMI-adjusted                         | 1         | 0.90 (0.69, 1.18)        | 0.95 (0.73, 1.25)        | 0.91 (0.69, 1.20)        | 1.00 (0.76, 1.33)        | 0.9318 | 1.01 (0.92, 1.10)        | 0.8816 |
| EDIH     | MV DIAB-adjusted                        | 1         | 0.90 (0.69, 1.18)        | 1.00 (0.76, 1.31)        | 0.95 (0.72, 1.26)        | 1.09 (0.82, 1.45)        | 0.4564 | 1.03 (0.94, 1.13)        | 0.4677 |
|          | <b>Cases/non cases</b>                  | 141/21392 | 109/21425                | 119/21414                | 131/21403                | 127/21406                |        |                          |        |



|          |                               |            |                          |                          |                          |                          |            |                          |        |
|----------|-------------------------------|------------|--------------------------|--------------------------|--------------------------|--------------------------|------------|--------------------------|--------|
| EDIP     | MV BMI-adjusted               | 1          | 0.79 (0.60, 1.05)        | 0.86 (0.64, 1.14)        | 1.00 (0.73, 1.35)        | 0.97 (0.70, 1.36)        | 0.768<br>8 | 1.07 (0.95, 1.21)        | 0.2646 |
| EDIP     | MV DIAB-adjusted              | 1          | 0.81 (0.62, 1.08)        | 0.91 (0.68, 1.22)        | 1.03 (0.76, 1.41)        | 1.06 (0.76, 1.47)        | 0.458<br>6 | <b>1.10 (0.98, 1.24)</b> | 0.1137 |
|          | <b>Cases/non cases</b>        | 136/21397  | 138/21395                | 114/21419                | 117/21416                | 122/21411                |            |                          |        |
| HEI-2015 | MV BMI-adjusted               | 1          | 1.03 (0.80, 1.33)        | 0.91 (0.70, 1.18)        | 0.89 (0.69, 1.17)        | 0.97 (0.74, 1.27)        | 0.534<br>6 | 0.96 (0.88, 1.05)        | 0.3734 |
| HEI-2015 | MV DIAB-adjusted              | 1          | 1.02 (0.79, 1.32)        | 0.88 (0.67, 1.14)        | 0.87 (0.67, 1.14)        | 0.91 (0.69, 1.19)        | 0.268<br>8 | <b>0.94 (0.86, 1.03)</b> | 0.166  |
|          | <b>Intestinal polyps</b>      |            |                          |                          |                          |                          |            |                          |        |
|          | <b>Cases/non cases</b>        | 1991/18700 | 2030/18662               | 2134/18558               | 2211/18481               | 2308/18383               |            |                          |        |
| EDIH     | MV BMI-adjusted               | 1          | <b>1.05 (0.98, 1.12)</b> | <b>1.13 (1.06, 1.21)</b> | <b>1.16 (1.09, 1.24)</b> | <b>1.18 (1.10, 1.27)</b> | <.000<br>1 | <b>1.06 (1.04, 1.08)</b> | <.0001 |
| EDIH     | MV DIAB-adjusted              | 1          | <b>1.05 (0.98, 1.12)</b> | <b>1.14 (1.07, 1.22)</b> | <b>1.18 (1.11, 1.27)</b> | <b>1.22 (1.14, 1.31)</b> | <.000<br>1 | <b>1.07 (1.05, 1.09)</b> | <.0001 |
|          | <b>Cases/non cases</b>        | 2143/18548 | 2144/18548               | 2113/18579               | 2081/18611               | 2193/18498               |            |                          |        |
| EDIP     | MV BMI-adjusted               | 1          | <b>1.05 (0.98, 1.12)</b> | <b>1.06 (0.99, 1.14)</b> | <b>1.07 (0.99, 1.15)</b> | <b>1.13 (1.04, 1.22)</b> | 0.005<br>5 | <b>1.05 (1.02, 1.08)</b> | 0.0011 |
| EDIP     | MV DIAB-adjusted              | 1          | <b>1.05 (0.98, 1.12)</b> | <b>1.08 (1.00, 1.16)</b> | <b>1.08 (1.00, 1.17)</b> | <b>1.16 (1.07, 1.26)</b> | 0.000<br>6 | <b>1.06 (1.03, 1.09)</b> | <.0001 |
|          | <b>Cases/non cases</b>        | 2307/18384 | 2223/18468               | 2172/18520               | 2075/18616               | 1896/18795               |            |                          |        |
| HEI-2015 | MV BMI-adjusted               | 1          | 0.98 (0.92, 1.04)        | 0.96 (0.90, 1.02)        | <b>0.91 (0.86, 0.97)</b> | <b>0.86 (0.80, 0.92)</b> | <.000<br>1 | <b>0.95 (0.93, 0.97)</b> | <.0001 |
| HEI-2015 | MV DIAB-adjusted              | 1          | 0.96 (0.91, 1.02)        | <b>0.94 (0.88, 1.00)</b> | <b>0.89 (0.84, 0.95)</b> | <b>0.84 (0.78, 0.89)</b> | <.000<br>1 | <b>0.94 (0.92, 0.96)</b> | <.0001 |
|          | <b>Invasive Breast cancer</b> |            |                          |                          |                          |                          |            |                          |        |
|          | <b>Cases/non cases</b>        | 899/17565  | 921/17544                | 827/17637                | 843/17622                | 903/17561                |            |                          |        |
| EDIH     | MV BMI-adjusted               | 1          | 1.08 (0.98, 1.19)        | 1.00 (0.91, 1.11)        | 1.04 (0.94, 1.15)        | <b>1.14 (1.02, 1.26)</b> | 0.045<br>8 | <b>1.03 (0.99, 1.06)</b> | 0.1074 |
| EDIH     | MV DIAB-adjusted              | 1          | 1.09 (0.99, 1.20)        | 1.02 (0.92, 1.12)        | 1.06 (0.96, 1.18)        | <b>1.19 (1.07, 1.32)</b> | 0.003<br>4 | <b>1.04 (1.01, 1.08)</b> | 0.0103 |
|          | <b>Cases/non cases</b>        | 926/17538  | 936/17529                | 874/17590                | 866/17599                | 791/17673                |            |                          |        |
| EDIP     | MV BMI-adjusted               | 1          | 1.09 (0.98, 1.20)        | 1.06 (0.95, 1.18)        | 1.11 (0.99, 1.25)        | 1.09 (0.96, 1.23)        | 0.178<br>5 | <b>1.04 (0.99, 1.08)</b> | 0.1053 |
| EDIP     | MV DIAB-adjusted              | 1          | 1.09 (0.99, 1.20)        | 1.07 (0.96, 1.19)        | <b>1.13 (1.01, 1.27)</b> | <b>1.12 (0.99, 1.27)</b> | 0.058      | <b>1.05 (1.00, 1.10)</b> | 0.0281 |
|          | <b>Cases/non cases</b>        | 872/17592  | 867/17597                | 847/17617                | 869/17595                | 938/17526                |            |                          |        |
| HEI-2015 | MV BMI-adjusted               | 1          | 0.96 (0.87, 1.05)        | 0.92 (0.84, 1.01)        | 0.94 (0.85, 1.04)        | 1.02 (0.92, 1.13)        | 0.873<br>9 | 1.00 (0.97, 1.04)        | 0.8875 |
| HEI-2015 | MV DIAB-adjusted              | 1          | 0.95 (0.86, 1.04)        | 0.90 (0.82, 1.00)        | 0.92 (0.83, 1.01)        | 0.99 (0.90, 1.09)        | 0.607<br>1 | 0.99 (0.96, 1.02)        | 0.5792 |

|            |                        |           |                      |                      |                      |                              |            |                              |        |
|------------|------------------------|-----------|----------------------|----------------------|----------------------|------------------------------|------------|------------------------------|--------|
| <b>ER+</b> |                        |           |                      |                      |                      |                              |            |                              |        |
|            | <b>Cases/non cases</b> | 745/17792 | 747/17790            | 685/17852            | 688/17849            | 714/17823                    |            |                              |        |
| EDIH       | MV BMI-adjusted        | 1         | 1.07 (0.97,<br>1.19) | 1.02 (0.92,<br>1.14) | 1.04 (0.93,<br>1.17) | <b>1.10 (0.98,<br/>1.24)</b> | 0.163<br>9 | 1.01 (0.98,<br>1.05)         | 0.4995 |
| EDIH       | MV DIAB-adjusted       | 1         | 1.08 (0.97,<br>1.20) | 1.04 (0.93,<br>1.16) | 1.07 (0.96,<br>1.20) | <b>1.16 (1.04,<br/>1.31)</b> | 0.016<br>4 | <b>1.03 (1.00,<br/>1.07)</b> | 0.089  |
|            | <b>Cases/non cases</b> | 769/17768 | 768/17769            | 726/17811            | 704/17833            | 612/17925                    |            |                              |        |
| EDIP       | MV BMI-adjusted        | 1         | 1.08 (0.97,<br>1.21) | 1.08 (0.96,<br>1.21) | 1.11 (0.98,<br>1.26) | 1.04 (0.90,<br>1.19)         | 0.485<br>1 | 1.02 (0.97,<br>1.06)         | 0.5082 |
| EDIP       | MV DIAB-adjusted       | 1         | 1.09 (0.98,<br>1.22) | 1.09 (0.97,<br>1.23) | 1.14 (1.00,<br>1.29) | 1.08 (0.94,<br>1.24)         | 0.194<br>4 | <b>1.03 (0.98,<br/>1.08)</b> | 0.2051 |
|            | <b>Cases/non cases</b> | 694/17842 | 692/17845            | 695/17841            | 720/17817            | 778/17758                    |            |                              |        |
| HEI-2015   | MV BMI-adjusted        | 1         | 0.96 (0.86,<br>1.06) | 0.95 (0.85,<br>1.06) | 0.98 (0.88,<br>1.09) | 1.06 (0.95,<br>1.19)         | 0.268<br>7 | 1.02 (0.98,<br>1.06)         | 0.3057 |
| HEI-2015   | MV DIAB-adjusted       | 1         | 0.95 (0.85,<br>1.05) | 0.93 (0.84,<br>1.04) | 0.95 (0.86,<br>1.06) | 1.03 (0.92,<br>1.14)         | 0.678<br>8 | 1.01 (0.97,<br>1.04)         | 0.7569 |
| <b>ER-</b> |                        |           |                      |                      |                      |                              |            |                              |        |
|            | <b>Cases/non cases</b> | 100/18600 | 123/18577            | 105/18595            | 100/18600            | 127/18573                    |            |                              |        |
| EDIH       | MV BMI-adjusted        | 1         | 1.22 (0.93,<br>1.60) | 1.05 (0.79,<br>1.41) | 1.02 (0.76,<br>1.38) | <b>1.34 (1.00,<br/>1.80)</b> | 0.145<br>5 | <b>1.12 (1.02,<br/>1.22)</b> | 0.0198 |
| EDIH       | MV DIAB-adjusted       | 1         | 1.22 (0.93,<br>1.60) | 1.05 (0.79,<br>1.40) | 1.01 (0.75,<br>1.36) | <b>1.30 (0.97,<br/>1.75)</b> | 0.206<br>3 | <b>1.10 (1.01,<br/>1.21)</b> | 0.0344 |
|            | <b>Cases/non cases</b> | 108/18592 | 104/18596            | 106/18594            | 124/18576            | 113/18587                    |            |                              |        |
| EDIP       | MV BMI-adjusted        | 1         | 0.98 (0.74,<br>1.31) | 1.02 (0.75,<br>1.40) | 1.24 (0.90,<br>1.71) | 1.20 (0.85,<br>1.71)         | 0.157<br>5 | <b>1.12 (0.99,<br/>1.26)</b> | 0.0719 |
| EDIP       | MV DIAB-adjusted       | 1         | 0.98 (0.73,<br>1.31) | 1.02 (0.75,<br>1.39) | 1.23 (0.89,<br>1.70) | 1.18 (0.83,<br>1.67)         | 0.191<br>8 | <b>1.11 (0.98,<br/>1.25)</b> | 0.0909 |
|            | <b>Cases/non cases</b> | 123/18576 | 110/18590            | 107/18592            | 104/18596            | 111/18588                    |            |                              |        |
| HEI-2015   | MV BMI-adjusted        | 1         | 0.86 (0.67,<br>1.12) | 0.82 (0.63,<br>1.07) | 0.79 (0.60,<br>1.03) | 0.84 (0.64,<br>1.11)         | 0.146<br>8 | 0.95 (0.87,<br>1.04)         | 0.298  |
| HEI-2015   | MV DIAB-adjusted       | 1         | 0.86 (0.67,<br>1.12) | 0.82 (0.63,<br>1.07) | 0.79 (0.60,<br>1.04) | 0.85 (0.64,<br>1.11)         | 0.165<br>2 | 0.96 (0.87,<br>1.05)         | 0.3257 |
| <b>PR+</b> |                        |           |                      |                      |                      |                              |            |                              |        |
|            | <b>Cases/non cases</b> | 626/17945 | 636/17935            | 588/17983            | 575/17996            | 604/17967                    |            |                              |        |
| EDIH       | MV BMI-adjusted        | 1         | 1.10 (0.98,<br>1.23) | 1.06 (0.94,<br>1.20) | 1.05 (0.93,<br>1.19) | <b>1.13 (1.00,<br/>1.28)</b> | 0.126      | <b>1.02 (0.98,<br/>1.06)</b> | 0.3071 |
| EDIH       | MV DIAB-adjusted       | 1         | 1.11 (0.99,<br>1.24) | 1.08 (0.96,<br>1.22) | 1.09 (0.96,<br>1.23) | <b>1.20 (1.06,<br/>1.36)</b> | 0.008      | <b>1.04 (1.00,<br/>1.08)</b> | 0.0309 |
|            | <b>Cases/non cases</b> | 648/17923 | 649/17922            | 635/17936            | 597/17974            | 500/18071                    |            |                              |        |
| EDIP       | MV BMI-adjusted        | 1         | 1.11 (0.99,<br>1.25) | 1.15 (1.02,<br>1.31) | 1.16 (1.01,<br>1.32) | 1.04 (0.89,<br>1.21)         | 0.421<br>5 | 1.02 (0.96,<br>1.07)         | 0.5488 |
| EDIP       | MV DIAB-adjusted       | 1         | 1.12 (1.00,<br>1.26) | 1.17 (1.03,<br>1.33) | 1.18 (1.03,<br>1.36) | 1.09 (0.94,<br>1.27)         | 0.140<br>7 | <b>1.03 (0.98,<br/>1.09)</b> | 0.1983 |

|          |                        |           |                   |                   |                   |                          |            |                          |        |
|----------|------------------------|-----------|-------------------|-------------------|-------------------|--------------------------|------------|--------------------------|--------|
|          | <b>Cases/non cases</b> | 597/17973 | 580/17991         | 593/17977         | 615/17956         | 644/17926                |            |                          |        |
| HEI-2015 | MV BMI-adjusted        | 1         | 0.93 (0.83, 1.05) | 0.94 (0.84, 1.06) | 0.97 (0.87, 1.09) | 1.02 (0.91, 1.15)        | 0.606<br>7 | 1.01 (0.97, 1.05)        | 0.6053 |
| HEI-2015 | MV DIAB-adjusted       | 1         | 0.92 (0.82, 1.04) | 0.92 (0.82, 1.03) | 0.94 (0.84, 1.06) | 0.98 (0.87, 1.10)        | 0.787<br>8 | 0.99 (0.96, 1.03)        | 0.7714 |
|          | <b>PR-</b>             |           |                   |                   |                   |                          |            |                          |        |
|          | <b>Cases/non cases</b> | 206/18464 | 222/18448         | 195/18475         | 204/18466         | 225/18445                |            |                          |        |
| EDIH     | MV BMI-adjusted        | 1         | 1.08 (0.89, 1.31) | 0.97 (0.79, 1.19) | 1.03 (0.83, 1.27) | 1.17 (0.95, 1.45)        | 0.219<br>3 | <b>1.05 (0.98, 1.13)</b> | 0.1383 |
| EDIH     | MV DIAB-adjusted       | 1         | 1.08 (0.89, 1.31) | 0.96 (0.78, 1.19) | 1.02 (0.83, 1.26) | 1.16 (0.94, 1.43)        | 0.261<br>8 | <b>1.05 (0.98, 1.12)</b> | 0.1711 |
|          | <b>Cases/non cases</b> | 220/18450 | 214/18456         | 182/18488         | 222/18448         | 214/18456                |            |                          |        |
| EDIP     | MV BMI-adjusted        | 1         | 0.96 (0.79, 1.18) | 0.83 (0.66, 1.04) | 1.04 (0.83, 1.32) | 1.07 (0.83, 1.37)        | 0.516<br>3 | <b>1.06 (0.97, 1.16)</b> | 0.201  |
| EDIP     | MV DIAB-adjusted       | 1         | 0.96 (0.79, 1.18) | 0.83 (0.66, 1.04) | 1.04 (0.83, 1.31) | 1.06 (0.82, 1.36)        | 0.553<br>7 | <b>1.06 (0.97, 1.16)</b> | 0.2208 |
|          | <b>Cases/non cases</b> | 212/18457 | 212/18458         | 204/18465         | 199/18471         | 225/18444                |            |                          |        |
| HEI-2015 | MV BMI-adjusted        | 1         | 0.96 (0.79, 1.16) | 0.91 (0.74, 1.10) | 0.87 (0.72, 1.07) | 0.98 (0.80, 1.20)        | 0.591<br>1 | 0.99 (0.93, 1.06)        | 0.7876 |
| HEI-2015 | MV DIAB-adjusted       | 1         | 0.96 (0.79, 1.16) | 0.90 (0.74, 1.10) | 0.87 (0.72, 1.07) | 0.98 (0.81, 1.20)        | 0.599<br>1 | 0.99 (0.93, 1.06)        | 0.7932 |
|          | <b>HER2+</b>           |           |                   |                   |                   |                          |            |                          |        |
|          | <b>Cases/non cases</b> | 86/18628  | 85/18629          | 86/18628          | 85/18629          | 100/18614                |            |                          |        |
| EDIH     | MV BMI-adjusted        | 1         | 0.99 (0.73, 1.35) | 1.02 (0.74, 1.40) | 1.01 (0.73, 1.40) | 1.21 (0.87, 1.68)        | 0.244<br>4 | <b>1.08 (0.97, 1.19)</b> | 0.1506 |
| EDIH     | MV DIAB-adjusted       | 1         | 0.99 (0.73, 1.35) | 1.03 (0.75, 1.41) | 1.02 (0.74, 1.42) | 1.23 (0.89, 1.70)        | 0.189<br>8 | <b>1.09 (0.98, 1.20)</b> | 0.1113 |
|          | <b>Cases/non cases</b> | 81/18633  | 97/18617          | 91/18623          | 86/18628          | 87/18627                 |            |                          |        |
| EDIP     | MV BMI-adjusted        | 1         | 1.25 (0.91, 1.72) | 1.20 (0.85, 1.70) | 1.19 (0.82, 1.73) | 1.26 (0.85, 1.88)        | 0.351<br>3 | 1.08 (0.95, 1.24)        | 0.2447 |
| EDIP     | MV DIAB-adjusted       | 1         | 1.25 (0.91, 1.72) | 1.21 (0.86, 1.71) | 1.20 (0.83, 1.74) | 1.28 (0.86, 1.91)        | 0.307<br>5 | 1.09 (0.95, 1.25)        | 0.2062 |
|          | <b>Cases/non cases</b> | 97/18616  | 84/18630          | 84/18629          | 90/18624          | 87/18626                 |            |                          |        |
| HEI-2015 | MV BMI-adjusted        | 1         | 0.85 (0.63, 1.14) | 0.85 (0.63, 1.15) | 0.92 (0.68, 1.24) | 0.91 (0.67, 1.24)        | 0.672<br>1 | 0.98 (0.88, 1.08)        | 0.6887 |
| HEI-2015 | MV DIAB-adjusted       | 1         | 0.84 (0.63, 1.13) | 0.84 (0.62, 1.13) | 0.91 (0.68, 1.22) | 0.89 (0.66, 1.22)        | 0.578<br>9 | 0.97 (0.88, 1.08)        | 0.5902 |
|          | <b>HER2-</b>           |           |                   |                   |                   |                          |            |                          |        |
|          | <b>Cases/non cases</b> | 698/17957 | 708/17948         | 639/18016         | 647/18009         | 660/17995                |            |                          |        |
| EDIH     | MV BMI-adjusted        | 1         | 1.09 (0.98, 1.21) | 1.02 (0.91, 1.14) | 1.05 (0.94, 1.18) | <b>1.10 (0.97, 1.24)</b> | 0.223<br>8 | 1.02 (0.98, 1.06)        | 0.3173 |
| EDIH     | MV DIAB-adjusted       | 1         | 1.09 (0.98, 1.22) | 1.03 (0.92, 1.16) | 1.08 (0.96, 1.21) | <b>1.15 (1.02, 1.29)</b> | 0.043<br>2 | <b>1.04 (1.00, 1.07)</b> | 0.0686 |

|          |                        |           |                   |                   |                   |                          |            |                          |        |
|----------|------------------------|-----------|-------------------|-------------------|-------------------|--------------------------|------------|--------------------------|--------|
|          | <b>Cases/non cases</b> | 726/17929 | 722/17934         | 665/17990         | 660/17996         | 579/18076                |            |                          |        |
| EDIP     | MV BMI-adjusted        | 1         | 1.09 (0.97, 1.22) | 1.05 (0.93, 1.19) | 1.11 (0.98, 1.27) | 1.05 (0.91, 1.22)        | 0.403<br>3 | 1.02 (0.98, 1.08)        | 0.3273 |
| EDIP     | MV DIAB-adjusted       | 1         | 1.09 (0.98, 1.22) | 1.06 (0.94, 1.20) | 1.13 (0.99, 1.29) | 1.09 (0.95, 1.26)        | 0.188<br>7 | <b>1.04 (0.99, 1.09)</b> | 0.1405 |
|          | <b>Cases/non cases</b> | 654/18000 | 652/18003         | 662/17993         | 657/17998         | 727/17928                |            |                          |        |
| HEI-2015 | MV BMI-adjusted        | 1         | 0.96 (0.86, 1.06) | 0.95 (0.86, 1.06) | 0.94 (0.84, 1.05) | 1.04 (0.93, 1.17)        | 0.615<br>9 | 1.01 (0.97, 1.05)        | 0.6315 |
| HEI-2015 | MV DIAB-adjusted       | 1         | 0.95 (0.85, 1.06) | 0.94 (0.84, 1.05) | 0.92 (0.82, 1.03) | 1.01 (0.90, 1.13)        | 0.945<br>6 | 1.00 (0.96, 1.04)        | 0.9115 |
|          | <b>ER- PR- HER2+</b>   |           |                   |                   |                   |                          |            |                          |        |
|          | <b>Cases/non cases</b> | 25/18707  | 23/18710          | 25/18707          | 25/18708          | 22/18710                 |            |                          |        |
| EDIH     | MV BMI-adjusted        | 1         | 0.92 (0.52, 1.65) | 1.02 (0.57, 1.84) | 1.03 (0.56, 1.88) | 0.92 (0.49, 1.75)        | 0.903<br>6 | 1.00 (0.82, 1.22)        | 0.9904 |
| EDIH     | MV DIAB-adjusted       | 1         | 0.92 (0.51, 1.65) | 1.01 (0.56, 1.82) | 1.01 (0.55, 1.82) | 0.88 (0.47, 1.67)        | 0.793<br>1 | 0.98 (0.81, 1.20)        | 0.8749 |
|          | <b>Cases/non cases</b> | 19/18713  | 31/18702          | 21/18711          | 25/18708          | 24/18708                 |            |                          |        |
| EDIP     | MV BMI-adjusted        | 1         | 1.89 (1.01, 3.53) | 1.37 (0.67, 2.80) | 1.73 (0.82, 3.64) | 1.79 (0.80, 3.97)        | 0.260<br>4 | 1.06 (0.82, 1.38)        | 0.6553 |
| EDIP     | MV DIAB-adjusted       | 1         | 1.88 (1.00,3.51)  | 1.35 (0.66, 2.77) | 1.70 (0.81, 3.58) | 1.73 (0.78, 3.83)        | 0.299<br>6 | 1.05(0.81, 1.36)         | 0.7207 |
|          | <b>Cases/non cases</b> | 30/18701  | 22/18710          | 23/18709          | 23/18709          | 22/18710                 |            |                          |        |
| HEI-2015 | MV BMI-adjusted        | 1         | 0.72 (0.41, 1.25) | 0.74 (0.43, 1.29) | 0.75 (0.43, 1.32) | 0.74 (0.41, 1.32)        | 0.324<br>3 | 0.92 (0.76, 1.12)        | 0.4273 |
| HEI-2015 | MV DIAB-adjusted       | 1         | 0.72 (0.42, 1.26) | 0.75 (0.43, 1.31) | 0.76 (0.44, 1.34) | 0.76 (0.42, 1.36)        | 0.373<br>1 | 0.93 (0.77, 1.13)        | 0.4854 |
|          | <b>Luminal A</b>       |           |                   |                   |                   |                          |            |                          |        |
|          | <b>Cases/non cases</b> | 640/18026 | 625/18041         | 575/18091         | 582/18084         | 576/18090                |            |                          |        |
| EDIH     | MV BMI-adjusted        | 1         | 1.06 (0.94, 1.18) | 1.01 (0.90, 1.14) | 1.05 (0.93, 1.18) | 1.06 (0.93, 1.20)        | 0.464<br>8 | 1.00 (0.96, 1.04)        | 0.8666 |
| EDIH     | MV DIAB-adjusted       | 1         | 1.06 (0.95, 1.19) | 1.03 (0.91, 1.16) | 1.08 (0.96, 1.22) | <b>1.11 (0.98, 1.26)</b> | 0.103<br>4 | 1.02 (0.98, 1.06)        | 0.2814 |
|          | <b>Cases/non cases</b> | 660/18006 | 655/18011         | 599/18067         | 577/18089         | 507/18159                |            |                          |        |
| EDIP     | MV BMI-adjusted        | 1         | 1.09 (0.97, 1.23) | 1.06 (0.93, 1.20) | 1.09 (0.95, 1.25) | 1.04 (0.89, 1.20)        | 0.625<br>8 | 1.01 (0.96, 1.07)        | 0.5888 |
| EDIP     | MV DIAB-adjusted       | 1         | 1.10 (0.98, 1.24) | 1.07 (0.94, 1.22) | 1.11 (0.97, 1.28) | 1.08 (0.93, 1.26)        | 0.307<br>3 | 1.03 (0.98, 1.08)        | 0.2782 |
|          | <b>Cases/non cases</b> | 579/18086 | 582/18084         | 593/18072         | 593/18073         | 651/18014                |            |                          |        |
| HEI-2015 | MV BMI-adjusted        | 1         | 0.96 (0.86, 1.08) | 0.96 (0.86, 1.08) | 0.96 (0.85, 1.08) | 1.05 (0.94, 1.19)        | 0.481<br>5 | 1.01 (0.97, 1.05)        | 0.5700 |
| HEI-2015 | MV DIAB-adjusted       | 1         | 0.95 (0.85, 1.07) | 0.95 (0.84, 1.06) | 0.93 (0.83, 1.05) | 1.02 (0.90, 1.14)        | 0.926<br>6 | 1.00 (0.96, 1.04)        | 0.9482 |
|          | <b>Luminal B</b>       |           |                   |                   |                   |                          |            |                          |        |

|          |                                  |           |                   |                   |                          |                          |            |                          |        |
|----------|----------------------------------|-----------|-------------------|-------------------|--------------------------|--------------------------|------------|--------------------------|--------|
|          | <b>Cases/non cases</b>           | 59/18662  | 61/18660          | 60/18662          | 59/18662                 | 76/18645                 |            |                          |        |
| EDIH     | MV BMI-adjusted                  | 1         | 1.04 (0.72, 1.51) | 1.05 (0.72, 1.53) | 1.04 (0.70, 1.52)        | 1.35 (0.92, 1.98)        | 0.141<br>8 | <b>1.11 (0.99, 1.25)</b> | 0.0827 |
| EDIH     | MV DIAB-adjusted                 | 1         | 1.05 (0.72, 1.51) | 1.06 (0.72, 1.54) | 1.05 (0.71, 1.54)        | <b>1.39 (0.95, 2.04)</b> | 0.092<br>7 | <b>1.13 (1.00, 1.27)</b> | 0.0497 |
|          | <b>Cases/non cases</b>           | 61/18660  | 65/18656          | 69/18653          | 59/18662                 | 61/18660                 |            |                          |        |
| EDIP     | MV BMI-adjusted                  | 1         | 1.06 (0.73, 1.55) | 1.14 (0.77, 1.69) | 1.01 (0.65, 1.56)        | 1.08 (0.68, 1.71)        | 0.839<br>7 | 1.08 (0.92, 1.27)        | 0.3545 |
| EDIP     | MV DIAB-adjusted                 | 1         | 1.07 (0.73, 1.56) | 1.15 (0.77, 1.71) | 1.02 (0.66, 1.58)        | 1.11 (0.70, 1.76)        | 0.742      | 1.09 (0.93, 1.28)        | 0.2858 |
|          | <b>Cases/non cases</b>           | 65/18655  | 59/18662          | 60/18661          | 67/18654                 | 64/18656                 |            |                          |        |
| HEI-2015 | MV BMI-adjusted                  | 1         | 0.89 (0.62, 1.27) | 0.91 (0.64, 1.31) | 1.03 (0.72, 1.47)        | 1.01 (0.70, 1.46)        | 0.769<br>8 | 1.02 (0.90, 1.15)        | 0.7911 |
| HEI-2015 | MV DIAB-adjusted                 | 1         | 0.88 (0.62, 1.26) | 0.90 (0.63, 1.28) | 1.01 (0.71, 1.44)        | 0.97 (0.68, 1.41)        | 0.911<br>4 | 1.00 (0.89, 1.13)        | 0.9397 |
|          | <b>Triple negative</b>           |           |                   |                   |                          |                          |            |                          |        |
|          | <b>Cases/non cases</b>           | 57/18672  | 83/18647          | 61/18668          | 63/18667                 | 84/18645                 |            |                          |        |
| EDIH     | MV BMI-adjusted                  | 1         | 1.43 (1.01, 2.02) | 1.06 (0.72, 1.54) | 1.10 (0.74, 1.62)        | <b>1.52 (1.04, 2.21)</b> | 0.115<br>9 | <b>1.16 (1.04, 1.31)</b> | 0.0086 |
| EDIH     | MV DIAB-adjusted                 | 1         | 1.43 (1.01, 2.02) | 1.05 (0.72, 1.54) | 1.09 (0.74, 1.60)        | <b>1.48 (1.01, 2.15)</b> | 0.152<br>3 | <b>1.15 (1.03, 1.29)</b> | 0.0138 |
|          | <b>Cases/non cases</b>           | 66/18663  | 65/18665          | 65/18664          | 81/18649                 | 7/18658                  |            |                          |        |
| EDIP     | MV BMI-adjusted                  | 1         | 0.97 (0.67, 1.40) | 0.98 (0.66, 1.45) | 1.24 (0.83, 1.86)        | 1.14 (0.73, 1.78)        | 0.346<br>1 | 1.11 (0.95, 1.30)        | 0.1842 |
| EDIP     | MV DIAB-adjusted                 | 1         | 0.97 (0.67, 1.40) | 0.98 (0.66, 1.45) | 1.23 (0.82, 1.85)        | 1.12 (0.72, 1.75)        | 0.386<br>5 | 1.10 (0.95, 1.29)        | 0.2103 |
|          | <b>Cases/non cases</b>           | 75/18653  | 70/18659          | 69/18660          | 61/18668                 | 73/18656                 |            |                          |        |
| HEI-2015 | MV BMI-adjusted                  | 1         | 0.91 (0.66, 1.27) | 0.89 (0.64, 1.24) | 0.77 (0.54, 1.09)        | 0.92 (0.65, 1.30)        | 0.419<br>5 | 0.98 (0.87, 1.09)        | 0.6646 |
| HEI-2015 | MV DIAB-adjusted                 | 1         | 0.91 (0.66, 1.26) | 0.89 (0.64, 1.24) | 0.77 (0.54, 1.10)        | 0.93 (0.66, 1.31)        | 0.441      | 0.98 (0.87, 1.09)        | 0.6879 |
|          | <b>Invasive ductal carcinoma</b> |           |                   |                   |                          |                          |            |                          |        |
|          | <b>Cases/non cases</b>           | 463/18127 | 482/18108         | 474/18116         | 478/18112                | 500/18090                |            |                          |        |
| EDIH     | MV BMI-adjusted                  | 1         | 1.06 (0.93, 1.21) | 1.07 (0.94, 1.22) | 1.09 (0.95, 1.25)        | <b>1.15 (1.00, 1.33)</b> | 0.059<br>2 | <b>1.04 (0.99, 1.08)</b> | 0.1274 |
| EDIH     | MV DIAB-adjusted                 | 1         | 1.07 (0.94, 1.22) | 1.08 (0.94, 1.24) | <b>1.11 (0.96, 1.27)</b> | <b>1.20 (1.04, 1.38)</b> | 0.013<br>7 | <b>1.05 (1.00, 1.10)</b> | 0.0329 |
|          | <b>Cases/non cases</b>           | 489/18101 | 512/18078         | 465/18125         | 492/18098                | 439/18151                |            |                          |        |
| EDIP     | MV BMI-adjusted                  | 1         | 1.07 (0.94, 1.22) | 1.00 (0.86, 1.15) | 1.10 (0.94, 1.28)        | 1.02 (0.86, 1.21)        | 0.728<br>4 | <b>1.04 (0.98, 1.10)</b> | 0.2443 |
| EDIP     | MV DIAB-adjusted                 | 1         | 1.08 (0.94, 1.22) | 1.00 (0.87, 1.16) | 1.11 (0.95, 1.30)        | 1.05 (0.89, 1.25)        | 0.492<br>6 | <b>1.05 (0.99, 1.10)</b> | 0.1248 |
|          | <b>Cases/non cases</b>           | 459/18130 | 485/18105         | 450/18139         | 506/18084                | 497/18092                |            |                          |        |

|                                   |                        |           |                          |                          |                          |                          |                    |                          |               |
|-----------------------------------|------------------------|-----------|--------------------------|--------------------------|--------------------------|--------------------------|--------------------|--------------------------|---------------|
| HEI-2015                          | MV BMI-adjusted        | 1         | 1.02 (0.90, 1.16)        | 0.95 (0.83, 1.08)        | 1.07 (0.94, 1.22)        | 1.07 (0.93, 1.22)        | 0.282<br>6         | 1.03 (0.98, 1.07)        | 0.2598        |
| HEI-2015                          | MV DIAB-adjusted       | 1         | 1.02 ( 0.89, 1.16)       | 0.93 (0.82, 1.06)        | 1.05 (0.92, 1.19)        | 1.04 ( 0.90, 1.18)       | 0.545<br>5         | 1.01 (0.97, 1.06)        | 0.5239        |
| <b>Invasive lobular carcinoma</b> |                        |           |                          |                          |                          |                          |                    |                          |               |
|                                   | <b>Cases/non cases</b> | 87/18630  | 81/18637                 | 65/18653                 | 68/18650                 | 81/18637                 |                    |                          |               |
| EDIH                              | MV BMI-adjusted        | 1         | 1.03 (0.76, 1.41)        | 0.88 (0.62, 1.23)        | 0.95 (0.67, 1.34)        | 1.18 (0.84, 1.66)        | 0.463<br>4         | <b>1.09 (0.98, 1.22)</b> | 0.1108        |
| EDIH                              | MV DIAB-adjusted       | 1         | <b>1.04 (0.76, 1.42)</b> | <b>0.88 (0.63, 1.24)</b> | <b>0.97 (0.69, 1.37)</b> | <b>1.22 (0.87, 1.72)</b> | <b>0.340<br/>6</b> | <b>1.10 (0.99, 1.23)</b> | <b>0.0697</b> |
|                                   | <b>Cases/non cases</b> | 96/18621  | 62/18656                 | 89/18629                 | 64/18654                 | 71/18647                 |                    |                          |               |
| EDIP                              | MV BMI-adjusted        | 1         | 0.69 (0.49, 0.97)        | 1.04 (0.75, 1.46)        | 0.80 (0.54, 1.16)        | 0.96 (0.65, 1.44)        | 0.988              | 0.99 (0.86, 1.14)        | 0.8901        |
| EDIP                              | MV DIAB-adjusted       | 1         | 0.70 (0.49, 0.98)        | 1.05 (0.76, 1.47)        | 0.81 (0.55, 1.18)        | 0.99 (0.67, 1.48)        | 0.903<br>9         | 1.00 (0.87, 1.16)        | 0.9977        |
|                                   | <b>Cases/non cases</b> | 80/18637  | 57/18660                 | 77/18641                 | 82/18635                 | 86/18631                 |                    |                          |               |
| HEI-2015                          | MV BMI-adjusted        | 1         | 0.67 (0.48, 0.94)        | 0.88 (0.64, 1.21)        | 0.91 (0.66, 1.25)        | 0.94 (0.68, 1.30)        | 0.810<br>7         | 1.02 (0.92, 1.14)        | 0.7076        |
| HEI-2015                          | MV DIAB-adjusted       | 1         | 0.66 (0.47, 0.93)        | 0.87 (0.63, 1.19)        | 0.89 (0.65, 1.23)        | 0.91 (0.66, 1.26)        | 0.958<br>7         | 1.01 (0.90, 1.13)        | 0.8594        |
| <b>Localized</b>                  |                        |           |                          |                          |                          |                          |                    |                          |               |
|                                   | <b>Cases/non cases</b> | 622/17931 | 633/17921                | 580/17974                | 582/17972                | 615/17938                |                    |                          |               |
| EDIH                              | MV BMI-adjusted        | 1         | 1.08 (0.96, 1.21)        | 1.02 (0.91, 1.16)        | 1.05 (0.93, 1.18)        | <b>1.14 (1.00, 1.29)</b> | 0.084<br>5         | <b>1.04 (1.00, 1.08)</b> | 0.034         |
| EDIH                              | MV DIAB-adjusted       | 1         | 1.08 (0.97, 1.21)        | 1.03 (0.92, 1.16)        | 1.07 (0.94, 1.20)        | <b>1.18 (1.04, 1.33)</b> | 0.020<br>3         | <b>1.06 (1.02, 1.10)</b> | 0.0064        |
|                                   | <b>Cases/non cases</b> | 630/17923 | 658/17896                | 597/17957                | 606/17948                | 541/18012                |                    |                          |               |
| EDIP                              | MV BMI-adjusted        | 1         | 1.13 (1.00, 1.27)        | 1.07 (0.94, 1.22)        | 1.15 (1.01, 1.32)        | 1.11 (0.96, 1.29)        | 0.173<br>2         | <b>1.04 (0.99, 1.10)</b> | 0.125         |
| EDIP                              | MV DIAB-adjusted       | 1         | 1.13 (1.01, 1.28)        | 1.08 (0.95, 1.23)        | <b>1.17 (1.02, 1.34)</b> | <b>1.14 (0.98, 1.32)</b> | 0.085<br>9         | <b>1.05 (1.00, 1.11)</b> | 0.0564        |
|                                   | <b>Cases/non cases</b> | 584/17969 | 595/17958                | 597/17956                | 598/17955                | 658/17895                |                    |                          |               |
| HEI-2015                          | MV BMI-adjusted        | 1         | 0.98 (0.87, 1.09)        | 0.96 (0.86, 1.08)        | 0.95 (0.85, 1.07)        | 1.05 (0.94, 1.19)        | 0.539<br>8         | 1.01 (0.97, 1.05)        | 0.5121        |
| HEI-2015                          | MV DIAB-adjusted       | 1         | 0.97 (0.86, 1.08)        | 0.95 (0.84, 1.07)        | 0.94 (0.83, 1.06)        | 1.03 (0.91, 1.16)        | 0.866<br>4         | 1.00 (0.97, 1.04)        | 0.8458        |
| <b>Regional/distant</b>           |                        |           |                          |                          |                          |                          |                    |                          |               |
|                                   | <b>Cases/non cases</b> | 219/18440 | 230/18430                | 199/18460                | 215/18445                | 229/18430                |                    |                          |               |
| EDIH                              | MV BMI-adjusted        | 1         | 1.09 (0.90, 1.31)        | 0.97 (0.79, 1.19)        | 1.06 (0.86, 1.30)        | 1.13 (0.92, 1.39)        | 0.329              | 0.98 (0.92, 1.05)        | 0.6611        |
| EDIH                              | MV DIAB-adjusted       | 1         | 1.09 (0.90, 1.32)        | 0.98 (0.80, 1.21)        | 1.09 (0.89, 1.34)        | <b>1.20 (0.97, 1.47)</b> | 0.109<br>5         | 1.01 (0.94, 1.08)        | 0.8315        |
|                                   | <b>Cases/non cases</b> | 234/18425 | 220/18440                | 224/18435                | 219/18441                | 195/18464                |                    |                          |               |

|              |                           |           |                      |                      |                              |                              |            |                              |        |
|--------------|---------------------------|-----------|----------------------|----------------------|------------------------------|------------------------------|------------|------------------------------|--------|
| EDIP         | MV BMI-adjusted           | 1         | 0.99 (0.81,<br>1.21) | 1.06 (0.85,<br>1.31) | 1.08 (0.86,<br>1.36)         | 1.01 (0.79,<br>1.30)         | 0.709<br>4 | 1.01 (0.93,<br>1.11)         | 0.7472 |
| EDIP         | MV DIAB-adjusted          | 1         | 1.00 (0.82,<br>1.22) | 1.07 (0.86,<br>1.32) | 1.11 (0.88,<br>1.39)         | 1.06 (0.83,<br>1.36)         | 0.458<br>6 | 1.03 (0.95,<br>1.13)         | 0.477  |
|              | <b>Cases/non cases</b>    | 226/18433 | 216/18443            | 201/18458            | 220/18439                    | 229/18430                    |            |                              |        |
| HEI-<br>2015 | MV BMI-adjusted           | 1         | 0.94 (0.78,<br>1.13) | 0.87 (0.72,<br>1.05) | 0.95 (0.78,<br>1.16)         | 1.01 (0.83,<br>1.23)         | 0.943<br>1 | 1.00 (0.94,<br>1.06)         | 0.9592 |
| HEI-<br>2015 | MV DIAB-adjusted          | 1         | 0.92 (0.77,<br>1.12) | 0.85 (0.70,<br>1.03) | 0.92 (0.76,<br>1.12)         | 0.96 (0.79,<br>1.17)         | 0.692<br>1 | 0.98 (0.92,<br>1.05)         | 0.5934 |
|              | <b>Endometrial cancer</b> |           |                      |                      |                              |                              |            |                              |        |
|              | <b>Cases/non cases</b>    | 74/8946   | 88/8932              | 79/8942              | 73/8947                      | 89/8931                      |            |                              |        |
| EDIH         | MV BMI-adjusted           | 1         | 1.23 (0.89,<br>1.69) | 1.12 (0.80,<br>1.57) | 1.04 (0.73,<br>1.48)         | 1.18 (0.84,<br>1.68)         | 0.584<br>5 | 1.02 (0.92,<br>1.13)         | 0.7764 |
| EDIH         | MV DIAB-adjusted          | 1         | 1.30 (0.94,<br>1.79) | 1.24 (0.89,<br>1.73) | 1.23 (0.87,<br>1.75)         | 1.60 (1.14,<br>2.26)         | 0.015<br>4 | <b>1.12 (1.01,<br/>1.24)</b> | 0.0297 |
|              | <b>Cases/non cases</b>    | 81/8939   | 93/8927              | 67/8954              | 84/8936                      | 78/8942                      |            |                              |        |
| EDIP         | MV BMI-adjusted           | 1         | 1.17 (0.85,<br>1.62) | 0.87 (0.60,<br>1.25) | 1.12 (0.77,<br>1.64)         | 1.11 (0.74,<br>1.68)         | 0.723<br>8 | 1.06 (0.92,<br>1.22)         | 0.4114 |
| EDIP         | MV DIAB-adjusted          | 1         | 1.22 (0.88,<br>1.68) | 0.94 (0.65,<br>1.36) | <b>1.27 (0.87,<br/>1.85)</b> | <b>1.38 (0.91,<br/>2.07)</b> | 0.160<br>5 | <b>1.15 (1.00,<br/>1.33)</b> | 0.0524 |
|              | <b>Cases/non cases</b>    | 67/8953   | 84/8936              | 98/8923              | 81/8939                      | 73/8947                      |            |                              |        |
| HEI-<br>2015 | MV BMI-adjusted           | 1         | 1.23 (0.89,<br>1.71) | 1.41 (1.03,<br>1.94) | 1.17 (0.84,<br>1.63)         | 1.09 (0.77,<br>1.55)         | 0.700<br>6 | 1.02 (0.92,<br>1.14)         | 0.6501 |
| HEI-<br>2015 | MV DIAB-adjusted          | 1         | 1.15 (0.84,<br>1.59) | 1.26 (0.92,<br>1.73) | 1.00 (0.72,<br>1.40)         | 0.87 (0.62,<br>1.23)         | 0.289<br>1 | 0.95 (0.85,<br>1.05)         | 0.3008 |
|              | <b>Endometrioid</b>       |           |                      |                      |                              |                              |            |                              |        |
|              | <b>Cases/non cases</b>    | 49/9148   | 50/9147              | 53/9145              | 52/9145                      | 62/9135                      |            |                              |        |
| EDIH         | MV BMI-adjusted           | 1         | 1.08 (0.72,<br>1.61) | 1.16 (0.77,<br>1.76) | 1.15 (0.75,<br>1.75)         | 1.25 (0.82,<br>1.91)         | 0.296<br>5 | 1.05 (0.93,<br>1.19)         | 0.449  |
| EDIH         | MV DIAB-adjusted          | 1         | 1.14 (0.76,<br>1.72) | 1.30 (0.86,<br>1.95) | 1.36 (0.90,<br>2.08)         | <b>1.72 (1.13,<br/>2.60)</b> | 0.007<br>6 | <b>1.16 (1.03,<br/>1.32)</b> | 0.0157 |
|              | <b>Cases/non cases</b>    | 54/9143   | 59/9138              | 42/9156              | 55/9142                      | 56/9141                      |            |                              |        |
| EDIP         | MV BMI-adjusted           | 1         | 1.13 (0.76,<br>1.69) | 0.83 (0.52,<br>1.30) | 1.11 (0.70,<br>1.76)         | 1.20 (0.73,<br>1.96)         | 0.558<br>8 | 1.11 (0.94,<br>1.32)         | 0.225  |
| EDIP         | MV DIAB-adjusted          | 1         | 1.19 (0.80,<br>1.78) | 0.90 (0.57,<br>1.43) | 1.27 (0.80,<br>2.02)         | 1.51 (0.92,<br>2.45)         | 0.126<br>4 | <b>1.22 (1.02,<br/>1.45)</b> | 0.0264 |
|              | <b>Cases/non cases</b>    | 48/9149   | 53/9144              | 66/9132              | 54/9143                      | 45/9152                      |            |                              |        |
| HEI-<br>2015 | MV BMI-adjusted           | 1         | 1.10 (0.74,<br>1.62) | 1.35 (0.92,<br>1.98) | 1.10 (0.74,<br>1.64)         | 0.97 (0.63,<br>1.48)         | 0.966<br>8 | 1.00 (0.88,<br>1.14)         | 0.9369 |
| HEI-<br>2015 | MV DIAB-adjusted          | 1         | 1.02 (0.69,<br>1.52) | 1.20 (0.82,<br>1.76) | 0.94 (0.63,<br>1.40)         | 0.76 (0.50,<br>1.17)         | 0.202<br>5 | 0.93 (0.82,<br>1.05)         | 0.2294 |
|              | <b>Non-endometrioid</b>   |           |                      |                      |                              |                              |            |                              |        |
|              | <b>Cases/non cases</b>    | 25/9181   | 39/9167              | 25/9181              | 21/9185                      | 27/9179                      |            |                              |        |

|          |                        |         |                   |                   |                   |                   |            |                   |        |
|----------|------------------------|---------|-------------------|-------------------|-------------------|-------------------|------------|-------------------|--------|
| EDIH     | MV BMI-adjusted        | 1       | 1.50 (0.90, 2.53) | 0.98 (0.54, 1.75) | 0.84 (0.45, 1.56) | 1.03 (0.56, 1.90) | 0.525<br>8 | 0.93 (0.78, 1.12) | 0.4568 |
| EDIH     | MV DIAB-adjusted       | 1       | 1.58 (0.94, 2.65) | 1.07 (0.60, 1.92) | 0.96 (0.52, 1.80) | 1.35 (0.74, 2.45) | 0.773<br>2 | 1.02 (0.85, 1.22) | 0.8641 |
|          | <b>Cases/non cases</b> | 27/9179 | 33/9173           | 26/9180           | 29/9177           | 22/9184           |            |                   |        |
| EDIP     | MV BMI-adjusted        | 1       | 1.17 (0.68, 2.04) | 0.95 (0.51, 1.76) | 1.07 (0.56, 2.05) | 0.85 (0.41, 1.75) | 0.629      | 0.94 (0.74, 1.20) | 0.6326 |
| EDIP     | MV DIAB-adjusted       | 1       | 1.22 (0.70, 2.11) | 1.02 (0.55, 1.90) | 1.20 (0.62, 2.29) | 1.03 (0.50, 2.12) | 0.947<br>3 | 1.01 (0.79, 1.29) | 0.9298 |
|          | <b>Cases/non cases</b> | 19/9187 | 31/9175           | 31/9175           | 27/9179           | 29/9177           |            |                   |        |
| HEI-2015 | MV BMI-adjusted        | 1       | 1.59 (0.90, 2.83) | 1.55 (0.87, 2.77) | 1.37 (0.75, 2.50) | 1.51 (0.83, 2.77) | 0.324<br>3 | 1.09 (0.91, 1.30) | 0.3529 |
| HEI-2015 | MV DIAB-adjusted       | 1       | 1.51 (0.85, 2.68) | 1.41 (0.79, 2.52) | 1.19 (0.65, 2.17) | 1.22 (0.67, 2.24) | 0.845<br>4 | 1.01 (0.85, 1.21) | 0.9071 |
|          | <b>Ovarian cancer</b>  |         |                   |                   |                   |                   |            |                   |        |
|          | <b>Cases/non cases</b> | 60/8963 | 52/8972           | 54/8970           | 41/8983           | 53/8970           |            |                   |        |
| EDIH     | MV BMI-adjusted        | 1       | 0.94 (0.64, 1.39) | 1.03 (0.70, 1.53) | 0.85 (0.55, 1.30) | 1.16 (0.76, 1.75) | 0.622<br>3 | 1.02 (0.90, 1.16) | 0.7549 |
| EDIH     | MV DIAB-adjusted       | 1       | 0.94 (0.64, 1.37) | 1.01 (0.68, 1.49) | 0.82 (0.53, 1.25) | 1.10 (0.73, 1.66) | 0.792<br>7 | 1.00 (0.88, 1.14) | 0.9391 |
|          | <b>Cases/non cases</b> | 64/8959 | 63/8961           | 44/8980           | 46/8978           | 43/8980           |            |                   |        |
| EDIP     | MV BMI-adjusted        | 1       | 1.02 (0.70, 1.49) | 0.76 (0.49, 1.18) | 0.85 (0.53, 1.35) | 0.88 (0.53, 1.46) | 0.435<br>2 | 1.00 (0.83, 1.19) | 0.9563 |
| EDIP     | MV DIAB-adjusted       | 1       | 1.02 (0.70, 1.50) | 0.75 (0.48, 1.16) | 0.84 (0.53, 1.34) | 0.87 (0.52, 1.43) | 0.394<br>5 | 0.98 (0.83, 1.17) | 0.8592 |
|          | <b>Cases/non cases</b> | 47/8976 | 45/8979           | 42/8982           | 69/8955           | 57/8966           |            |                   |        |
| HEI-2015 | MV BMI-adjusted        | 1       | 0.93 (0.62, 1.40) | 0.85 (0.56, 1.30) | 1.38 (0.94, 2.02) | 1.10 (0.73, 1.66) | 0.225<br>7 | 1.07 (0.94, 1.22) | 0.2929 |
| HEI-2015 | MV DIAB-adjusted       | 1       | 0.93 (0.62, 1.40) | 0.85 (0.56, 1.30) | 1.38 (0.94, 2.02) | 1.10 (0.74, 1.66) | 0.220<br>9 | 1.07 (0.94, 1.22) | 0.2874 |
|          | <b>Serous</b>          |         |                   |                   |                   |                   |            |                   |        |
|          | <b>Cases/non cases</b> | 27/9177 | 25/9180           | 23/9182           | 15/9190           | 24/9180           |            |                   |        |
| EDIH     | MV BMI-adjusted        | 1       | 1.06 (0.60, 1.86) | 1.07 (0.59, 1.93) | 0.76 (0.38, 1.49) | 1.29 (0.69, 2.40) | 0.658<br>7 | 1.10 (0.90, 1.33) | 0.344  |
| EDIH     | MV DIAB-adjusted       | 1       | 1.04 (0.60, 1.83) | 1.04 (0.58, 1.88) | 0.74 (0.38, 1.44) | 1.23 (0.67, 2.27) | 0.755<br>3 | 1.08 (0.89, 1.31) | 0.428  |
|          | <b>Cases/non cases</b> | 28/9176 | 35/9170           | 20/9185           | 10/9195           | 21/9183           |            |                   |        |
| EDIP     | MV BMI-adjusted        | 1       | 1.38 (0.80, 2.40) | 0.89 (0.46, 1.72) | 0.49 (0.21, 1.12) | 1.15 (0.54, 2.45) | 0.578<br>4 | 0.98 (0.75, 1.27) | 0.8558 |
| EDIP     | MV DIAB-adjusted       | 1       | 1.38 (0.80, 2.39) | 0.87 (0.45, 1.69) | 0.48 (0.21, 1.11) | 1.14 (0.54, 2.41) | 0.551      | 0.96 (0.74, 1.25) | 0.7837 |
|          | <b>Cases/non cases</b> | 23/9181 | 19/9186           | 21/9184           | 28/9177           | 23/9181           |            |                   |        |



|                    |                        |           |                   |                   |                   |                          |        |                          |        |
|--------------------|------------------------|-----------|-------------------|-------------------|-------------------|--------------------------|--------|--------------------------|--------|
| HEI-2015           | MV BMI-adjusted        | 1         | 0.80 (0.44, 1.48) | 0.86 (0.47, 1.56) | 1.12 (0.64, 2.00) | 0.89 (0.48, 1.65)        | 0.9317 | 0.97 (0.80, 1.18)        | 0.7414 |
| HEI-2015           | MV DIAB-adjusted       | 1         | 0.81 (0.44, 1.49) | 0.88 (0.48, 1.60) | 1.14 (0.65, 2.02) | 0.92 (0.50, 1.69)        | 0.8504 | 0.98 (0.81, 1.19)        | 0.8239 |
| <b>Non-Serous</b>  |                        |           |                   |                   |                   |                          |        |                          |        |
|                    | <b>Cases/non cases</b> | 33/9171   | 27/9177           | 31/9173           | 26/9178           | 29/9175                  |        |                          |        |
| EDIH               | MV BMI-adjusted        | 1         | 0.85 (0.51, 1.44) | 1.01 (0.60, 1.69) | 0.91 (0.52, 1.58) | 1.07 (0.61, 1.88)        | 0.7619 | 0.96 (0.80, 1.15)        | 0.6449 |
| EDIH               | MV DIAB-adjusted       | 1         | 0.85 (0.50, 1.43) | 0.98 (0.58, 1.64) | 0.87 (0.50, 1.51) | 1.01 (0.58, 1.76)        | 0.9384 | 0.94 (0.79, 1.12)        | 0.5038 |
|                    | <b>Cases/non cases</b> | 36/9168   | 28/9176           | 24/9180           | 36/9168           | 22/9182                  |        |                          |        |
| EDIP               | MV BMI-adjusted        | 1         | 0.75 (0.44, 1.28) | 0.66 (0.36, 1.18) | 1.03 (0.58, 1.85) | 0.69 (0.35, 1.37)        | 0.5354 | 1.01 (0.80, 1.28)        | 0.924  |
| EDIP               | MV DIAB-adjusted       | 1         | 0.76 (0.45, 1.29) | 0.65 (0.36, 1.17) | 1.02 (0.57, 1.83) | 0.68 (0.34, 1.33)        | 0.4836 | 1.00 (0.79, 1.26)        | 0.9999 |
|                    | <b>Cases/non cases</b> | 23/9181   | 27/9177           | 21/9183           | 41/9163           | 34/9170                  |        |                          |        |
| HEI-2015           | MV BMI-adjusted        | 1         | 1.15 (0.66, 2.00) | 0.88 (0.48, 1.60) | 1.68 (0.99, 2.86) | 1.36 (0.78, 2.37)        | 0.1158 | <b>1.17 (0.98, 1.39)</b> | 0.086  |
| HEI-2015           | MV DIAB-adjusted       | 1         | 1.14 (0.65, 1.99) | 0.87 (0.48, 1.58) | 1.66 (0.98, 2.82) | 1.32 (0.76, 2.31)        | 0.1333 | <b>1.16 (0.97, 1.38)</b> | 0.0993 |
| <b>Lung cancer</b> |                        |           |                   |                   |                   |                          |        |                          |        |
|                    | <b>Cases/non cases</b> | 482/20722 | 408/20797         | 410/20795         | 417/20788         | 399/20805                |        |                          |        |
| EDIH               | MV BMI-adjusted        | 1         | 0.94 (0.82, 1.08) | 0.98 (0.85, 1.12) | 1.03 (0.89, 1.18) | 0.92 (0.79, 1.06)        | 0.4724 | 0.96 (0.92, 1.01)        | 0.1257 |
| EDIH               | MV DIAB-adjusted       | 1         | 0.96 (0.84, 1.10) | 0.99 (0.86, 1.14) | 1.03 (0.89, 1.19) | <b>0.86 (0.74, 1.00)</b> | 0.1208 | 0.94 (0.90, 0.99)        | 0.0128 |
|                    | <b>Cases/non cases</b> | 547/20657 | 464/20741         | 397/20808         | 377/20828         | 331/20873                |        |                          |        |
| EDIP               | MV BMI-adjusted        | 1         | 1.05 (0.92, 1.21) | 0.98 (0.85, 1.14) | 1.05 (0.89, 1.23) | 1.04 (0.87, 1.25)        | 0.6951 | 0.98 (0.92, 1.04)        | 0.4603 |
| EDIP               | MV DIAB-adjusted       | 1         | 1.06 (0.92, 1.21) | 0.99 (0.85, 1.15) | 1.05 (0.89, 1.23) | 0.96 (0.80, 1.14)        | 0.6906 | 0.96 (0.90, 1.02)        | 0.1411 |
|                    | <b>Cases/non cases</b> | 520/20684 | 439/20765         | 415/20789         | 387/20817         | 354/20850                |        |                          |        |
| HEI-2015           | MV BMI-adjusted        | 1         | 0.97 (0.85, 1.10) | 0.99 (0.86, 1.13) | 0.96 (0.83, 1.10) | 0.89 (0.77, 1.03)        | 0.1678 | <b>0.95 (0.91, 1.00)</b> | 0.0293 |
| HEI-2015           | MV DIAB-adjusted       | 1         | 1.02 (0.89, 1.15) | 1.05 (0.92, 1.20) | 1.04 (0.91, 1.20) | 1.01 (0.87, 1.17)        | 0.7406 | 0.99 (0.95, 1.04)        | 0.6553 |
| <b>Small cell</b>  |                        |           |                   |                   |                   |                          |        |                          |        |
|                    | <b>Cases/non cases</b> | 25/21248  | 32/21242          | 26/21248          | 29/21245          | 26/21247                 |        |                          |        |
| EDIH               | MV BMI-adjusted        | 1         | 1.42 (0.82, 2.43) | 1.02 (0.57, 1.82) | 1.13 (0.63, 2.01) | 0.78 (0.42, 1.43)        | 0.2686 | 0.98 (0.83, 1.17)        | 0.8577 |
| EDIH               | MV DIAB-adjusted       | 1         | 1.46 (0.85, 2.50) | 1.08 (0.60, 1.91) | 1.19 (0.67, 2.12) | 0.78 (0.42, 1.42)        | 0.2568 | 0.97 (0.83, 1.15)        | 0.7486 |
|                    | <b>Cases/non cases</b> | 31/21242  | 38/21236          | 23/21251          | 28/21246          | 18/21255                 |        |                          |        |

|          |                        |           |                   |                   |                   |                          |         |                          |        |
|----------|------------------------|-----------|-------------------|-------------------|-------------------|--------------------------|---------|--------------------------|--------|
| EDIP     | MV BMI-adjusted        | 1         | 1.54 (0.92, 2.60) | 0.92 (0.49, 1.70) | 1.26 (0.67, 2.38) | 0.81 (0.38, 1.69)        | 0.567 3 | 0.99 (0.79, 1.25)        | 0.9444 |
| EDIP     | MV DIAB-adjusted       | 1         | 1.55 (0.92, 2.61) | 0.98 (0.53, 1.81) | 1.32 (0.70, 2.48) | 0.78 (0.37, 1.63)        | 0.539 1 | 0.98 (0.78, 1.23)        | 0.8707 |
|          | <b>Cases/non cases</b> | 33/21240  | 27/21246          | 32/21241          | 23/21250          | 23/21250                 |         |                          |        |
| HEI-2015 | MV BMI-adjusted        | 1         | 1.22 (0.72, 2.04) | 1.81 (1.09, 3.01) | 1.52 (0.87, 2.69) | <b>1.82 (1.01, 3.28)</b> | 0.024 1 | <b>1.25 (1.04, 1.50)</b> | 0.0162 |
| HEI-2015 | MV DIAB-adjusted       | 1         | 1.25 (0.75, 2.09) | 1.93 (1.16, 3.19) | 1.66 (0.94, 2.91) | <b>2.06 (1.15, 3.69)</b> | 0.006 5 | <b>1.29 (1.08, 1.54)</b> | 0.0053 |
|          | <b>Non small cell</b>  |           |                   |                   |                   |                          |         |                          |        |
|          | <b>Cases/non cases</b> | 249/20988 | 183/21055         | 204/21033         | 225/21013         | 198/21039                |         |                          |        |
| EDIH     | MV BMI-adjusted        | 1         | 0.82 (0.67, 1.00) | 0.95 (0.78, 1.16) | 1.09 (0.89, 1.32) | 0.93 (0.75, 1.14)        | 0.873 9 | 0.97 (0.91, 1.03)        | 0.3285 |
| EDIH     | MV DIAB-adjusted       | 1         | 0.83 (0.68, 1.01) | 0.96 (0.79, 1.17) | 1.10 (0.90, 1.33) | 0.88 (0.71, 1.08)        | 0.713 9 | 0.95 (0.89, 1.01)        | 0.1220 |
|          | <b>Cases/non cases</b> | 275/20962 | 218/21020         | 205/21032         | 192/21046         | 169/21068                |         |                          |        |
| EDIP     | MV BMI-adjusted        | 1         | 0.97 (0.81, 1.19) | 1.01 (0.82, 1.25) | 1.07 (0.85, 1.34) | 1.08 (0.84, 1.39)        | 0.455 6 | 1.00 (0.92, 1.09)        | 0.9498 |
| EDIP     | MV DIAB-adjusted       | 1         | 0.98 (0.81, 1.19) | 1.01 (0.82, 1.25) | 1.06 (0.84, 1.33) | 0.98 (0.77, 1.26)        | 0.890 8 | 0.97 (0.89, 1.06)        | 0.5158 |
|          | <b>Cases/non cases</b> | 251/20985 | 219/21018         | 207/21030         | 197/21040         | 184/21053                |         |                          |        |
| HEI-2015 | MV BMI-adjusted        | 1         | 0.97 (0.81, 1.17) | 0.96 (0.80, 1.17) | 0.94 (0.77, 1.14) | 0.88 (0.72, 1.08)        | 0.236 6 | 0.94 (0.89, 1.01)        | 0.0895 |
| HEI-2015 | MV DIAB-adjusted       | 1         | 1.01 (0.84, 1.21) | 1.02 (0.84, 1.23) | 1.01 (0.83, 1.23) | 0.98 (0.80, 1.20)        | 0.912 6 | 0.98 (0.92, 1.05)        | 0.5628 |

a.Values presented are hazard ratios (HR) and 95% confidence intervals (95% CI). HRs were derived from multivariable BMI-adjusted or multivariable DIAB-adjusted Cox proportional hazards regression models adjusted for body mass index and baseline diabetes, respectively, then further adjusted for the following baseline covariates: age at enrollment, physical activity, race and ethnicity, educational level, family history of cancer, number of hormones used, comorbidity score, baseline cardiovascular disease status, baseline lung disease (we excluded baseline lung disease cases in lung cancer analyses), number of supplements used, non-steroidal anti-inflammatory drug use, hormone therapy study arm (Not randomized to HRT, E-alone intervention, E-alone control, E+P intervention, E+P control), baseline hormone therapy ever, oral contraceptive duration, pack-years of smoking, coffee/tea, and total alcohol intake. Colorectal cancer and subtype analyses were additionally adjusted for colorectal cancer screening. Invasive breast cancer and subtype analyses were additionally adjusted for hysterectomy age, months of breast-feeding, age at menopause, mammogram ever, parity, bilateral oophorectomy, passive smoking, Gail 5-year risk score. Endometrial cancer and ovarian cancer analyses were additionally adjusted for age at first birth, age at menarche, age at menopause, months of breast-feeding, and parity. Ovarian cancer analyses were further adjusted for tubal ligation. Lung cancer analyses were additionally adjusted for smoking status (current, former, never smokers) and passive smoking.

b.Cancer sites were defined as follows: total cancer was the first occurrence of any cancer except non-melanoma skin cancer. Proximal colon - cecum, ascending colon, hepatic flexure of colon, transverse colon (ICD site codes 18.0,18.2,18.3, 18.4); distal colon - splenic flexure of colon, descending colon, sigmoid colon (ICD site codes 18.5, 18.6,18.7); Luminal A breast cancer - ER+ and/or PR+ , HER2-; luminal B breast cancer - ER+ and/or PR+ , HER2+; type I endometrial cancer - Adenocarcinoma NOS, endometrioid carcinoma (SEER ICD histology codes 8140/3,8380/3); type II endometrial cancer - cases other than type I endometrial cancer cases; serous ovarian cancer - Undifferentiated carcinoma, NOS, anaplastic carcinoma, NOS, pleomorphic carcinoma, papillary carcinoma NOS, transitional cell carcinoma NOS, papillary transitional cell carcinoma, non-invasive, papillary transitional cell carcinoma, papillary adenocarcinoma, NOS, serous cystadenocarcinoma/borderline, serous cystadenocarcinoma, NOS, serous cystadenoma, borderline malignancy, serous cystadenoma borderline malignancy, papillary cystadenocarcinoma NOS, papillary cystadenocarcinoma serous, serous surface papillary carcinoma, serous papillary cystic tumor of borderline malignancy, papillary cystadenoma serous, borderline malignancy,serous adenocarcinofibroma (SEER ICD histology codes 8020/3, 8021/3, 8022/3, 8050/3, 8120/3, 8130/2, 8130/3, 8260/3, 8441/1, 8441/3, 8442/1, 8442/3, 8450/3, 8460/3, 8461/3, 8462/1, 9014/3); non-serous ovarian cancer - Endometrioid carcinoma, endometrioid adenofibroma, malignant, endometrioid adenocarcinoma, secretory variant, endometrioid adenocarcinoma, ciliated cell variant, clear cell adenocarcinoma, NOS, Mucinous cystadenocarcinoma, NOS, mucinous cystadenocarcinoma, papillary, mucinous cystadenoma borderline malignancy, mucous adenocarcinoma, mullerian mixed tumor, mixed cell adenocarcinoma, brenner tumour borderline malignancy, brenner tumor malignant (SEER ICD histology code 8380/3, 8381/3, 8382/3, 383/3,8310/3,8470/3,8471/3,8472/1,8480/3,8950/3,8323/3,9000/1,9000/3; small-cell lung cancer - Small cell carcinoma NOS, oat cell carcinoma, small cell carcinoma fusiform cell, small cell carcinoma intermediate cell, small cell-large cell carcinoma (SEER ICD histology code 8041/3, 8042/3,8043/3,8044/3, 8045/3); non-small cell lung cancer - Non-small cell carcinoma, squamous cell carcinoma nos,

adenocarcinoma NOS, bronchiolo-alveolar adenocarcinoma, large cell carcinoma NOS, adenosquamous carcinoma, carcinoid tumour, NOS (except appendix m-8240/1), mesothelioma malignant (SEER ICD histology code 8046/3, 8070/3, 8140/3, 8250/3, 8012/3, 8560/3, 8240/3, 9050/3).

c.The p value for linear trend was estimated in the same multivariable-adjusted models by assigning the quintile-specific median value of each dietary pattern to all participants in the quintile and modelling as an ordinal variable.

d.Dietary score was input in the corresponding multivariable BMI adjusted or multivariable DIAB adjusted models as a continuous variable.

**Supplementary Table S6. Multivariable-adjusted associations of dietary patterns with specific cancers in body mass index (kg/m<sup>2</sup>) subgroups<sup>a,b</sup>**

| Dietary pattern%/<br>cancer site                          | 1-SD increment in<br>dietary score | P-value | 1-SD increment in<br>dietary score | P-value       | 1-SD increment in<br>dietary score | P-value | P interaction <sup>d</sup> |
|-----------------------------------------------------------|------------------------------------|---------|------------------------------------|---------------|------------------------------------|---------|----------------------------|
|                                                           | Normal weight (18.5-24.9)          |         | Overweight (25-29.9)               |               | Obese (>30)                        |         |                            |
| <b>Total cancer<br/>(except non-melanoma skin cancer)</b> |                                    |         |                                    |               |                                    |         |                            |
| EDIH                                                      | <b>1.04 (1.01, 1.06)</b>           | 0.0141  | 1.00 (0.98, 1.03)                  | 0.7771        | 1.01 (0.98, 1.04)                  | 0.4243  | 0.5376                     |
| EDIP                                                      | <b>1.03 (0.99, 1.07)</b>           | 0.0993  | <b>1.03 (0.99, 1.07)</b>           | 0.1032        | <b>1.03 (0.99, 1.07)</b>           | 0.1019  | <b>0.0033</b>              |
| HEI2015                                                   | <b>0.97 (0.95, 1.00)</b>           | 0.0234  | <b>0.97 (0.95, 1.00)</b>           | 0.0433        | 0.98 (0.96, 1.01)                  | 0.2341  | 0.3741                     |
| <b>Colorectal cancer</b>                                  |                                    |         |                                    |               |                                    |         |                            |
| EDIH                                                      | 1.02 (0.92, 1.14)                  | 0.6567  | <b>1.09 (0.98, 1.20)</b>           | 0.1015        | <b>1.07 (0.98, 1.17)</b>           | 0.1507  | 0.7988                     |
| EDIP                                                      | 1.07 (0.94, 1.22)                  | 0.3342  | <b>1.10 (0.98, 1.27)</b>           | 0.1126        | 1.04 (0.91, 1.18)                  | 0.5656  | 0.9436                     |
| HEI2015                                                   | <b>0.89 (0.81, 0.98)</b>           | 0.0127  | 0.93 (0.85, 1.03)                  | 0.1538        | 1.00 (0.91, 1.10)                  | 0.9321  | <b>0.0296</b>              |
| <b>Colon Cancer</b>                                       |                                    |         |                                    |               |                                    |         |                            |
| EDIH                                                      | 1.02 (0.91, 1.14)                  | 0.7788  | <b>1.12 (1.00, 1.24)</b>           | 0.0499        | <b>1.09 (0.98, 1.20)</b>           | 0.1049  | 0.7943                     |
| EDIP                                                      | 1.07 (0.93, 1.23)                  | 0.3236  | <b>1.14 (0.99, 1.32)</b>           | 0.0921        | 1.06 (0.92, 1.22)                  | 0.4031  | 0.9748                     |
| HEI2015                                                   | 0.91 (0.82, 1.00)                  | 0.0581  | 0.92 (0.83, 1.02)                  | 0.0992        | 0.98 (0.89, 1.09)                  | 0.7496  | 0.1153                     |
| <b>Proximal colon cancer</b>                              |                                    |         |                                    |               |                                    |         |                            |
| EDIH                                                      | 1.10 (0.95, 1.27)                  | 0.2195  | <b>1.14 (0.99, 1.31)</b>           | 0.0728        | <b>1.10 (0.97, 1.25)</b>           | 0.1262  | 0.7014                     |
| EDIP                                                      | 1.06 (0.88, 1.28)                  | 0.5074  | 1.11 (0.92, 1.33)                  | 0.2892        | 1.08 (0.90, 1.29)                  | 0.4238  | 0.8933                     |
| HEI2015                                                   | 0.90 (0.79, 1.02)                  | 0.102   | 0.96 (0.84, 1.10)                  | 0.6072        | 0.96 (0.84, 1.09)                  | 0.5072  | 0.4318                     |
| <b>Distal colon and rectal cancer</b>                     |                                    |         |                                    |               |                                    |         |                            |
| EDIH                                                      | 1.06 (0.89, 1.26)                  | 0.5374  | 0.99 (0.84, 1.17)                  | 0.9022        | 1.05 (0.90, 1.22)                  | 0.5485  | 0.7693                     |
| EDIP                                                      | 1.09 (0.87, 1.36)                  | 0.4542  | 1.06 (0.86, 1.32)                  | 0.5753        | 1.10 (0.90, 1.36)                  | 0.3438  | 0.5558                     |
| HEI2015                                                   | 0.97 (0.83, 1.14)                  | 0.7116  | 0.90 (0.78, 1.04)                  | 0.1646        | 0.98 (0.83, 1.14)                  | 0.7579  | 0.3594                     |
| <b>Intestinal polyps</b>                                  |                                    |         |                                    |               |                                    |         |                            |
| EDIH                                                      | <b>1.09 (1.05, 1.13)</b>           | <.0001  | 1.03 (0.99, 1.07)                  | 0.1225        | <b>1.06 (1.02, 1.10)</b>           | 0.0012  | 0.2815                     |
| EDIP                                                      | 1.04 (0.99, 1.10)                  | 0.1383  | <b>1.04 (0.99, 1.10)</b>           | 0.0832        | <b>1.05 (1.00, 1.10)</b>           | 0.0574  | 0.7083                     |
| HEI2015                                                   | <b>0.93 (0.89, 0.96)</b>           | <.0001  | <b>0.95 (0.91, 0.98)</b>           | <b>0.0025</b> | <b>0.96 (0.93, 1.00)</b>           | 0.0647  | <b>0.0238</b>              |
| <b>Invasive breast cancer</b>                             |                                    |         |                                    |               |                                    |         |                            |
| EDIH                                                      | <b>1.10 (1.03, 1.16)</b>           | 0.0025  | 1.00 (0.95, 1.06)                  | 0.9491        | 1.01 (0.95, 1.06)                  | 0.7766  | 0.8284                     |
| EDIP                                                      | <b>1.05 (0.98, 1.14)</b>           | 0.1767  | 1.00 (0.93, 1.08)                  | 0.9395        | 1.06 (0.98, 1.14)                  | 0.1426  | 0.0617                     |
| HEI2015                                                   | 1.03 (0.98, 1.09)                  | 0.2467  | 0.98 (0.92, 1.03)                  | 0.3785        | 1.00 (0.94, 1.05)                  | 0.8552  | 0.4120                     |
| <b>ER+</b>                                                |                                    |         |                                    |               |                                    |         |                            |

|                        |                          |               |                   |        |                          |        |               |
|------------------------|--------------------------|---------------|-------------------|--------|--------------------------|--------|---------------|
| EDIH                   | <b>1.08 (1.01, 1.16)</b> | 0.0181        | 0.98 (0.92, 1.05) | 0.5898 | 1.00 (0.94, 1.06)        | 0.8793 | 0.6604        |
| EDIP                   | 1.05 (0.96, 1.14)        | 0.2976        | 1.00 (0.92, 1.09) | 0.9347 | 1.00 (0.92, 1.09)        | 0.9481 | 0.5558        |
| HEI2015                | 1.04 (0.98, 1.11)        | 0.2145        | 0.99 (0.93, 1.06) | 0.8108 | 1.02 (0.96, 1.09)        | 0.5236 | 0.6819        |
| <b>ER-</b>             |                          |               |                   |        |                          |        |               |
| EDIH                   | <b>1.23 (1.06, 1.44)</b> | 0.0076        | 1.06 (0.90, 1.24) | 0.5151 | 1.06 (0.90, 1.26)        | 0.4533 | 0.6864        |
| EDIP                   | 1.16 (0.95, 1.43)        | 0.1427        | 0.94 (0.76, 1.17) | 0.5998 | <b>1.26 (1.01, 1.58)</b> | 0.0385 | <b>0.0101</b> |
| HEI2015                | 1.03 (0.89, 1.19)        | 0.704         | 0.92 (0.79, 1.07) | 0.2842 | 0.91 (0.77, 1.09)        | 0.3104 | 0.1146        |
| <b>PR+</b>             |                          |               |                   |        |                          |        |               |
| EDIH                   | <b>1.09 (1.02, 1.18)</b> | 0.0126        | 1.00 (0.93, 1.07) | 0.9161 | 0.99 (0.93, 1.06)        | 0.8215 | 0.3277        |
| EDIP                   | 1.05 (0.96, 1.15)        | 0.2868        | 1.02 (0.93, 1.12) | 0.6592 | 0.99 (0.90, 1.08)        | 0.7517 | 0.8963        |
| HEI2015                | 1.02 (0.95, 1.09)        | 0.5582        | 0.99 (0.93, 1.06) | 0.8494 | 1.03 (0.96, 1.10)        | 0.3961 | 0.7424        |
| <b>PR-</b>             |                          |               |                   |        |                          |        |               |
| EDIH                   | <b>1.13 (1.00, 1.26)</b> | 0.0404        | 0.99 (0.88, 1.11) | 0.8224 | 1.05 (0.93, 1.18)        | 0.4551 | 0.1652        |
| EDIP                   | 1.11 (0.95, 1.28)        | 0.1796        | 0.92 (0.79, 1.07) | 0.2673 | <b>1.17 (1.00, 1.38)</b> | 0.0566 | <b>0.0052</b> |
| HEI2015                | 1.07 (0.96, 1.19)        | 0.2306        | 0.96 (0.85, 1.07) | 0.4301 | 0.93 (0.82, 1.05)        | 0.2337 | <b>0.0280</b> |
| <b>HER2+</b>           |                          |               |                   |        |                          |        |               |
| EDIH                   | 1.10 (0.92, 1.32)        | 0.3002        | 0.98 (0.82, 1.18) | 0.8322 | 1.13 (0.96, 1.34)        | 0.1458 | 0.2537        |
| EDIP                   | 1.16 (0.91, 1.46)        | 0.2316        | 0.96 (0.76, 1.22) | 0.7675 | 1.10 (0.86, 1.39)        | 0.4591 | 0.0995        |
| HEI2015                | 1.02 (0.86, 1.21)        | 0.8531        | 1.03 (0.86, 1.22) | 0.7729 | 0.91 (0.76, 1.10)        | 0.3384 | 0.5922        |
| <b>HER2-</b>           |                          |               |                   |        |                          |        |               |
| EDIH                   | <b>1.11 (1.04, 1.19)</b> | <b>0.0024</b> | 0.99 (0.93, 1.06) | 0.8484 | 0.99 (0.92, 1.05)        | 0.6722 | 0.5530        |
| EDIP                   | 1.05 (0.96, 1.14)        | 0.2926        | 0.99 (0.91, 1.08) | 0.7593 | 1.05 (0.96, 1.15)        | 0.2494 | 0.1834        |
| HEI2015                | 1.03 (0.97, 1.10)        | 0.3145        | 0.98 (0.92, 1.05) | 0.6213 | 1.00 (0.94, 1.07)        | 0.8942 | 0.3331        |
| <b>Luminal A</b>       |                          |               |                   |        |                          |        |               |
| EDIH                   | <b>1.08 (1.01, 1.17)</b> | <b>0.0263</b> | 0.99 (0.92, 1.06) | 0.6882 | 0.97 (0.91, 1.04)        | 0.4137 | 0.5215        |
| EDIP                   | 1.03 (0.94, 1.13)        | 0.517         | 1.00 (0.91, 1.09) | 0.9643 | 1.03 (0.94, 1.12)        | 0.5779 | 0.4386        |
| HEI2015                | 1.02 (0.96, 1.10)        | 0.4717        | 0.98 (0.92, 1.05) | 0.6428 | 1.02 (0.95, 1.09)        | 0.6283 | 0.5947        |
| <b>Luminal B</b>       |                          |               |                   |        |                          |        |               |
| EDIH                   | 1.10 (0.89, 1.36)        | 0.3834        | 0.99 (0.80, 1.24) | 0.9444 | <b>1.20 (0.99, 1.46)</b> | 0.0586 | 0.1474        |
| EDIP                   | 1.16 (0.88, 1.53)        | 0.2815        | 0.96 (0.72, 1.27) | 0.7526 | 1.07 (0.80, 1.42)        | 0.6469 | 0.1114        |
| HEI2015                | 1.06 (0.86, 1.31)        | 0.5762        | 1.08 (0.88, 1.34) | 0.4687 | 0.94 (0.76, 1.16)        | 0.5591 | 0.7103        |
| <b>Triple negative</b> |                          |               |                   |        |                          |        |               |
| EDIH                   | <b>1.30 (1.08, 1.57)</b> | 0.0061        | 1.06 (0.86, 1.30) | 0.6015 | 1.15 (0.94, 1.41)        | 0.1815 | 0.7083        |
| EDIP                   | 1.18 (0.91, 1.52)        | 0.2086        | 0.87 (0.67, 1.13) | 0.2986 | <b>1.35 (1.02, 1.79)</b> | 0.0346 | <b>0.0305</b> |
| HEI2015                | 1.06 (0.88, 1.28)        | 0.511         | 0.98 (0.81, 1.19) | 0.8682 | 0.86 (0.69, 1.08)        | 0.1969 | 0.1262        |

**Invasive ductal carcinoma**

|                                          |                          |        |                                           |        |                          |        |               |
|------------------------------------------|--------------------------|--------|-------------------------------------------|--------|--------------------------|--------|---------------|
| EDIH                                     | <b>1.08 (0.99, 1.17)</b> | 0.0727 | 1.03 (0.96, 1.12)                         | 0.4126 | 1.02 (0.95, 1.10)        | 0.5894 | 0.7604        |
| EDIP                                     | 1.00 (0.90, 1.12)        | 0.9379 | 1.03 (0.93, 1.14)                         | 0.5948 | <b>1.08 (0.97, 1.19)</b> | 0.1577 | <b>0.0514</b> |
| HEI2015                                  | <b>1.07 (0.99, 1.15)</b> | 0.0932 | 0.96 (0.89, 1.04)                         | 0.294  | <b>1.05 (0.97, 1.14)</b> | 0.2301 | 0.8516        |
| <b><i>Invasive lobular carcinoma</i></b> |                          |        |                                           |        |                          |        |               |
| EDIH                                     | <b>1.32 (1.09, 1.58)</b> | 0.004  | 1.15 (0.96, 1.37)                         | 0.1194 | 0.86 (0.70, 1.06)        | 0.1726 | 0.2609        |
| EDIP                                     | <b>1.28 (1.00, 1.64)</b> | 0.0484 | 0.88 (0.69, 1.11)                         | 0.2806 | 0.86 (0.65, 1.12)        | 0.2594 | 0.7579        |
| HEI2015                                  | 1.00 (0.83, 1.21)        | 0.9953 | 1.05 (0.87, 1.26)                         | 0.5986 | 1.05 (0.85, 1.30)        | 0.6237 | 1.0000        |
| <b><i>Localized</i></b>                  |                          |        |                                           |        |                          |        |               |
| EDIH                                     | <b>1.12 (1.04, 1.20)</b> | 0.0017 | 1.01 (0.94, 1.08)                         | 0.772  | 1.02 (0.96, 1.09)        | 0.5312 | 0.8848        |
| EDIP                                     | <b>1.09 (1.00, 1.20)</b> | 0.0524 | 1.02 (0.94, 1.12)                         | 0.6195 | 1.01 (0.92, 1.11)        | 0.8287 | 0.4535        |
| HEI2015                                  | 1.04 (0.98, 1.12)        | 0.1957 | 0.99 (0.92, 1.06)                         | 0.7331 | 1.01 (0.94, 1.08)        | 0.7502 | 0.3566        |
| <b><i>Regional/distant</i></b>           |                          |        |                                           |        |                          |        |               |
| EDIH                                     | 0.99 (0.87, 1.12)        | 0.8224 | 1.02 (0.91, 1.15)                         | 0.7087 | 0.96 (0.86, 1.07)        | 0.4631 | 0.8065        |
| EDIP                                     | 0.93 (0.80, 1.09)        | 0.3714 | 0.99 (0.85, 1.15)                         | 0.8577 | 1.11 (0.96, 1.28)        | 0.1651 | 0.1034        |
| HEI2015                                  | 1.04 (0.93, 1.17)        | 0.4515 | 0.96 (0.86, 1.08)                         | 0.5157 | 0.97 (0.87, 1.09)        | 0.6451 | 0.7506        |
| <b><i>Endometrial cancer</i></b>         |                          |        |                                           |        |                          |        |               |
|                                          |                          |        | <i>Overweight/Obese (≥25)<sup>e</sup></i> |        |                          |        |               |
| EDIH                                     | <b>1.34 (1.04, 1.72)</b> | 0.0244 | 1.02 (0.91, 1.15)                         | 0.6696 | NA <sup>f</sup>          | NA     | <b>0.0020</b> |
| EDIP                                     | 1.23 (0.87, 1.74)        | 0.2358 | 1.08 (0.92, 1.26)                         | 0.3498 | NA                       | NA     | <b>0.0956</b> |
| HEI2015                                  | 0.94 (0.74, 1.20)        | 0.6108 | 1.01 (0.90, 1.13)                         | 0.8869 | NA                       | NA     | <b>0.0338</b> |
| <b><i>Endometrioid</i></b>               |                          |        |                                           |        |                          |        |               |
|                                          |                          |        | <i>Overweight/Obese (≥25)</i>             |        |                          |        |               |
| EDIH                                     | 1.20 (0.86, 1.66)        | 0.2814 | 1.09 (0.95, 1.25)                         | 0.211  | NA                       | NA     | <b>0.0395</b> |
| EDIP                                     | 1.04 (0.68, 1.60)        | 0.8614 | <b>1.18 (0.98, 1.42)</b>                  | 0.0854 | NA                       | NA     | 0.4953        |
| HEI2015                                  | 1.18 (0.86, 1.61)        | 0.3112 | 0.94 (0.82, 1.08)                         | 0.386  | NA                       | NA     | 0.5038        |
| <b><i>Ovarian cancer</i></b>             |                          |        |                                           |        |                          |        |               |
| EDIH                                     | 0.99 (0.77, 1.27)        | 0.9304 | 1.10 (0.89, 1.39)                         | 0.3632 | 0.98 (0.79, 1.22)        | 0.8754 | 0.4190        |
| EDIP                                     | 0.98 (0.71, 1.35)        | 0.901  | 1.26 (0.92, 1.71)                         | 0.1442 | 0.83 (0.62, 1.12)        | 0.223  | 0.3852        |
| HEI2015                                  | 0.98 (0.78, 1.23)        | 0.859  | 1.08 (0.87, 1.35)                         | 0.4856 | 1.21 (0.96, 1.53)        | 0.1134 | <b>0.0637</b> |
| <b><i>Lung cancer</i></b>                |                          |        |                                           |        |                          |        |               |
| EDIH                                     | 0.96 (0.89, 1.03)        | 0.2553 | 0.98 (0.91, 1.06)                         | 0.6904 | 0.96 (0.88, 1.06)        | 0.4127 | 0.3580        |
| EDIP                                     | 0.97 (0.88, 1.07)        | 0.5618 | 0.98 (0.89, 1.09)                         | 0.7086 | 0.99 (0.87, 1.12)        | 0.8926 | 0.3055        |
| HEI2015                                  | 0.92 (0.86, 0.99)        | 0.0317 | 0.95 (0.87, 1.02)                         | 0.1699 | 0.99 (0.90, 1.09)        | 0.9009 | 0.1649        |
| <b><i>Small cell</i></b>                 |                          |        |                                           |        |                          |        |               |
| EDIH                                     | 1.02 (0.76, 1.37)        | 0.8838 | 0.78 (0.58, 1.06)                         | 0.1082 | 1.07 (0.80, 1.42)        | 0.6499 | 0.4219        |
| EDIP                                     | 0.98 (0.64, 1.50)        | 0.9426 | 0.79 (0.54, 1.16)                         | 0.2368 | 1.18 (0.79, 1.76)        | 0.4215 | 0.1424        |
| HEI2015                                  | 1.11 (0.80, 1.54)        | 0.5449 | 1.39 (1.02, 1.90)                         | 0.0368 | 1.26 (0.92, 1.74)        | 0.1543 | <b>0.0634</b> |

a. HRs were derived from multivariable-adjusted Cox proportional hazards regression models adjusted for the following baseline covariates: age at enrollment, physical activity, race and ethnicity, educational level, family history of cancer, number of hormones used, comorbidity score, baseline cardiovascular disease status, baseline lung disease, number of supplements used, non-steroidal anti-inflammatory drug use, hormone therapy study arm (Not randomized to HRT, E-alone intervention, E-alone control, E+P intervention, E+P control), baseline hormone therapy ever, oral contraceptive duration, pack-years of smoking, coffee/tea, and total alcohol intake. Colorectal cancer and subtype analyses were additionally adjusted for colorectal cancer screening. Invasive breast cancer and subtype analyses were additionally adjusted for hysterectomy age, months of breast-feeding, age at menopause, mammogram ever, parity, bilateral oophorectomy, passive smoking, Gail 5-year risk score. Endometrial cancer and ovarian cancer analyses were additionally adjusted for age at first birth, age at menarche, age at menopause, months of breast-feeding, and parity. Ovarian cancer analyses were further adjusted for tubal ligation. Lung cancer analyses were additionally adjusted for smoking status (current, former, never smokers) and passive smoking. Dietary score was input in each model as a continuous variable.

b. We presented here the cancer sites that were found to be associated with dietary patterns in the main analysis. Cancer sites were defined as follows: total cancer was the first occurrence of any cancer except non-melanoma skin cancer. Proximal colon - cecum, ascending colon, hepatic flexure of colon, transverse colon (ICD site codes 18.0,18.2,18.3, 18.4); distal colon - splenic flexure of colon, descending colon, sigmoid colon (ICD site codes 18.5, 18.6,18.7); Luminal A breast cancer - ER+ and/or PR+ , HER2-; luminal B breast cancer - ER+ and/or PR+ , HER2+; type 1 endometrial cancer - Adenocarcinoma NOS, endometrioid carcinoma (SEER ICD histology codes 8140/3,8380/3); type II endometrial cancer - cases other than type I endometrial cancer cases; serous ovarian cancer - Undifferentiated carcinoma, NOS, anaplastic carcinoma, NOS, pleomorphic carcinoma, papillary carcinoma NOS, transitional cell carcinoma NOS, papillary transitional cell carcinoma, non-invasive, papillary transitional cell carcinoma, papillary adenocarcinoma, NOS, serous cystadenocarcinoma/borderline, serous cystadenocarcinoma, NOS, serous cystadenoma, borderline malignancy, serous cystadenoma borderline malignancy, papillary cystadenocarcinoma NOS, papillary cystadenocarcinoma serous, serous surface papillary carcinoma, serous papillary cystic tumor of borderline malignancy, papillary cystadenoma serous, borderline malignancy,serous adenocarcinofibroma (SEER ICD histology codes 8020/3, 8021/3, 8022/3, 8050/3, 8120/3, 8130/2, 8130/3, 8260/3, 8441/1, 8441/3, 8442/1, 8442/3, 8450/3, 8460/3, 8461/3, 8462/1, 9014/3); non-serous ovarian cancer - Endometrioid carcinoma, endometrioid adenofibroma, malignant, endometrioid adenocarcinoma, secretory variant, endometrioid adenocarcinoma, ciliated cell variant, clear cell adenocarcinoma, NOS, Mucinous cystadenocarcinoma, NOS, mucinous cystadenocarcinoma, papillary, mucinous cystadenoma borderline malignancy, mucous adenocarcinoma, mullerian mixed tumor, mixed cell adenocarcinoma, brenner tumour borderline malignancy, brenner tumor malignant (SEER ICD histology code 8380/3, 8381/3, 8382/3, 383/3,8310/3,8470/3,8471/3,8472/1,8480/3,8950/3,8323/3,9000/1,9000/3; small-cell lung cancer - Small cell carcinoma NOS, oat cell carcinoma, small cell carcinoma fusiform cell, small cell carcinoma intermediate cell, small cell-large cell carcinoma (SEER ICD histology code 8041/3, 8042/3,8043/3,8044/3, 8045/3); non-small cell lung cancer - Non-small cell carcinoma, squamous cell carcinoma nos, adenocarcinoma NOS, bronchiolo-alveolar adenocarcinoma, large cell carcinoma NOS, adenosquamous carcinoma, carcinoid tumour, NOS (except appendix m-8240/1), mesothelioma malignant (SEER ICD histology code 8046/3, 8070/3, 8140/3, 8250/3, 8012/3, 8560/3, 8240/3, 9050/3).

c. EDIH, empirical dietary index for hyperinsulinemia score assessing the ability of the dietary pattern to contribute to insulin hypersecretion - higher EDIH scores reflect more hyperinsulinemic dietary patterns; EDIP, empirical dietary inflammatory pattern score assessing the ability of the dietary pattern to contribute to chronic systemic inflammation - higher EDIP scores reflect more pro-inflammatory dietary patterns; HEI-2015, healthy eating index-2015 assessing adherence to the 2015-2020 Dietary Guidelines for Americans - higher HEI-2015 scores are indicative of greater adherence and higher dietary quality. EDIH and EDIP are positively correlated, whereas both scores are inversely correlated with HEI-2015, i.e., more hyperinsulinemic or pro-inflammatory dietary patterns are of lower dietary quality. Each dietary score was adjusted for total energy intake using the residual method.

d. We tested for interaction using the likelihood ratio test, comparing the full (with dietary score x BMI terms) and reduced models (without interaction terms).

e. Due to small sample size, we combined the overweight and obese categories into one.

f. Data are not available because of smaller sample sizes for ER- PR- HER2+ subtype of the breast, non endometrioid endometrial cancer, ovarian cancer and non small cell lung cancer.

**Supplementary Table S7. Multivariable-adjusted associations of dietary patterns with specific cancers in type 2 diabetes subgroups<sup>a,b,c</sup>**

|                                                       | 1-SD increment<br>in dietary score | P-value | 1-SD increment<br>in dietary score      | P-value | P interaction <sup>d</sup> |
|-------------------------------------------------------|------------------------------------|---------|-----------------------------------------|---------|----------------------------|
|                                                       | <i>Had type 2<br/>diabetes</i>     |         | <i>Did not have type<br/>2 diabetes</i> |         |                            |
| <b>Total cancer (except non-melanoma skin cancer)</b> |                                    |         |                                         |         |                            |
| EDIH                                                  | 1.02 (0.95, 1.09)                  | 0.6422  | <b>1.02 (1.01, 1.04)</b>                | 0.0072  | 1.0000                     |
| EDIP                                                  | 1.03 (0.94, 1.13)                  | 0.5700  | <b>1.03 (1.01, 1.06)</b>                | 0.002   | 0.7642                     |
| HEI2015                                               | 1.00 (0.93, 1.07)                  | 0.9673  | <b>0.97 (0.95, 0.98)</b>                | <.0001  | 0.3623                     |
| <b>Colorectal cancer</b>                              |                                    |         |                                         |         |                            |
| EDIH                                                  | 1.16 (0.93, 1.44)                  | 0.2007  | <b>1.06 (1.01, 1.13)</b>                | 0.029   | 0.8821                     |
| EDIP                                                  | 1.13 (0.81, 1.56)                  | 0.4729  | <b>1.09 (1.01, 1.17)</b>                | 0.0295  | 0.3383                     |
| HEI2015                                               | 0.97 (0.76, 1.24)                  | 0.8304  | <b>0.92 (0.87, 0.98)</b>                | 0.0043  | 0.6810                     |
| <b>Colon Cancer</b>                                   |                                    |         |                                         |         |                            |
| EDIH                                                  | 1.11 (0.86, 1.44)                  | 0.4191  | <b>1.08 (1.02, 1.15)</b>                | 0.0152  | 0.8769                     |
| EDIP                                                  | 1.10 (0.77, 1.58)                  | 0.5981  | <b>1.11 (1.02, 1.20)</b>                | 0.0155  | 0.5947                     |
| HEI2015                                               | 0.94 (0.72, 1.23)                  | 0.6662  | <b>0.92 (0.86, 0.97)</b>                | 0.0036  | 0.6976                     |
| <b>Proximal colon cancer</b>                          |                                    |         |                                         |         |                            |
| EDIH                                                  | 1.07 (0.76, 1.50)                  | 0.7135  | <b>1.12 (1.04, 1.21)</b>                | 0.0046  | 0.5174                     |
| EDIP                                                  | 0.92 (0.58, 1.44)                  | 0.7035  | <b>1.09 (0.98, 1.22)</b>                | 0.0949  | 0.2626                     |
| HEI2015                                               | 1.09 (0.76, 1.57)                  | 0.6365  | 0.92 (0.86, 1.00)                       | 0.0422  | 0.4382                     |
| <b>Distal colon and rectal cancer</b>                 |                                    |         |                                         |         |                            |
| EDIH                                                  | 1.11 (0.80, 1.54)                  | 0.5275  | 1.04 (0.94, 1.14)                       | 0.4614  | 0.8495                     |
| EDIP                                                  | 1.40 (0.88, 2.23)                  | 0.16    | 1.05 (0.98, 1.25)                       | 0.1178  | 0.9128                     |
| HEI2015                                               | 1.10 (0.78, 1.57)                  | 0.5854  | <b>0.91 (0.84, 1.00)</b>                | 0.0454  | 0.2800                     |
| <b>Intestinal polyps</b>                              |                                    |         |                                         |         |                            |
| EDIH                                                  | 0.99 (0.90, 1.09)                  | 0.851   | <b>1.08 (1.06, 1.10)</b>                | <.0001  | 0.0261                     |
| EDIP                                                  | 0.95 (0.84, 1.08)                  | 0.4368  | <b>1.07 (1.04, 1.10)</b>                | <.0001  | 0.0886                     |
| HEI2015                                               | 0.97 (0.88, 1.07)                  | 0.5502  | <b>0.93 (0.92, 0.95)</b>                | <.0001  | 0.2367                     |
| <b>Invasive breast cancer<sup>e</sup></b>             |                                    |         |                                         |         |                            |
| EDIH                                                  | 0.92 (0.79, 1.06)                  | 0.2487  | <b>1.05 (1.02, 1.09)</b>                | 0.0035  | 0.1352                     |
| EDIP                                                  | 1.10 (0.90, 1.34)                  | 0.3417  | <b>1.05 (1.00, 1.09)</b>                | 0.04    | 0.6330                     |
| HEI2015                                               | 1.05 (0.90, 1.22)                  | 0.5283  | 0.99 (0.96, 1.02)                       | 0.4777  | 0.4223                     |
| <b>ER+</b>                                            |                                    |         |                                         |         |                            |
| EDIH                                                  | 0.99 (0.85, 1.18)                  | 0.9854  | <b>1.04 (1.00, 1.08)</b>                | 0.0579  | 0.6421                     |
| EDIP                                                  | 1.05 (0.84, 1.33)                  | 0.6529  | 1.03 (0.98, 1.08)                       | 0.2181  | 0.8993                     |
| HEI2015                                               | 1.04 (0.87, 1.24)                  | 0.6593  | 1.00 (0.96, 1.04)                       | 0.9768  | 0.5071                     |
| <b>ER-</b>                                            |                                    |         |                                         |         |                            |
| EDIH                                                  | <b>0.68 (0.46, 0.98)</b>           | 0.0417  | <b>1.14 (1.04, 1.25)</b>                | 0.0054  | 0.0282                     |
| EDIP                                                  | 1.34 (0.85, 2.09)                  | 0.2064  | <b>1.10 (0.97, 1.25)</b>                | 0.1384  | 0.3608                     |
| HEI2015                                               | 1.00 (0.70, 1.42)                  | 0.9882  | 0.95 (0.87, 1.04)                       | 0.3041  | 0.8744                     |
| <b>PR+</b>                                            |                                    |         |                                         |         |                            |
| EDIH                                                  | 1.02 (0.85, 1.22)                  | 0.8287  | <b>1.05 (1.01, 1.09)</b>                | 0.025   | 0.8537                     |
| EDIP                                                  | 1.02 (0.80, 1.32)                  | 0.8581  | 1.04 (0.98, 1.09)                       | 0.1882  | 0.9383                     |
| HEI2015                                               | 1.03 (0.85, 1.24)                  | 0.7925  | 0.99 (0.95, 1.03)                       | 0.6974  | 0.6235                     |
| <b>PR-</b>                                            |                                    |         |                                         |         |                            |
| EDIH                                                  | <b>0.75 (0.56, 1.00)</b>           | 0.0474  | <b>1.07 (1.00, 1.14)</b>                | 0.0546  | <b>0.0287</b>              |



|                                  |                          |        |                          |        |               |
|----------------------------------|--------------------------|--------|--------------------------|--------|---------------|
| EDIP                             | 1.25 (0.88, 1.77)        | 0.2203 | 1.05 (0.95, 1.15)        | 0.3372 | 0.5033        |
| HEI2015                          | 1.11 (0.84, 1.47)        | 0.4783 | 0.98 (0.92, 1.05)        | 0.6485 | 0.4620        |
| <b>HER2+</b>                     |                          |        |                          |        |               |
| EDIH                             | 0.95 (0.60, 1.51)        | 0.8364 | <b>1.10 (0.99, 1.22)</b> | 0.0811 | 0.6315        |
| EDIP                             | 1.19 (0.61, 2.05)        | 0.7156 | 1.09 (0.95, 1.26)        | 0.2227 | 0.8003        |
| HEI2015                          | 0.70 (0.45, 1.10)        | 0.1259 | 0.99 (0.89, 1.10)        | 0.8166 | 0.1112        |
| <b>HER2-</b>                     |                          |        |                          |        |               |
| EDIH                             | 0.96 (0.81, 1.13)        | 0.6034 | <b>1.04 (1.00, 1.08)</b> | 0.0353 | 0.3929        |
| EDIP                             | 1.09 (0.86, 1.37)        | 0.4719 | <b>1.04 (0.98, 1.09)</b> | 0.1708 | 0.7133        |
| HEI2015                          | 1.06 (0.89, 1.27)        | 0.4937 | 0.99 (0.96, 1.03)        | 0.6956 | 0.2863        |
| <b>Luminal A</b>                 |                          |        |                          |        |               |
| EDIH                             | 0.99 (0.83, 1.18)        | 0.9069 | 1.03 (0.98, 1.07)        | 0.2139 | 0.7720        |
| EDIP                             | 1.09 (0.84, 1.40)        | 0.523  | 1.03 (0.97, 1.08)        | 0.3258 | 0.6360        |
| HEI2015                          | 1.08 (0.90, 1.32)        | 0.4044 | 0.99 (0.95, 1.03)        | 0.7043 | 0.1777        |
| <b>Luminal B</b>                 |                          |        |                          |        |               |
| EDIH                             | 1.10 (0.66, 1.86)        | 0.7138 | <b>1.14 (1.01, 1.29)</b> | 0.0358 | 0.5281        |
| EDIP                             | 1.07 (0.53, 2.17)        | 0.852  | 1.10 (0.94, 1.30)        | 0.2561 | 0.4092        |
| HEI2015                          | 0.64 (0.38, 1.08)        | 0.0971 | 1.02 (0.91, 1.16)        | 0.7118 | <b>0.0719</b> |
| <b>Triple negative</b>           |                          |        |                          |        |               |
| EDIH                             | 0.79 (0.51, 1.23)        | 0.2979 | <b>1.19 (1.06, 1.33)</b> | 0.0035 | <b>0.0790</b> |
| EDIP                             | 1.12 (0.65, 1.94)        | 0.6807 | 1.11 (0.94, 1.30)        | 0.2108 | 0.6976        |
| HEI2015                          | 0.94 (0.61, 1.46)        | 0.7858 | 0.98 (0.87, 1.10)        | 0.7087 | 0.7205        |
| <b>Invasive ductal carcinoma</b> |                          |        |                          |        |               |
| EDIH                             | 0.89 (0.74, 1.08)        | 0.248  | <b>1.06 (1.01, 1.11)</b> | 0.011  | <b>0.0771</b> |
| EDIP                             | 1.10 (0.85, 1.42)        | 0.4649 | <b>1.04 (0.98, 1.10)</b> | 0.1577 | 0.9287        |
| HEI2015                          | 1.09 (0.90, 1.33)        | 0.368  | 1.01 (0.96, 1.06)        | 0.6975 | 0.3097        |
| <b>Localized</b>                 |                          |        |                          |        |               |
| EDIH                             | 0.88 (0.73, 1.05)        | 0.143  | <b>1.07 (1.03, 1.11)</b> | 0.001  | <b>0.0299</b> |
| EDIP                             | 1.05 (0.83, 1.33)        | 0.6981 | <b>1.05 (1.00, 1.10)</b> | 0.0545 | 0.6938        |
| HEI2015                          | 1.13 (0.94, 1.36)        | 0.1846 | 0.99 (0.96, 1.03)        | 0.7772 | 0.1094        |
| <b>Regional/distant</b>          |                          |        |                          |        |               |
| EDIH                             | 1.02 (0.78, 1.34)        | 0.8752 | 1.01 (0.94, 1.08)        | 0.869  | 0.5639        |
| EDIP                             | 1.20 (0.82, 1.75)        | 0.3467 | 1.02 (0.94, 1.12)        | 0.6334 | 0.2963        |
| HEI2015                          | 0.87 (0.65, 1.17)        | 0.3546 | 0.99 (0.92, 1.06)        | 0.7244 | 0.3097        |
| <b>Endometrial cancer</b>        |                          |        |                          |        |               |
| EDIH                             | 1.00 (0.68, 1.45)        | 0.9833 | <b>1.12 (1.00, 1.24)</b> | 0.0432 | 0.5381        |
| EDIP                             | 1.17 (0.70, 1.96)        | 0.5457 | <b>1.13 (0.98, 1.31)</b> | 0.0958 | 0.8395        |
| HEI2015                          | 0.94 (0.64, 1.37)        | 0.7509 | 0.96 (0.86, 1.07)        | 0.45   | 0.8963        |
| <b>Lung cancer</b>               |                          |        |                          |        |               |
| EDIH                             | 1.01 (0.81, 1.27)        | 0.9109 | 0.95 (0.90, 0.99)        | 0.0255 | <b>0.0479</b> |
| EDIP                             | 1.18 (0.86, 1.63)        | 0.2978 | 0.96 (0.90, 1.02)        | 0.1876 | <b>0.0242</b> |
| HEI2015                          | <b>0.76 (0.60, 0.96)</b> | 0.0189 | 0.97 (0.93, 1.02)        | 0.2258 | <b>0.0175</b> |

a. HRs were derived from multivariable-adjusted Cox proportional hazards regression models adjusted for the following baseline covariates: age at enrollment, physical activity, race and ethnicity, educational level, family history of cancer, number of hormones used, comorbidity score, baseline cardiovascular disease status, baseline lung disease, number of supplements used, non-steroidal anti-inflammatory drug use, hormone therapy study arm (Not randomized to HRT, E-alone intervention, E-alone control, E+P intervention, E+P control), baseline hormone therapy ever, oral contraceptive duration, pack-years of smoking, coffee/tea, and total alcohol intake. Colorectal cancer and subtype analyses were additionally adjusted for colorectal cancer screening. Invasive breast cancer and subtype analyses were additionally adjusted for hysterectomy age, months of breast-feeding, age at menopause, mammogram ever, parity, bilateral oophorectomy, passive smoking, Gail 5-year risk score. Endometrial cancer and ovarian cancer analyses were additionally adjusted for age at first birth, age at menarche, age at menopause, months of breast-feeding, and parity. Ovarian cancer analyses were further adjusted for tubal ligation. Lung cancer analyses were additionally adjusted for smoking status (current, former, never smokers) and passive smoking. Dietary score was input in each model as a continuous variable.

b. We presented here the cancer sites that were found to be associated with dietary patterns in the main analysis. Cancer sites were defined as follows: total cancer was the first occurrence of any cancer except non-melanoma skin cancer. Proximal colon - cecum, ascending colon, hepatic flexure of colon, transverse colon (ICD site codes 18.0,18.2,18.3, 18.4); distal colon - splenic flexure of colon, descending colon, sigmoid colon (ICD site codes 18.5, 18.6,18.7); Luminal A breast cancer - ER+ and/or PR+, HER2-; luminal B breast cancer - ER+ and/or PR+ , HER2+.

c. EDIH, empirical dietary index for hyperinsulinemia score assessing the ability of the dietary pattern to contribute to insulin hypersecretion - higher EDIH scores reflect more hyperinsulinemic dietary patterns; EDIP, empirical dietary inflammatory pattern score assessing the ability of the dietary pattern to contribute to chronic systemic inflammation - higher EDIP scores reflect more pro-inflammatory dietary patterns; HEI-2015, healthy eating index-2015 assessing adherence to the 2015-2020 Dietary Guidelines for Americans - higher HEI-2015 scores are indicative of greater adherence and higher dietary quality. EDIH and EDIP are positively correlated, whereas both scores are inversely correlated with HEI-2015, i.e., more hyperinsulinemic or pro-inflammatory dietary patterns are of lower dietary quality. Each dietary score was adjusted for total energy intake using the residual method.

d. We tested for interaction using the likelihood ratio test, comparing the full (with dietary score x type II diabetes status terms) and reduced models (without interaction terms).

e. Data are not available because of smaller sample sizes for invasive luminal carcinoma and ER- PR- HER2+ subtypes of the breast, endometrial cancer subtypes, ovarian cancer and small cell lung cancer.

**Supplementary Table S8. Multivariable-adjusted associations of dietary patterns with specific cancers including mutual adjustment<sup>a</sup>**

|                               | Q1                    | Q2                                 | Q3                                 | Q4                                 | Q5                                 | 1-SD increment<br>in dietary score | P-value       |
|-------------------------------|-----------------------|------------------------------------|------------------------------------|------------------------------------|------------------------------------|------------------------------------|---------------|
| <b>Total cancer</b>           |                       |                                    |                                    |                                    |                                    |                                    |               |
| Cases/<br>noncases            | 3934/<br>18559        | 3861/<br>18633                     | 3772/<br>18722                     | 3594/<br>18900                     | 3607/<br>18886                     |                                    |               |
| EDIH                          | 1 (ref)               | 1.04 (0.99,<br>1.09)               | 1.05 (1.00,<br>1.10)               | 1.03 (0.98,<br>1.08)               | <b>1.07(1.01,<br/>1.13)</b>        | <b>1.01 (0.99,<br/>1.03)</b>       | 0.3489        |
| EDIP                          | 4131/18362<br>1 (ref) | 4027/18467<br>1.04 (0.99,<br>1.09) | 3703/18791<br>1.00 (0.95,<br>1.05) | 3608/18886<br>1.03 (0.97,<br>1.10) | 3299/19194<br>1.03 (0.96,<br>1.10) | 1.02 (0.99,<br>1.04)               | 0.1623        |
| HEI-2015                      | 3697/18796<br>1 (ref) | 3740/18753<br>0.98 (0.94,<br>1.03) | 3786/18708<br>0.98 (0.93,<br>1.02) | 3750/18743<br>0.95 (0.90,<br>1.00) | 3795/18698<br>0.95 (0.90,<br>1.00) | <b>0.97 (0.96,<br/>0.99)</b>       | <b>0.0017</b> |
| <b>Colorectal cancer</b>      |                       |                                    |                                    |                                    |                                    |                                    |               |
| Cases/<br>noncases            | 301/<br>21146         | 309/<br>21139                      | 372/<br>21075                      | 306/<br>21142                      | 320/<br>21127                      |                                    |               |
| EDIH                          | 1 (ref)               | 1.04 (0.87,<br>1.23)               | 1.26 (1.06,<br>1.49)               | 1.02 (0.85,<br>1.23)               | 1.10 (0.90,<br>1.34)               | 1.03 (0.97,<br>1.10)               | 0.3447        |
| EDIP                          | 315/21132<br>1 (ref)  | 333/21115<br>1.08 (0.91,<br>1.29)  | 338/21109<br>1.11 (0.92,<br>1.34)  | 319/21129<br>1.10 (0.89,<br>1.35)  | 303/21144<br>1.11 (0.88,<br>1.41)  | 1.03 (0.95,<br>1.13)               | 0.4446        |
| HEI-2015                      | 342/21105<br>1 (ref)  | 337/21110<br>0.97 (0.83,<br>1.13)  | 316/21131<br>0.91 (0.78,<br>1.07)  | 297/21150<br>0.84 (0.71,<br>0.99)  | 316/21131<br>0.88 (0.74,<br>1.05)  | 0.95 (0.90,<br>1.00)               | 0.0564        |
| <b>Colon cancer</b>           |                       |                                    |                                    |                                    |                                    |                                    |               |
| Cases/<br>noncases            | 250/<br>21217         | 264/<br>21203                      | 312/<br>21155                      | 254/<br>21213                      | 266/<br>21201                      |                                    |               |
| EDIH                          | 1 (ref)               | 1.06 (0.88,<br>1.28)               | 1.27 (1.06,<br>1.54)               | 1.02 (0.84,<br>1.25)               | 1.10 (0.88,<br>1.36)               | 1.04 (0.96,<br>1.11)               | 0.3285        |
| EDIP                          | 260/21207<br>1 (ref)  | 286/21181<br>1.13 (0.93,<br>1.36)  | 279/21188<br>1.11 (0.90,<br>1.37)  | 266/21201<br>1.12 (0.88,<br>1.40)  | 255/21212<br>1.16 (0.89,<br>1.50)  | 1.04 (0.95,<br>1.15)               | 0.3715        |
| HEI-2015                      | 285/21181<br>1 (ref)  | 284/21183<br>0.97 (0.82,<br>1.15)  | 264/21203<br>0.91 (0.76,<br>1.08)  | 249/21218<br>0.83 (0.69,<br>0.99)  | 264/21202<br>0.86 (0.71,<br>1.04)  | 0.94 (0.88,<br>1.00)               | 0.0534        |
| <b>Invasive breast cancer</b> |                       |                                    |                                    |                                    |                                    |                                    |               |
| Cases/<br>noncases            | 899/<br>17565         | 921/<br>17544                      | 827/<br>17637                      | 843/<br>17622                      | 903/<br>17561                      |                                    |               |
| EDIH                          | 1 (ref)               | 1.08 (0.98,<br>1.19)               | 1.01 (0.91,<br>1.12)               | 1.06 (0.95,<br>1.18)               | <b>1.18 (1.05,<br/>1.33)</b>       | <b>1.03 (1.00,<br/>1.08)</b>       | 0.0857        |
| EDIP                          | 926/17538<br>1 (ref)  | 936/17529<br>1.08 (0.97,<br>1.19)  | 874/17590<br>1.05 (0.94,<br>1.17)  | 866/17599<br>1.09 (0.97,<br>1.24)  | 791/17673<br>1.05 (0.91,<br>1.20)  | 1.03 (0.98,<br>1.08)               | 0.2557        |
| HEI-2015                      | 872/17592<br>1 (ref)  | 867/17597<br>0.96 (0.87,<br>1.06)  | 847/17617<br>0.93 (0.84,<br>1.02)  | 869/17595<br>0.95 (0.86,<br>1.06)  | 938/17526<br>1.04 (0.94,<br>1.15)  | 1.01 (0.97,<br>1.04)               | 0.6743        |
| <b>Endometrial cancer</b>     |                       |                                    |                                    |                                    |                                    |                                    |               |
| Cases/<br>noncases            | 74/<br>8946           | 88/<br>8932                        | 79/<br>8942                        | 73/<br>8947                        | 89/<br>8931                        |                                    |               |
| EDIH                          | 1 (ref)               | 1.30 (0.94,<br>1.80)               | 1.22 (0.86,<br>1.73)               | 1.20 (0.83,<br>1.74)               | <b>1.54 (1.05,<br/>2.26)</b>       | 1.09 (0.97,<br>1.23)               | 0.1680        |
| EDIP                          | 81/8939<br>1 (ref)    | 93/8927<br>1.12 (0.80,<br>1.57)    | 67/8954<br>0.84 (0.57,<br>1.24)    | 84/8936<br>1.10 (0.73,<br>1.66)    | 78/8942<br>1.14 (0.72,<br>1.80)    | 1.09 (0.93,<br>1.28)               | 0.2872        |
| HEI-2015                      | 67/8953<br>1 (ref)    | 84/8936<br>1.21 (0.87,<br>1.68)    | 98/8923<br>1.36 (0.99,<br>1.88)    | 81/8939<br>1.11 (0.79,<br>1.57)    | 73/8947<br>1.00 (0.69,<br>1.44)    | 1.00 (0.89,<br>1.11)               | 0.9364        |
| <b>Lung cancer</b>            |                       |                                    |                                    |                                    |                                    |                                    |               |
| Cases/<br>noncases            | 482/<br>20722         | 408/<br>20797                      | 410/<br>20795                      | 417/<br>20788                      | 399/<br>20805                      |                                    |               |
| EDIH                          | 1 (ref)               | 0.93 (0.81,<br>1.07)               | 0.95 (0.82,<br>1.10)               | 0.98 (0.84,<br>1.14)               | 0.85 (0.72,<br>1.00)               | 0.94 (0.90,<br>1.00)               | 0.0422        |
| EDIP                          | 547/20657<br>1 (ref)  | 464/20741<br>1.06 (0.92,<br>1.22)  | 397/20808<br>0.99 (0.84,<br>1.16)  | 377/20828<br>1.05 (0.88,<br>1.25)  | 331/20873<br>1.05 (0.86,<br>1.28)  | 0.99 (0.92,<br>1.06)               | 0.6728        |
|                               | 520/20684             | 439/20765                          | 415/20789                          | 387/20817                          | 354/20850                          |                                    |               |

|          |         |                      |                      |                      |                      |                      |        |
|----------|---------|----------------------|----------------------|----------------------|----------------------|----------------------|--------|
| HEI-2015 | 1 (ref) | 0.97 (0.85,<br>1.10) | 0.98 (0.85,<br>1.12) | 0.95 (0.82,<br>1.09) | 0.88 (0.76,<br>1.03) | 0.94 (0.89,<br>0.98) | 0.0090 |
|----------|---------|----------------------|----------------------|----------------------|----------------------|----------------------|--------|

a. All three dietary indices were included in the same multivariable adjusted model. Values presented are hazard ratios (HR) and 95% confidence intervals (95% CI) for relative risk and incidence rate per 100,000 person-years for absolute risk. HRs were derived from multivariable-adjusted Cox proportional hazards regression models adjusted for the following baseline covariates: age at enrollment, physical activity, race and ethnicity, educational level, family history of cancer, number of hormones used, comorbidity score, baseline cardiovascular disease status, baseline lung disease, number of supplements used, non-steroidal anti-inflammatory drug use, hormone therapy study arm, baseline hormone therapy ever, oral contraceptive duration, pack-years of smoking, coffee/tea, and total alcohol intake. Colorectal cancer and subtype analyses were additionally adjusted for colorectal cancer screening. Invasive breast cancer and subtype analyses were additionally adjusted for months of breast-feeding, age at menopause, mammogram ever, parity, bilateral oophorectomy, passive smoking, Gail 5-year risk score. Endometrial cancer and ovarian cancer analyses were additionally adjusted for age at first birth, age at menarche, age at menopause, months of breast-feeding, and parity. Ovarian cancer analyses were further adjusted for tubal ligation. Lung cancer analyses were additionally adjusted for smoking status and passive smoking.
